# Supplementary material for: Enzyme‐Primed Native Chemical Ligation Produces Autoinducing Cyclopeptides in Clostridia
Source: PubMed Central journal article supplement — Angew Chem Int Ed Engl. 2021 Mar 26;60(19):10670–9. doi: 10.1002/anie.202016378 (PMC8251862; doi:10.1002/anie.202016378), 2021-03-26
Supplement: ANIE-60-10670-s001.pdf [file ANIE-60-10670-s001.pdf]

## Supporting Information

### **Enzyme-Primed Native Chemical Ligation Produces Autoinducing Cyclopeptides in Clostridia**

*Evelyn M. Molloy, Maria Dell, Veit G. Hänsch, Kyle L. Dunbar, Romy Feldmann, Ansgar Oberheide, Lydia Seyfarth, Jana Kumpfmüller, Therese Horch, Hans-Dieter Arndt, and Christian Hertweck\**

anie\_202016378\_sm\_miscellaneous\_information.pdf

## Table of Contents

|                                                                                                                                       |      |
|---------------------------------------------------------------------------------------------------------------------------------------|------|
| <b>Experimental Procedures</b>                                                                                                        | 3–11 |
| Figure S1. AIP biosynthetic loci identified in the <i>R. cellulolyticum</i> genome                                                    | 12   |
| Figure S2. Prediction of the core peptide sequences for <i>R. cellulolyticum</i> AgrD1–4                                              | 13   |
| Figure S3. HPLC-HRMS detection of <i>Rc</i> -AIP1, an AIP produced by <i>R. cellulolyticum</i> .                                      | 14   |
| Figure S4. HRMS <sup>2</sup> -based fragmentation of candidate AIPs and the synthetic reference cyclopeptide <b>2</b>                 | 15   |
| Figure S5. Overview of synthetic strategies                                                                                           | 16   |
| Figure S6. <sup>13</sup> C-NMR spectrum of synthetic reference thiolactone <b>1</b>                                                   | 17   |
| Figure S7. Comparison by HPLC-HRMS of retention time and accurate mass of <i>Rc</i> -AIP1 with references                             | 18   |
| Figure S8. HRMS <sup>2</sup> spectra of the synthetic thiolactone <b>1</b>                                                            | 19   |
| Figure S9. Thiolactone <b>1</b> spontaneously converts into lactam <b>2</b>                                                           | 20   |
| Figure S10. <sup>13</sup> C-NMR spectrum of synthetic reference cyclopeptide <b>2</b>                                                 | 21   |
| Figure S11. Rearrangement kinetics of thiolactone <b>1</b> measured with Ellman's reagent                                             | 22   |
| Figure S12. Generation of <i>R. cellulolyticum</i> $\Delta$ <i>agrD1</i> by CRISPR-nCas9 genome editing                               | 23   |
| Figure S13. Bioinformatic screen for AIP biosynthetic gene clusters in diverse Clostridia                                             | 24   |
| Figure S14. Three <i>Ruminiclostridium</i> species produce AIPs with identical fragmentation pattern                                  | 25   |
| Figure S15. HRMS <sup>2</sup> -based fragmentation of <i>Ca</i> -AIP1 from <i>C. acetobutylicum</i>                                   | 26   |
| Figure S16. HRMS <sup>2</sup> -based fragmentation of <i>Cc</i> -AIP1 from <i>C. cellulovorans</i>                                    | 27   |
| Figure S17. HRMS <sup>2</sup> -based fragmentation of <i>Rp</i> -AIP2 from <i>R. papyrosolvans</i>                                    | 28   |
| Figure S18. HRMS <sup>2</sup> -based fragmentation of <i>Rj</i> -AIP2 from <i>R. josui</i>                                            | 29   |
| Figure S19. Overview of method to distinguish thiolactone or cyclopeptide form of AIPs                                                | 30   |
| Figure S20. Thiolactone susceptibility to NaOH hydrolysis                                                                             | 31   |
| Figure S21. Lactam resistance to NaOH hydrolysis                                                                                      | 32   |
| Figure S22. Chemoselective labeling of free thiols by <i>N</i> -benzylmaleimide                                                       | 33   |
| Figure S23. Retention time of controls for method to distinguish thiolactone or cyclopeptide form of AIPs                             | 34   |
| Figure S24. Demonstration of expected cAIP behavior of <i>Rc</i> -AIP1 in crude extract                                               | 35   |
| Figure S25. Fragmentation pattern of maleimide adducts of <i>Rc</i> -AIP1, <i>Rp</i> -AIP1, <i>Rj</i> -AIP1 and cyclopeptide <b>2</b> | 36   |
| Figure S26. Fragmentation pattern of the maleimide adduct of <i>Ca</i> -AIP1 from <i>C. acetobutylicum</i>                            | 37   |
| Figure S27. Fragmentation pattern of the maleimide adduct of <i>Rp</i> -AIP2 from <i>R. papyrosolvans</i>                             | 38   |
| Figure S28. Fragmentation pattern of the maleimide adduct of <i>Rj</i> -AIP2 from <i>R. josui</i>                                     | 39   |
| Figure S29. Investigation of the stability of analogue <b>4</b>                                                                       | 40   |
| Figure S30. Controls for determination of rearrangement kinetics using Ellman's reagent                                               | 41   |
| Figure S31. <sup>1</sup> H-NMR spectra of peptide <b>1a</b>                                                                           | 42   |
| Figure S32. <sup>13</sup> C-NMR spectrum of peptide <b>1a</b>                                                                         | 43   |
| Figure S33. <sup>1</sup> H-NMR spectrum of linear peptide <b>3</b>                                                                    | 44   |
| Figure S34. <sup>13</sup> C-NMR spectrum of linear peptide <b>3</b>                                                                   | 45   |
| Figure S35. <sup>1</sup> H-NMR spectrum of peptide <b>5a</b>                                                                          | 46   |
| Figure S36. <sup>13</sup> C-NMR spectrum of peptide <b>5a</b>                                                                         | 47   |
| Figure S37. <sup>1</sup> H-NMR spectrum of peptide <b>1b</b>                                                                          | 48   |
| Figure S38. <sup>13</sup> C-NMR spectrum of peptide <b>1b</b>                                                                         | 49   |
| Figure S39. <sup>1</sup> H-NMR spectrum of thiolactone reference <b>1</b>                                                             | 50   |
| Figure S40. <sup>13</sup> C-DEPT-NMR spectrum of thiolactone reference <b>1</b>                                                       | 51   |
| Figure S41. <sup>1</sup> H, <sup>1</sup> H-COSY NMR spectrum of thiolactone reference <b>1</b>                                        | 52   |
| Figure S42. <sup>1</sup> H, <sup>13</sup> C-HSQC NMR spectrum of thiolactone reference <b>1</b>                                       | 53   |
| Figure S43. <sup>1</sup> H, <sup>13</sup> C-HMBC NMR spectrum of thiolactone reference <b>1</b>                                       | 54   |
| Figure S44. <sup>1</sup> H-NMR spectrum of cyclopeptide reference <b>2</b>                                                            | 55   |
| Figure S45. <sup>13</sup> C-DEPT-NMR spectrum of cyclopeptide reference <b>2</b>                                                      | 56   |

|                                                                                                  |       |
|--------------------------------------------------------------------------------------------------|-------|
| Figure S46. <sup>1</sup> H, <sup>1</sup> H-COSY NMR spectrum of cyclopeptide reference <b>2</b>  | 57    |
| Figure S47. <sup>1</sup> H, <sup>13</sup> C-HSQC NMR spectrum of cyclopeptide reference <b>2</b> | 58    |
| Figure S48. <sup>1</sup> H, <sup>13</sup> C-HMBC NMR spectrum of cyclopeptide reference <b>2</b> | 59    |
| Figure S49. <sup>1</sup> H-NMR spectrum of <i>N</i> -acetylated analogue <b>4</b>                | 60    |
| Figure S50. <sup>13</sup> C-NMR spectrum of <i>N</i> -acetylated analogue <b>4</b>               | 61    |
| Figure S51. <sup>1</sup> H-NMR spectrum of thiazole-containing analogue <b>5</b>                 | 62    |
| Figure S52. <sup>13</sup> C-NMR spectrum of thiazole-containing analogue <b>5</b>                | 63    |
| Figure S53. Structure elucidation of thiolactone <b>1</b> and cyclopeptide <b>2</b>              | 64    |
| <br>                                                                                             |       |
| Table S1. Putative AIP biosynthetic gene clusters identified in diverse Clostridia               | 65–66 |
| Table S2. Strains used in this study                                                             | 67    |
| Table S3. Plasmids used in this study                                                            | 68    |
| Table S4. Oligonucleotide primers used in this study                                             | 69    |
| Table S5. Sequences of the synthesized cassette for gene knockout via CRISPR-nCas9CRISPR/Cas.    | 70    |
| Table S6. Sequences of structurally verified AIPs used for the WebLogo diagram                   | 71    |
| Table S7. Amounts of reagents used in every step of the SPPS of coupling in method A             | 72    |
| Table S8. Amounts of reagents used in every step of the SPPS of coupling in method B             | 73    |
| <br>                                                                                             |       |
| <b>References</b>                                                                                | 74    |

## Experimental Procedures

Media components were purchased from Sigma, Roth and Difco. All chemicals were purchased from commercial suppliers (Sigma, Roth, etc.) without further purification. Oligonucleotide primer synthesis was performed by Eurofins Genomics. Restriction endonucleases were purchased from New England Biolabs. Standard PCRs and colony PCRs were performed using Phusion HF DNA polymerase and OneTaq Quick-Load 2 x Master Mix (New England Biolabs), respectively. All plasmids were constructed using either NEBuilder HiFi DNA Assembly Master Mix or T4 DNA ligase. For final verification, plasmids and PCR products were sequenced with GENEWIZ, Germany. All strains, plasmids and oligonucleotide primers used in this study are listed in Table S2, Table S3, and Table S4, respectively.

**Bacterial strains and culturing conditions** – *Escherichia coli* strains were grown in lysogeny broth (LB) shaken at 160 rpm or on LB agar plates at 37 °C with appropriate antibiotic selection (gentamicin, 200 µg · mL<sup>-1</sup> and ampicillin 100 µg · mL<sup>-1</sup>). All plasmid construction and storage was performed with *E. coli* TOP10.

Clostridia strains were cultivated under an anaerobic atmosphere (N<sub>2</sub>:H<sub>2</sub>:CO<sub>2</sub>, 85:5:10 v/v/v) in a Whitley A35 anaerobic work station (Don Whitley Scientific) operating at 37 °C. To allow for gas exchange, cultures were grown in unsealed test tubes or glass bottles with a loosened lid. Routine cultivation of *Ruminiclostridium cellulolyticum* DSM 5812 strains (wild type and  $\Delta$ agrD1) was performed in CM3 medium (modified).<sup>[1]</sup> For AIP production, *R. cellulolyticum* strains were cultivated in a modified version of VM medium<sup>[2]</sup> at pH 7.1. Medium components for 1 L VM (modified): 1 g KH<sub>2</sub>PO<sub>4</sub>, 3.4 g K<sub>2</sub>HPO<sub>4</sub>, 2.1 g urea, 10 g 3-(*N*-morpholino)propanesulfonic acid, 2 g yeast extract, 1 g MgCl<sub>2</sub>·6H<sub>2</sub>O, 0.15 g CaCl<sub>2</sub>·2H<sub>2</sub>O, 1.25 mg FeSO<sub>4</sub>·7H<sub>2</sub>O, 1 g cysteine-HCl, 5.1 g cellobiose, 10 mL vitamin solution (250 mg · L<sup>-1</sup> *p*-aminobenzoic acid, 250 mg · L<sup>-1</sup> thiamine, 100 mg · L<sup>-1</sup> D-biotin, 150 mg · L<sup>-1</sup> nicotinic acid, 250 mg · L<sup>-1</sup> riboflavin, 100 mg · L<sup>-1</sup> cyanocobalamine, 270 mg · L<sup>-1</sup> calcium pantothenate), 1 mL trace element solution (5 % (v/v) 10 M HCl, 5 g · L<sup>-1</sup> FeSO<sub>4</sub>·7H<sub>2</sub>O, 1.44 g · L<sup>-1</sup> ZnSO<sub>4</sub>·7H<sub>2</sub>O, 1.12 g · L<sup>-1</sup> MnSO<sub>4</sub>·7H<sub>2</sub>O, 30 mg · L<sup>-1</sup> H<sub>3</sub>BO<sub>3</sub>, 20 mg · L<sup>-1</sup> CoCl<sub>2</sub>·6H<sub>2</sub>O, 40 mg · L<sup>-1</sup> NiCl<sub>2</sub>·6H<sub>2</sub>O, 20 mg · L<sup>-1</sup> Na<sub>2</sub>SeO<sub>4</sub>, 200 mg · L<sup>-1</sup> Na<sub>2</sub>B<sub>4</sub>O<sub>7</sub>·10H<sub>2</sub>O, 1 g · L<sup>-1</sup> (NH<sub>4</sub>)<sub>6</sub>Mo<sub>7</sub>O<sub>24</sub>·4H<sub>2</sub>O). Where appropriate, *R. cellulolyticum* cultures were supplemented with erythromycin (10 µg · mL<sup>-1</sup> for agar and 10 µg · mL<sup>-1</sup> for broth). *Ruminiclostridium josui* DSM 25723 and *Clostridium acetobutylicum* DSM 792 were grown in M122 (Leibniz Institute DSMZ-German Collection of Microorganisms and Cell Cultures GmbH) and P2 medium,<sup>[3]</sup> respectively. *Clostridium cellulovorans* DSM 3052 and *Ruminiclostridium papyrosolvans* DSM 2782 were grown in CM3 medium (modified).

**Generation of bacterial metabolite profiles** – Clostridia cultures were grown until stationary phase, at which time each culture was extracted with 1 volume of ethyl acetate. The extract was dried over Na<sub>2</sub>SO<sub>4</sub> and the ethyl acetate was removed using a rotary-evaporator. The resultant solid was dissolved in methanol to give a 500 × concentrate of the extract, then analyzed by HPLC-HRMS.

**Plasmid construction** – In order to generate an in-frame nonsense mutation in the genome of *R. cellulolyticum*, a knockout plasmid was generated as previously described with minor changes.<sup>[4]</sup> Briefly, the webtool CRISPy-web<sup>[5]</sup> was used to find a suitable target site containing the necessary PAM (NGG) sequence for knockout of the gene encoding the AIP precursor (Ccel\_2126) via the CRISPR-nCas9 system.<sup>[6]</sup> A cassette containing the P4 promoter regulated sgRNA as well as the homologous arms (approx. 300 bp) surrounding the mutated N20 sequence was obtained by gene synthesis (Genewiz, Germany) and can be found in Table S5. This cassette was cut from the supplied vector with *Bsa*I and ligated with *Bsa*I-digested pCasC to give pCasC-Ccel2126-KO.

For genetic complementation, a plasmid expressing Ccel\_2126 under the control of a constitutive promoter (*P*thl) and the corresponding empty vector control were constructed as follows. The shuttle plasmid pSOS95-oriT (unpublished data), that originates from pSOS95 and additionally contains the origin of transfer (*oriT*/*traJ* region) for conjugational plasmid transfer, was *Bam*HI/*Nar*I-digested. The gene Ccel\_2126 was amplified from genomic DNA of *R. cellulolyticum* using primers JK744/JK745. The *thl* promoter together with a cloning site was generated by annealing of primers JK742/JK743. Both inserts were individually assembled with the plasmid backbone and resulted in pCPthl-*agrD1* and pCPthl-empty, respectively.

After isolation, all plasmids were verified by sequencing and prepared for electroporation into *R. cellulolyticum* or *R. cellulolyticum*  $\Delta$ agrD1 by methylation using the *Msp*I methyl transferase.<sup>[7]</sup>

**Generation of *R. cellulolyticum*  $\Delta$ agrD1 and its genetic complementation** – *R. cellulolyticum*  $\Delta$ agrD1, which contains an in-frame nonsense mutation in Ccel\_2126, was generated using pCasC-Ccel2126-KO as previously described.<sup>[4]</sup> The design of pCasC-Ccel2126-KO was such that successful editing of the target gene would introduce the desired mutation (an in-frame stop codon, TAA), as well as an *Spe*I restriction endonuclease site (ACTAGT) to facilitate screening of transformants. After electroporation, individual potential *R. cellulolyticum*  $\Delta$ agrD1 colonies were randomly picked and subjected to colony PCR using OneTaq DNA Polymerase with primers JK683 and JK684. The presence or absence of the restriction site (corresponding to edited or unedited Ccel2126) was established by digestion of the generated PCR products (1,026 bp) with restriction endonuclease *Spe*I, followed by agarose gel electrophoresis (1.5 % agarose gel) of the fragments. Pure mutant colonies were identified by the presence of the expected fragments of (580 bp and 446 bp) and lack of full-length PCR product (1,026 bp), while the PCR product remained undigested in the case of the wild-type control. In order to ensure the chosen mutant was free of wild-type contamination, a PCR using primers JK683 and JK685 was done. Primer JK685 binds in the unmutated N20 sequence of Ccel\_2126 and thus only gives a product (460 bp) if wild-type cells remain. The purification of the undigested  $\Delta$ Ccel\_2126 PCR product was performed using a Monarch PCR and DNA Cleanup Kit (New England Biolabs) and DNA sequencing with primer JK683 was used to confirm the presence of the desired mutation (Figure S12). The strain was subcultured in the absence of antibiotic selection until erythromycin resistance was lost, then lack of the KO plasmid was confirmed by PCR. For genetic complementation, the cured mutant strain *R. cellulolyticum*  $\Delta$ agrD1 was transformed with pCPthl-*agrD1* and pCPthl-empty following the same electroporation procedure as described elsewhere.<sup>[4]</sup> Transformants were selected on erythromycin-containing plates and verified by colony PCR.

**Endospore formation assay** – *R. cellulolyticum* strains (wild type and  $\Delta$ agrD1) were grown in 5 mL of CM3 broth to early exponential phase ( $OD_{600nm}$  of 0.25–0.35). From these, 2.5 % inocula were made in three 1.5 mL volumes of VM broth supplemented with 0.5 %  $CaCO_3$  (VM-Ca) to give three technical replicates for each assay condition. For *R. cellulolyticum*  $\Delta$ agrD1, synthetic peptides were freshly dissolved in dimethyl sulfoxide (DMSO) and individually added to the VM-Ca cultures to give the desired final test concentration of **2**, **3**, **4** or **5** (0.5 % DMSO final concentration). Each time the assay was performed, untreated *R. cellulolyticum* wild type and *R. cellulolyticum*  $\Delta$ agrD1 cultures (containing 0.5 % DMSO final concentration) were included as positive and negative controls, respectively.

After 3 days incubation to enable sporulation, a 200  $\mu$ L sample of each culture was heated to 80 °C for 15 min to kill vegetative cells. Serial dilutions ( $10^9$ – $10^{-2}$ ) of the heat-treated cell suspensions were performed in phosphate-buffered saline (PBS: 137 mM NaCl, 2.7 mM KCl, 10 mM  $Na_2HPO_4$ , 1.8 mM  $KH_2PO_4$ ; pH 7) and 20  $\mu$ L aliquots were spotted onto VM agar.<sup>[8]</sup> Heat-resistant colony-forming units (CFU) that appeared after 5 days of incubation were counted. For each assay condition, the mean of the three technical replicates was calculated and the value noted as a biological replicate; the entire procedure was repeated on at least three separate occasions to give a minimum of three biological replicates. Statistical analysis was conducted using the unpaired t-test with Welch's correction in Graph Pad Prism 8.4.3.

Directly after addition to the cultures, the remainder of the stock solutions in DMSO were lyophilized and subjected to HPLC-HRMS to ensure the purity and condition of the compounds at the point of addition. In the case of **4**, an additional experiment was performed to check its stability under conditions mimicking those of the culture medium (at 37 °C in 50 mM 3-(*N*-morpholino)propanesulfonic acid (MOPS), pH 7.2) (Figure S29).

**Bioinformatic analyses** – Given the high level of sequence divergence in both the AgrB and AgrD protein families, putative AIP biosynthetic gene clusters in the Clostridia genomes were identified using PSI-BLAST with a concatenated query sequence comprised of previously reported AgrB/AgrD proteins. For this analysis, sequences from the following bacteria were used: *Staphylococcus aureus*, *Clostridioides difficile*, *C. acetobutylicum*, *Clostridium perfringens*, and *Clostridium botulinum*.

The enzyme responsible for leader peptide removal has not been identified in the Clostridia, but based on staphylococcal AIP biosynthesis, it is likely a general protease. We used 16S phylogeny for strain selection with the assumption that closely related strains would be more likely to have leader peptidases with identical patterns of specificity, while more distantly strains would be less likely. In this way, we aimed to test whether cAIP biosynthesis from an NTE-free precursor is a general feature of the Clostridia. For the 16s rRNA phylogenetic tree, sequences were aligned with MAFFT 7<sup>[9]</sup> and the alignment was manually adjusted. The phylogenetic tree was reconstructed using the neighbor-joining method with the maximum composite likelihood model and 1,000 bootstrap replicates in MEGA6.<sup>[10]</sup> The AgrB and AgrD multiple sequence alignments were performed with Clustal Omega using the default parameters.<sup>[11]</sup> The sequence logo diagram was made using the WebLogo<sup>[12]</sup> webtool and the AgrD sequence alignments using the default parameters.

**Thin Layer Chromatography (TLC)** – Merck precoated silica gel plates (60F-254) were used. Compounds were visualized using ultraviolet light irradiation at 254 nm and 366 nm or by using the following staining agents (dip, dry and heat development).

Staining solution A:  $KMnO_4$  (1.00 g),  $K_2CO_3$  (6.60 g), 5 % NaOH (1.70 mL) in  $H_2O$  (90 mL).

Staining solution B: Ninhydrin (1.00 g) in EtOH/HOAc (97:3, 100 mL).

**Silica Gel Flash Chromatography** – Purifications were performed using silica gel from Macherey & Nagel (particle size 40–60  $\mu$ m) under approximately 0.3 bar pressure.

**NMR** – All NMR spectra (1D ( $^1H$ ,  $^{13}C$  and DEPT-135) and 2D (COSY, HSQC, HMBC)) were recorded on a Bruker Avance I 250, Fourier 300, Avance III 400, Avance III HD 500 or Avance III 600 system (600 MHz with Bruker cryo platform). The solvents used are deuterated (Deutero GmbH). Chemical shifts are given in ppm relative to the external standard  $Me_4Si$ . Residual peaks of the respective solvent were used as an internal standard (DMSO- $d_6$ :  $\delta_H$  = 2.50 ppm,  $\delta_C$  = 39.52 ppm; MeOD- $d_4$ :  $\delta_H$  = 3.31 ppm,  $\delta_C$  = 49.00 ppm, MeCN- $d_3$ :  $\delta_H$  = 1.94 ppm,  $\delta_C$  = 118.26 ppm). The abbreviations used to describe the NMR spectra are as follows: s = singlet, d = doublet, t = triplet, q = quartet, qt = quintet, br = broad.

**HPLC-HRMS and HPLC-HRMS/MS method A** – This HPLC/HRMS analysis was performed on a Thermo Accela HPLC-system coupled to a QExactive Hybrid-Quadrupole-Orbitrap (Thermo Fischer Scientific) mass spectrometer equipped with an electrospray ion source. Separation was performed with an Accucore C18 column (2.1  $\times$  100 mm, 2.6  $\mu$ m, Thermo Fisher) operating at a flow rate of 200  $\mu$ L  $\cdot$  min $^{-1}$ , with water + 0.1 % formic acid (solvent A) and acetonitrile + 0.1 % formic acid (solvent B) and the following gradient: starting 5 % solvent B to 98 % solvent B in 10 min, hold 98 % solvent B for 4 min.

**HPLC-HRMS method B** – This HPLC/HRMS analysis was performed on a Thermo Accela HPLC-system coupled to a QExactive Hybrid-Quadrupole-Orbitrap (Thermo Fischer Scientific) mass spectrometer equipped with an electrospray ion source. Separation was performed with an Betasil C18 column (2.1  $\times$  150 mm, 3  $\mu$ m, Thermo Fisher) operating at a flow rate of 200  $\mu$ L  $\cdot$  min $^{-1}$ , with water + 0.1 % formic acid (solvent A) and acetonitrile + 0.1 % formic acid (solvent B) and the following gradient: starting 5 % solvent B for 1 min, then 5 % solvent B to 98 % solvent B in 15 min, then hold 98 % solvent B for 15 min.

**HPLC-HRMS and HPLC-HRMS/MS method C** – This HPLC/HRMS analysis was performed on a Thermo Ultimate3000 UHPLC-system coupled to a QExactive Hybrid-Quadrupole-Orbitrap (Thermo Fischer Scientific) mass spectrometer equipped with an electrospray ion source. The separation was performed on a Accucore C18 column (2.1  $\times$  100 mm, 2.6  $\mu$ m, Thermo Fisher) operating at a flow rate of 200  $\mu$ L  $\cdot$  min $^{-1}$ , with water + 0.1 % formic acid (solvent A) and acetonitrile + 0.1 % formic acid (solvent B) and the following gradient: starting 5 % solvent B to 98 % solvent B in 10 min, hold 98 % solvent B for 4 min.

**HPLC-HRMS and HPLC-HRMS/MS method D** – This HPLC/HRMS analysis was performed on a Thermo Ultimate3000 UHPLC-system coupled to a QExactive Hybrid-Quadrupole-Orbitrap (Thermo Fischer Scientific) mass spectrometer equipped with an electrospray ion source. The separation was performed on a Accucore C18 column (2.1 × 100 mm, 2.6 μm, Thermo Fisher) operating at a flow rate of 200 μL · min<sup>-1</sup>, with water + 0.1 % formic acid (solvent A) and acetonitrile + 0.1 % formic acid (solvent B) and the following gradient: starting 5 % solvent B to 98 % solvent B in 7 min, hold 98 % solvent B for 3 min.

**HPLC-HRMS method E** – High-resolution mass spectrometry (HR-MS) measurements for sum formula confirmation were performed on a LC-coupled MAXIS Impact ESI-TOF spectrometer (Bruker Daltronics, Bremen, Germany). Calculated masses were obtained using the software *ChemDraw Ultra* (CambridgeSoft Corporation) or *Xcalibur*. (Thermo Fisher Scientific)

**HPLC- MS method A** – Analyses were performed on a Shimadzu system with electrospray ion source consisting of a system controller (SLC-10AVP), a column oven (CTO-10ACVP), an auto-injector (SIL-10ADVP), a degasser (DGU-14A), two pumps (LC-10ATVP), a UV-vis-detector (SPD-10AVP), and a splitter (ICP 04-20). Eluents used: CH<sub>3</sub>CN (A), water (B) containing 0.1 vol % HCOOH. Mass spectra were recorded by an ESI ion trap mass spectrometer (Finnigan Mat LCQ). The column used was a NUCLEODUR C18 Gravity 5 μm and the following gradient was applied: 10 min 10–95 % acetonitrile, 5 min 95 % acetonitrile, 3 min 10 % acetonitrile. Flow rate: 1 mL · min<sup>-1</sup>.

**HPLC- MS method B** – Analyses were performed on a Shimadzu system with electrospray ion source consisting of a system controller (SLC-10AVP), a column oven (CTO-10ACVP), an auto-injector (SIL-10ADVP), a degasser (DGU-14A), two pumps (LC-10ATVP), a UV-vis-detector (SPD-10AVP), and a splitter (ICP 04-20). Eluents used: CH<sub>3</sub>CN (A), water (B) containing 0.1 vol % HCOOH. Mass spectra were recorded by an ESI ion trap mass spectrometer (Finnigan Mat LCQ). The column used was a NUCLEODUR C18 Gravity 5 μm and the following gradient was applied: 10 min 30–95 % acetonitrile, 5 min 95 % acetonitrile, 3 min 30 % acetonitrile. Flow rate: 1 mL · min<sup>-1</sup>.

**HPLC-MS method C** – LTQ Velos Ion Trap Benchtop LC-MS with electrospray ion source and Surveyor HPLC system (Thermo Fisher Scientific, Bremen). HPLC conditions using LTQ: C18 column (Phenomenex Kinetex XB-C18, 2.6 μm, 100 × 3 mm) and gradient elution (MeCN (0.1 % (v/v) HCOOH) / H<sub>2</sub>O (0.1 % (v/v) HCOOH)) 10/90 for 1 min, going up to 100/0 in 8 min, then 100/0 for 4 min; flow rate 0.6 mL · min<sup>-1</sup>; injection volume: 5 μL.

**Preparative HPLC method A** – This purification was performed on a Shimadzu model (LC-8A pump system) equipped with a diode array detector (type: SPD-M20A) and a Phenomenex Luna 10 u C18(2) 100 A AXIA (250 × 21.2 mm, 2 μm). The mobile phase was composed of H<sub>2</sub>O + 0.1 % TFA and acetonitrile (ACN). The mobile phase was changing as follows: 0.01–4 min isocratic 25 % ACN, 4–24 min gradient 25 % to 100 % ACN. The flow rate was 18 mL · min<sup>-1</sup>.

**Preparative HPLC method B** – This purification was performed on a Shimadzu model (LC-8A pump system) equipped with a diode array detector (type: SPD-M20A) and a Nucleodur C18 HTec VP250/10. The mobile phase was composed of H<sub>2</sub>O + 0.1 % TFA and ACN. The mobile phase was changing as follows: 0.01–4 min isocratic 25 % ACN, 4–24 min gradient 25 % to 100 % ACN. The flow rate was 5 mL · min<sup>-1</sup>.

**Preparative HPLC method C** – Separations were performed on a Shimadzu system consisting of a controller (SLC-10AVP), two pumps (LC-8A), and a UV-vis-detector (SPD-10AVP). Eluents used: CH<sub>3</sub>CN (A), water (B) containing 0.1 vol % TFA. The column used was a NUCLEODUR C18 Gravity 5 μm VP 250/16 and the following gradient was applied: 30 min 30–95 % acetonitrile, 20 min 95 % acetonitrile, 10 min 30 % acetonitrile. 0.1 % TFA. Flow rate: 10 mL · min<sup>-1</sup>. Detection at 220 nm.

**Amide-coupling on solid support method A** – A mixture of ethyl cyano(hydroxyimino)acetate (Oxyma Pure), 1-[(1-cyano-2-ethoxy-2-oxoethylideneamino)oxy] dimethylaminomorpholino] uronium hexafluorophosphate (COMU), diisopropyl ethyl amine (DIPEA) and the respective amino acid in 10 mL dimethylformamide (DMF) was added to the resin. The reaction was incubated rotating for the indicated amount of time until complete coupling was verified with the Kaiser test.

**Amide-coupling on solid support method B** – A solution of the respective (amino) acid, HBTU, HOBt and Et<sub>3</sub>NPr<sub>2</sub> in DMF (3 mL) was added to the resin and the mixture was shaken at room temperature for 2–3 h. The solvent was removed and the resin was washed with DMF (3 × 3 mL) and CH<sub>2</sub>Cl<sub>2</sub> (3 × 3 mL). After evaporation of the solvents, the resin was stored at -25 °C under N<sub>2</sub>-atmosphere.

**Kaiser test.** Three solutions were prepared: 1.) 1.7 mg KCN in 2.5 mL distilled water, 100 μL of this solution were mixed with 5 mL pyridine. 2.) 250 mg ninhydrin in 5 mL *n*-BuOH. 3.) 10 g Phenol in 5 mL *n*-BuOH. Some beads were removed after each coupling step and washed with DCM (2 × 1 mL). Two drops of each solution were added, and everything was heated to 110 °C. The color was compared with a negative and positive control after 5 minutes.

**Fmoc-Deprotection on solid support method A** – The resin was washed with DMF (2 × 10 min) and treated twice with piperidine (20 vol % in DMF, 3 × 3 min). The resin was washed three times with alternating DMF (10 mL) and isopropanol (10 mL).

**Fmoc-Deprotection on solid support method B** – The resin was swollen in DMF for 10 min and treated twice with piperidine (20 vol % in DMF, 5 min and 15 min). The resin was washed with DMF.

**Cleavage of the peptide from the solid-support method A** – The swollen resin was treated with a solution of hexafluoroisopropanol (10 vol % in CH<sub>2</sub>Cl<sub>2</sub>, 4 × 10 min). After each cleavage, the resin was washed with CH<sub>2</sub>Cl<sub>2</sub>

(4 × 5 min). The solvent was removed and the crude product was treated with water and saturated NaCl solution. After addition of CH<sub>2</sub>Cl<sub>2</sub>, the phases were separated and the organic layer was dried down. The crude was then purified using preparative HPLC (method A) to result in Boc- and *t*Bu-protected linear product.

**Cleavage of the peptide from the solid-support method B** – The swollen resin was treated with a solution of hexafluoroisopropanol (30 vol % in CH<sub>2</sub>Cl<sub>2</sub>, 3 × 30 min). After each cleavage, the resin was washed with CH<sub>2</sub>Cl<sub>2</sub> (3 × 30 min). Toluene was added to the combined filtrates and the solvents were evaporated under reduced pressure to yield the corresponding peptide.

**Determination of the half-life of thiolactone 1 using Ellman's reagent (ER)** – The protected thiolactone **1b** (0.3 mg) was dissolved in TFA (300 μL) to give a 1 mg · mL<sup>-1</sup> solution. The solution was aliquoted (100 μL) to wells of a 96-well plate to yield replicates and incubated for 30 minutes at room temperature. The samples were then dried under a stream of nitrogen and stored at 1 mbar at room temperature for 20 minutes to yield the crude thiolactone **1**. In the meantime, fresh 0.1 mM ER stock solution was prepared in 0.1 M phosphate buffer, pH 8 with 1 mM ethylenediaminetetraacetic acid (EDTA) and 10 % DMSO. The plate was then placed into a Varioscan plate reader (Thermo Fisher) and the reaction was initiated by adding 50 mM MOPS buffer (pH 7.11, 100 μL) and ER (100 μL) to the wells using the auto injector system. After shaking, the absorption at 412 nm was measured approximately 10 sec after the addition of ER over the time course of 30 minutes at 37 °C. The experiment was performed on three different days as described (to give three experiments), with the samples aliquoted to give three replicates in two cases and two replicates in one case (Figure S11). Along with the reaction measurements (a) and (b), the following controls were measured (Figure S30): (c) 0.5 mM cysteine with ER; (d) ER; (e) ER in 50 mM MOPS buffer, pH 7.11; (f) thiolactone **1** in 50 mM MOPS buffer (without ER), pH 7.11; (g) water; (h) 50 mM MOPS buffer, pH 7.11.

**General procedure for chemical probes** – The crude extracts were dissolved in MeOH (~50 μL). For the NaOH treatment, an equal volume of NaOH (1 M) was added. After 1 h at room temperature the solution was filtered and measured by HPLC-HRMS. For the maleimide treatment *N*-benzylmaleimide (10 % in MeCN, 1 μL) was added. After 1 h at room temperature the solution was filtered and measured by HPLC-HRMS.

**Solid phase peptide synthesis of Boc- and *t*Bu-protected linear peptide 1a:**

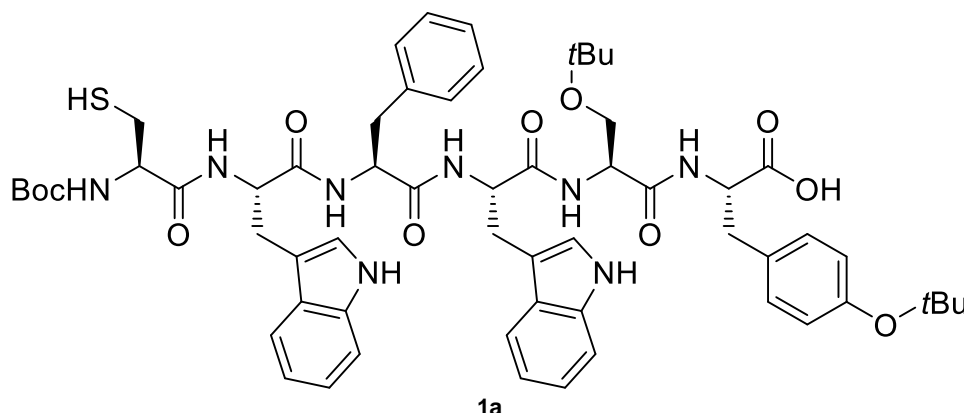

Solid phase peptide synthesis was used to synthesise the linear protected peptide. The resin (1 g) loaded with protected tyrosine (0.78 mmol) was incubated in 17 mL DMF for 15 hours in a syringe. For the coupling, the solvent was removed and a mixture of ethyl cyano(hydroxyimino)acetate (Oxyma Pure), COMU, DIPEA and the respective amino acid in 10 mL DMF was added to the resin. The reaction was incubated rotating for the indicated time (see Table S7) until complete coupling was verified with the kaiser test. After each coupling and Fmoc deprotection step some beads were removed and washed with DMF (2 × 1 mL) and DCM (2 × 1 mL). They were treated with 20 % HFIP in isopropanol (1 mL, 15 min) to cleave the peptide from the resin and the solution was analyzed by HPLC-MS method C. The Fmoc protecting group was fully removed and the correct amino acid sequence could be validated. For Fmoc deprotection and peptide cleavage methods A were used with the respective amounts and times for every coupling step. The combined fractions gave 1.3 g of crude peptide, from which 605.6 mg were then treated with 10 % TFA (2 mL) and 2 % triethylsilane in DCM for 5 min before addition of 10 % pyridine in MeOH (2 mL) to quench the reaction. The solvent was removed and the crude product was taken up in DCM and washed with water and saturated NaCl solution. The organic layer was evaporated to give 441 mg crude product. The crude was then purified using preparative HPLC (method A) to result in Boc- and *t*Bu-protected linear peptide **1a** (240 mg, 0.22 mmol, 28 %). <sup>1</sup>H-NMR (500 MHz, DMSO-*d*<sub>6</sub>): δ [ppm] = 12.73 (br, 1H), 10.75 (s, 1H), 10.70 (s, 1H), 8.14 (d, *J* = 7.7 Hz, 1H), 8.02 (d, *J* = 7.9 Hz, 1H), 7.99 (d, *J* = 7.9 Hz, 1H), 7.92–7.88 (m, 2H), 7.59 (d, *J* = 7.7 Hz, 1H), 7.53 (d, *J* = 7.7 Hz, 1H), 7.30 (t, *J* = 9.5 Hz, 2H), 7.20–7.10 (m, 8H), 7.06–7.00 (m, 3H), 6.96 (t, *J* = 7.3 Hz, 1H), 6.91 (t, *J* = 7.5 Hz, 1H), 6.83 (d, *J* = 8.3 Hz, 3H), 4.65 (dt, *J* = 10.5 Hz, *J* = 5.6 Hz, 1H), 4.56–4.52 (m, 2H), 4.47 (dt, *J* = 10.5 Hz, *J* = 6.2 Hz, 1H), 4.37 (dt, *J* = 9.6 Hz, *J* = 7.1 Hz, 1H), 4.00 (dt, *J* = 4.5 Hz, 10.1 Hz, 1H), 3.44–3.41 (m, 1H), 3.37 (dt, *J* = 7.7 Hz, *J* = 2.1 Hz, 1H), 3.14 (dt, *J* = 5.2 Hz, *J* = 14.9 Hz, 1H), 3.06–2.98 (m, 4H), 2.92–2.86 (m, 2H), 2.77 (dt, *J* = 11.5 Hz, *J* = 4.8 Hz, 1H), 2.66–2.60 (m, 1H), 2.54 (t, *J* = 8.3 Hz, 1H), 2.09 (t, *J* = 8.5 Hz, 1H), 1.36 (s, 9H), 1.22 (s, 9H), 1.07 (s, 9H). <sup>13</sup>C-NMR (75 MHz, DMSO-*d*<sub>6</sub>): δ [ppm] = 172.9, 171.5, 171.2, 170.4, 169.8, 155.7, 154.1, 138.0, 136.5, 132.2, 130.1, 129.6, 128.4, 127.9, 127.8, 126.6, 124.0, 123.9, 123.8, 121.3, 119.0, 118.9, 118.7, 118.6, 111.7, 111.7, 110.3, 110.3, 78.9, 78.1, 73.4, 62.1, 57.2, 54.2, 53.9, 53.7, 53.6, 38.1, 36.7, 29.0, 28.6, 27.6, 26.9. HRMS (ESI<sup>+</sup>-Orbitrap) *m/z* calculated for C<sub>59</sub>H<sub>74</sub>N<sub>8</sub>O<sub>11</sub>S<sup>+</sup>: 1,103.5271 [M+H]<sup>+</sup>; found: 1,103.5263 [M+H]<sup>+</sup>.

Solid phase peptide synthesis of Mmt-, Ac- and *t*Bu-protected linear peptide 4a: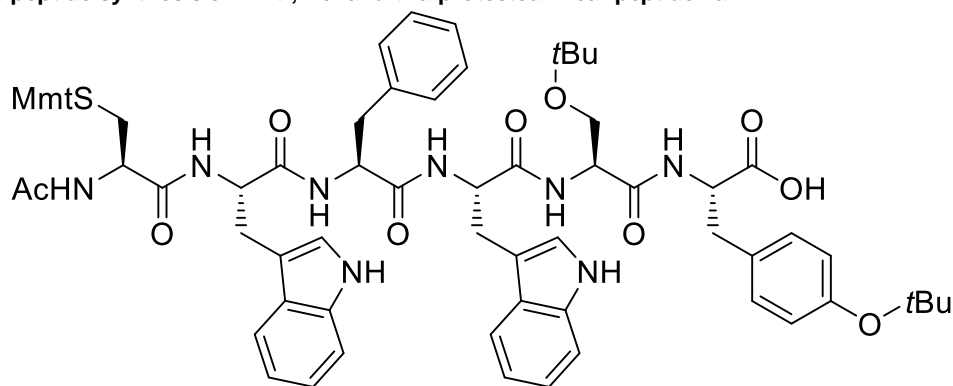

4a

2-Chlorotrityl chloride resin (1.00 g, 0.8 mmol,  $0.80 \text{ mmol} \cdot \text{g}^{-1}$ ) was washed with  $\text{CH}_2\text{Cl}_2$  ( $2 \times 10 \text{ mL}$ ), swollen in  $\text{CH}_2\text{Cl}_2$  (10 mL) and then shaken with Fmoc-Tyr(*t*Bu)-OH (368 mg, 800  $\mu\text{mol}$ ) and  $\text{Et}_3\text{N}/\text{Pr}_2$  (685  $\mu\text{L}$ , 4.00 mmol) in  $\text{CH}_2\text{Cl}_2/\text{DMF}$  (10 mL, 1:1 *v/v*) for 3 h. The resin was washed with  $\text{CH}_2\text{Cl}_2$  ( $3 \times 10 \text{ mL}$ ) and then treated with a solution of  $\text{CH}_2\text{Cl}_2/\text{MeOH}/\text{Et}_3\text{N}/\text{Pr}_2$  (10 mL, 17:2:1 *v/v/v*,  $3 \times 1 \text{ min}$ ). The solvent was removed and the resin was washed with  $\text{CH}_2\text{Cl}_2$  ( $4 \times 10 \text{ mL}$ ), DMF ( $4 \times 10 \text{ mL}$ ), and MeOH ( $4 \times 10 \text{ mL}$ ) and then dried under reduced pressure. The loading was determined to be  $0.68 \text{ mmol} \cdot \text{g}^{-1}$  by a test cleavage and measurement of the absorption of the formed piperidine-fulvene adduct.<sup>[2]</sup> The first four amino acids were connected using amide coupling and Fmoc deprotection methods B and the respective amounts and times. For the preparation of Ac protected peptide 4a, a part of the resin (after step A: 460 mg,  $0.48 \text{ mmol} \cdot \text{g}^{-1}$ , 221  $\mu\text{mol}$ ) was used. The resin was swollen and the Fmoc-group was cleaved as described in Fmoc-deprotection method B. Then, the resin was shaken with Fmoc-Cys(Mmt)-OH (544 mg, 880  $\mu\text{mol}$ ), HBTU (335 mg, 880  $\mu\text{mol}$ ) and HOBt (135 mg, 880  $\mu\text{mol}$ ) and  $\text{Et}_3\text{N}/\text{Pr}_2$  (302  $\mu\text{L}$ , 1.77 mmol) in DMF (4 mL) for 16 h. The resin was washed with DMF ( $4 \times 4 \text{ mL}$ ) and MeOH (4 mL) and dried under reduced pressure. The such obtained resin ( $527 \text{ mg}$ ,  $0.42 \text{ mmol} \cdot \text{g}^{-1}$ ) was split up ( $2 \times 260 \text{ mg}$ ,  $2 \times 109 \mu\text{mol}$ ). For both fractions, the *N*-terminal Fmoc group was cleaved as described in Fmoc-deprotection method B. Both batches of resin were washed with DMF ( $4 \times 4 \text{ mL}$ ) and MeOH (4 mL) and then dried under reduced pressure. For Ac protection of the *N*-terminal amino acid, the resin (260 mg,  $0.42 \text{ mmol} \cdot \text{g}^{-1}$ , 109  $\mu\text{mol}$ ) was shaken with  $\text{Ac}_2\text{O}/\text{DMF}/\text{pyridine}$  (1.8 mL, 1:3:2 *v/v/v*) for 2 h. The peptide was cleaved from the resin as described in GP3 to afford peptide 4a as a colorless solid which was used in the next step without further purification or characterization (123 mg, 93.3  $\mu\text{mol}$ , 86 %). HPLC-MS method B (ESI<sup>+</sup>):  $m/z = 1,318.1 [\text{M}+\text{H}]^+$ , 1,334.6  $[\text{M}+\text{NH}_4]^+$ .

Solid phase peptide synthesis of Mmt- and *t*Bu-protected linear peptide 5a: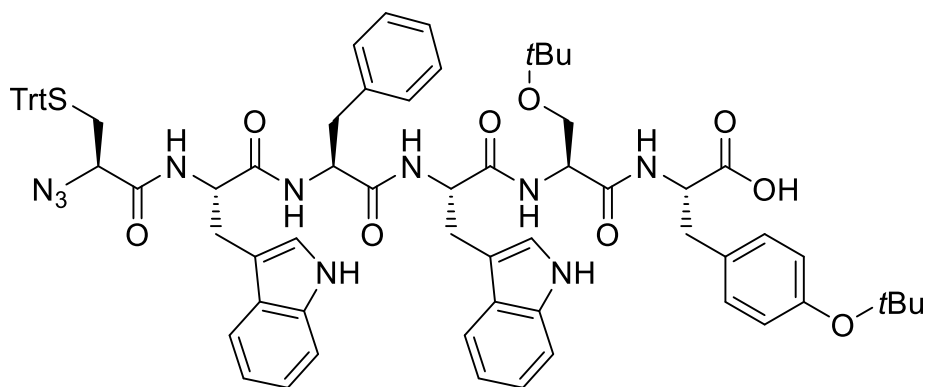

5a

2-Chlorotrityl chloride resin (1.00 g, 0.8 mmol,  $0.80 \text{ mmol} \cdot \text{g}^{-1}$ ) was washed with  $\text{CH}_2\text{Cl}_2$  ( $2 \times 10 \text{ mL}$ ), swollen in  $\text{CH}_2\text{Cl}_2$  (10 mL) and then shaken with Fmoc-Tyr(*t*Bu)-OH (368 mg, 800  $\mu\text{mol}$ ) and  $\text{Et}_3\text{N}/\text{Pr}_2$  (685  $\mu\text{L}$ , 4.00 mmol) in  $\text{CH}_2\text{Cl}_2/\text{DMF}$  (10 mL, 1:1 *v/v*) for 3 h. The resin was washed with  $\text{CH}_2\text{Cl}_2$  ( $3 \times 10 \text{ mL}$ ) and then treated with a solution of  $\text{CH}_2\text{Cl}_2/\text{MeOH}/\text{Et}_3\text{N}/\text{Pr}_2$  (10 mL, 17:2:1 *v/v/v*,  $3 \times 1 \text{ min}$ ). The solvent was removed and the resin was washed with  $\text{CH}_2\text{Cl}_2$  ( $4 \times 10 \text{ mL}$ ), DMF ( $4 \times 10 \text{ mL}$ ), and MeOH ( $4 \times 10 \text{ mL}$ ) and then dried under reduced pressure. The loading was determined to be  $0.68 \text{ mmol} \cdot \text{g}^{-1}$  by a test cleavage and measurement of the absorption of the formed piperidine-fulvene adduct.<sup>[2]</sup> The first four amino acids were connected using amide coupling and Fmoc deprotection methods B and the respective amounts and times. For the preparation of peptide 5a the resin (after step A: 250 mg,  $0.48 \text{ mmol} \cdot \text{g}^{-1}$ , 120  $\mu\text{mol}$ ) was shaken with (*R*)-2-azido-3-(tritylthio)propanoic acid (187 mg, 480  $\mu\text{mol}$ ), HBTU (182 mg, 480  $\mu\text{mol}$ ) and HOBt (73.5 mg, 480  $\mu\text{mol}$ ) and  $\text{Et}_3\text{N}/\text{Pr}_2$  (164  $\mu\text{L}$ , 960  $\mu\text{mol}$ ) in DMF (4 mL) for 16 h. The resin was washed with DMF ( $4 \times 4 \text{ mL}$ ) and  $\text{CH}_2\text{Cl}_2$  ( $4 \times 4 \text{ mL}$ ). The peptide was then cleaved from the resin as described in cleavage method B. Flash chromatography (25 g silica, petrol ether/acetone/ $\text{HCOOH}$  1:1:1 *v/v/v*) afforded peptide 5a as a colorless solid (113 mg, 88.9  $\mu\text{mol}$ , 74 %, *d.r.* = 3:2). <sup>1</sup>H-NMR (methanol-*d*<sub>4</sub>, 400 MHz):  $\delta$  [ppm] = 7.52 (d,  $J = 8.3 \text{ Hz}$ , 1H), 7.48 (d,  $J = 5.6 \text{ Hz}$ , 1H), 7.37–7.32 (m, 6H), 7.29 (d,  $J = 10.7 \text{ Hz}$ , 2H), 7.26–7.20 (m, 6H), 7.20–7.15 (m, 3H), 7.12–7.03 (m, 8H),



7.01–6.91 (m, 5H), 6.86 (d,  $J = 8.4$  Hz, 2H), 4.66 (m, 2H), 4.53 (m, 2H), 4.38 (m, 1H), 3.52 (td,  $J = 9.1, 4.6$  Hz, 1H), 3.29–2.97 (m, 8H), 2.90 (m, 1H), 2.70 (m, 1H), 2.55 (m, 1H), 2.44 (dd,  $J = 13.2, 8.4$  Hz, 0.4H), 2.33 (dd,  $J = 13.2, 8.0$  Hz, 0.6H), 1.25 (s, 9H), 1.08 (s, 5.3H), 1.07 (s, 3.6H) ppm.  $^{13}\text{C}$ -NMR (methanol- $d_4$ , 101 MHz):  $\delta = 174.1, 173.54, 173.45, 173.2, 173.11, 173.08, 171.7, 170.2, 170.1, 155.3, 145.7, 138.01, 137.97, 133.2, 131.0, 130.7, 130.32, 130.28, 129.5, 129.4, 129.1, 128.8, 128.8, 128.0, 127.7, 125.2, 124.7, 122.6, 122.5, 120.0, 119.9, 119.5, 119.4, 112.4, 110.8, 110.6, 110.32, 110.25, 79.5, 74.9, 68.3, 68.2, 63.2, 63.2, 62.5, 62.5, 56.0, 55.7, 55.6, 55.5, 55.4, 55.2, 55.0, 54.9, 38.4, 37.8, 35.1, 29.2, 28.6, 27.7$  ppm. HRMS (ESI $^{+}$ -TOF):  $m/z$  calculated for  $\text{C}_{73}\text{H}_{79}\text{N}_{10}\text{O}_9\text{S}^{+}$ : 1,271.5747 [M+H] $^{+}$ ; found: 1,271.5746 [M+H] $^{+}$ .

#### Synthesis of cyclic peptide 1b:

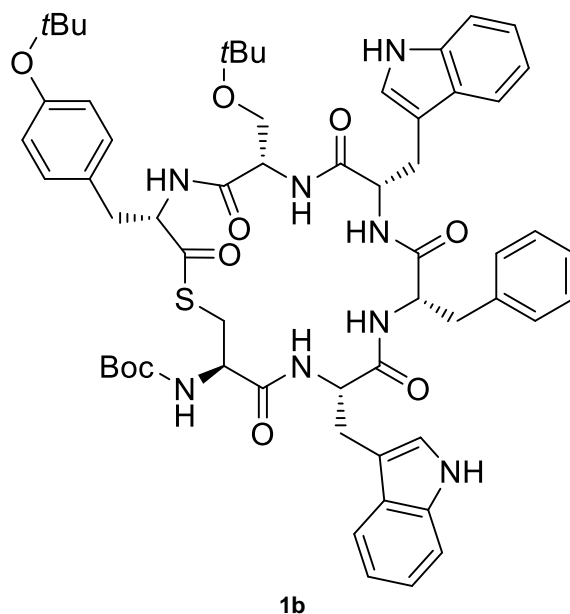

The thiolactone formation was performed using the purified compound **1a** (135.6 mg; 0.123 mmol), 1-hydroxybenzotriazole hydrate (HOBt, 63.5 mg; 0.415 mmol; 3.4 eq.), *N*-ethyl-*N'*-(3-dimethylaminopropyl)carbodiimide hydrochloride (EDCI, 129.4 mg; 0.675 mmol; 5.5 eq.), DIPEA (127  $\mu\text{L}$ , 1.324 mmol; 10.8 eq.) and *N,N*-dimethylpyridine-4-amine (DMAP, 92.6 mg, 0.76 mmol, 6.2 eq.) and dissolving all in 140 mL DMF. The reaction was stirred at 20 °C until no starting material could be detected using HPLC-MS method C (~ 21 h). The thiolactone was then purified using preparative HPLC (method B) to yield compound **1b** (43.8 mg, 32 % yield).  $^1\text{H}$ -NMR (500 MHz, DMSO- $d_6$ ):  $\delta$  [ppm] = 10.91 (s, 1H), 10.75 (s, 1H), 9.08 (d,  $J = 4.1$  Hz, 1H), 8.50 (dt,  $J = 10.9$  Hz,  $J = 4.2$  Hz, 2H), 7.47 (d,  $J = 8.0$  Hz, 1H), 7.44 (d,  $J = 7.9$  Hz, 1H), 7.35 (d,  $J = 7.9$  Hz, 2H), 7.30 (d,  $J = 8.2$  Hz, 2H), 7.27 (d,  $J = 8.3$  Hz, 2H), 7.19–7.09 (m, 7H), 7.03 (q,  $J = 7.4$  Hz, 2H), 6.97 (2d,  $J = 7.4$  Hz,  $J = 7.1$  Hz, 2H), 6.90 (d,  $J = 8.3$  Hz, 2H), 4.73 (q,  $J = 7.6$  Hz, 1H), 4.51–4.43 (m, 2H), 4.10 (s, 1H), 4.06–4.00 (m, 2H), 3.69 (dt,  $J = 6.8$  Hz,  $J = 3.3$  Hz, 1H), 3.33–3.20 (m, 3H), 3.14 (dd,  $J = 14.1$  Hz,  $J = 2.9$  Hz, 1H), 2.99–2.83 (m, 6H), 2.62 (dt,  $J = 7.2$  Hz,  $J = 5.1$  Hz, 1H), 1.40 (s, 9H), 1.28 (s, 9H), 0.86 (s, 9H),  $^{13}\text{C}$ -NMR (125 MHz, DMSO- $d_6$ ):  $\delta$  [ppm] = 202.3, 171.2, 171.2, 171.1, 170.5, 169.6, 155.1, 154.2, 137.3, 136.8, 136.6, 132.6, 130.1, 129.9, 128.4, 127.6, 127.5, 126.9, 123.7, 123.4, 121.7, 121.4, 118.9, 118.7, 118.5, 118.3, 112.0, 111.8, 110.4, 110.2, 78.9, 78.0, 72.8, 61.8, 60.4, 55.1, 54.6, 53.9, 53.4, 39.1, 36.6, 29.1, 28.8, 28.6, 27.4, 25.9. HRMS (ESI $^{+}$ -Orbitrap)  $m/z$  calculated for  $\text{C}_{59}\text{H}_{73}\text{N}_8\text{O}_{10}\text{S}^{+}$ : 1,085.5165 [M+H] $^{+}$ ; found: 1,085.5155 [M+H] $^{+}$ .

Synthesis of fully unprotected thiolactone **1**: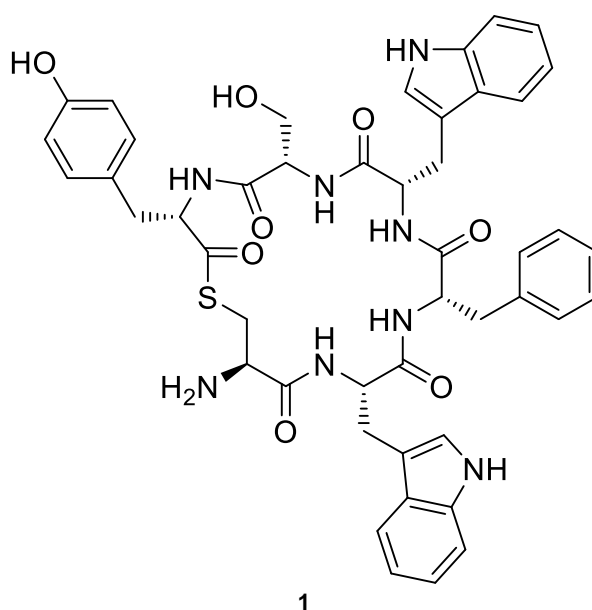**1**

The thiolactone **1b** (19.8 mg, 0.018 mmol) was treated with 95 % TFA in DCM (1 mL) for 1 h for deprotection of the hydroxy groups and the amine. The solvent was removed under a stream of nitrogen and the crude product was obtained as a yellow oil. It was handled under acidic conditions only, to sustain the thioester bond. The crude product was then purified using preparative HPLC (method B, but with 0.5 % TFA in solvent A and B. Additionally, TFA (4 mL) was added to each fraction.) to yield peptide **1** (6 mg, 38 % yield). ( $^1\text{H-NMR}$  (500 MHz,  $\text{MeOD-d}_4$  + 1 % TFA-d):  $\delta$  [ppm] = 8.34 (br, 0.2H), 8.12–8.06 (m, 1H), 7.52 (t,  $J$  = 8.3 Hz, 2H), 7.33 (dt,  $J$  = 9.3 Hz,  $J$  = 2.9 Hz, 2H), 7.19–7.06 (m, 8H), 7.02–6.99 (m, 4H), 6.93 (s, 1H), 6.76 (d,  $J$  = 8.5 Hz, 2H), 4.83–4.79 (m, 1H), 4.43 (br, 1H), 4.33 (t,  $J$  = 5.6 Hz,  $J$  = 4.3 Hz, 1H), 4.18–4.13 (m, 2H), 4.05 (t,  $J$  = 7.0 Hz, 1H), 3.80 (d,  $J$  = 13.8 Hz, 1H), 3.68 (dd,  $J$  = 11.8 Hz,  $J$  = 4.3 Hz, 1H), 3.63 (dd,  $J$  = 11.2 Hz,  $J$  = 6.8 Hz, 1H), 3.47 (d,  $J$  = 3.5 Hz, 2H), 3.35 (dd,  $J$  = 13.8 Hz,  $J$  = 3.9 Hz, 1H), 3.23 (dt,  $J$  = 13.62 Hz,  $J$  = 4.3 Hz, 1H), 3.15 (dt,  $J$  = 12.1 Hz,  $J$  = 3.1 Hz, 1H), 3.06–3.00 (m, 3H), 2.87 (dt,  $J$  = 11.4 Hz,  $J$  = 4.8 Hz, 1H),  $^{13}\text{C-NMR}$  (125 MHz,  $\text{MeOH-d}_4$  + 1 % TFA-d):  $\delta$  [ppm] = 201.0, 175.7, 174.1, 173.7, 168.6, 157.9, 139.8, 138.7, 138.7, 132.1, 130.8, 130.1, 129.6, 128.98, 128.95, 128.23, 125.4, 125.1, 123.3, 123.1, 120.6, 120.4, 119.8, 119.6, 116.9, 113.1, 113.0, 111.8, 110.5, 62.8, 62.5, 59.9, 58.3, 58.2, 56.9, 53.9, 38.1, 37.4, 29.8, 29.4, 27.2. HRMS (ESI $^+$ -Orbitrap)  $m/z$  calculated for  $\text{C}_{46}\text{H}_{49}\text{N}_9\text{O}_6\text{S}^+$ : 873.3389 [M+H] $^+$ ; found: 873.3378 [M+H] $^+$ .

Synthesis of cyclopeptide **2**: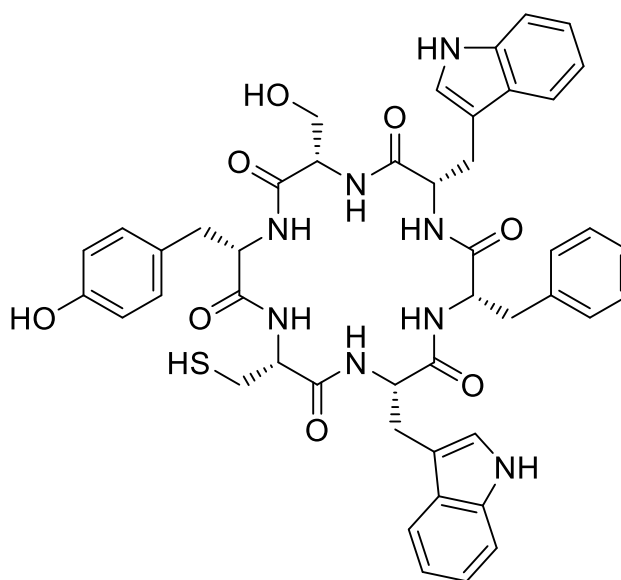**2**

Peptide **1** (6 mg) was left in 50 mM MOPS, pH 7 for 2 h to fully rearrange into the cyclopeptide **2**. The pure compound was obtained using preparative HPLC (method B) in yield of 23 % as a colorless powder.  $^1\text{H-NMR}$  (500 MHz,  $\text{DMSO-d}_6$ ):  $\delta$  [ppm] = 10.85 (s, 1H), 10.83 (s, 1H), 8.12 (q,  $J$  = 7.4 Hz, 2H), 8.03–7.94 (m, 4H), 7.61 (d,  $J$  = 7.9 Hz, 1H), 7.51 (d,  $J$  = 7.9 Hz, 1H), 7.34 (dd,  $J$  = 8.3 Hz,  $J$  = 1.7 Hz, 2H), 7.19 (s, 1H), 7.14–7.11 (m, 3H), 7.09–7.06 (m, 3H), 7.03–6.99 (m, 4H), 6.97–6.95 (m, 2H), 6.66 (d,  $J$  = 8.0 Hz, 2H), 4.38 (dt,  $J$  = 10.2 Hz,  $J$  = 6.2 Hz, 1H), 4.25 (q,  $J$  = 7.1 Hz, 1H), 3.13–

4.04 (m, 4H), 3.61 (s, 2H), 3.18 (d,  $J = 9.5$  Hz, 1H), 3.15 (d,  $J = 8.8$  Hz, 1H), 3.03–2.89 (m, 5H), 2.85–2.75 (m, 3H), 2.02 (t,  $J = 8.5$  Hz, 1H),  $^{13}\text{C-NMR}$  (125 MHz,  $\text{DMSO-d}_6$ ):  $\delta$  [ppm] = 171.6, 171.5, 171.1, 171.0, 170.5, 169.7, 156.3, 138.3, 136.6, 130.5, 129.4, 128.6, 128.4, 127.9, 127.6, 126.7, 124.1, 124.0, 121.5, 121.4, 118.8, 118.7, 118.6, 115.5, 111.9, 110.7, 110.5, 110.4, 61.3, 56.6, 56.4, 55.4, 54.9, 40.6, 40.5, 40.4, 40.3, 40.2, 40.1, 40.0, 39.9, 39.8, 39.74, 39.67, 39.51, 36.7, 35.6, 27.2, 25.7. HRMS (ESI<sup>+</sup>-Orbitrap)  $m/z$  calculated for  $\text{C}_{46}\text{H}_{49}\text{N}_8\text{O}_8\text{S}^+$ : 873.3389 [M+H]<sup>+</sup>; found: 873.3398 [M+H]<sup>+</sup>.

### Solid phase peptide synthesis of unprotected linear peptide 3:

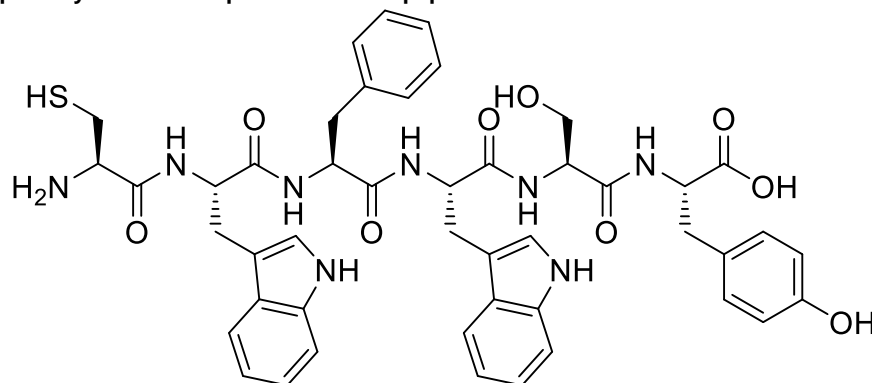

3

The protected thiolactone **1b** (9 mg, 0.0083 mmol) was dissolved in MeOH (1 mL), NaOH (50  $\mu\text{L}$ , 1 M) was added, and the solution was stirred at 50 °C for 120 min. The solvent was then evaporated and the crude was dissolved in TFA (1 mL) for 60 min and the reaction was again stirred for 60 min at 50 °C before subjecting it to the preparative HPLC using method B. The title compound was obtained in a yield of 15 %.  $^1\text{H NMR}$  (500 MHz,  $\text{DMSO-d}_6$ ):  $\delta$  [ppm] = 10.76 (s, 1H), 10.75 (s, 1H), 9.19 (s, 1H), 8.43 (s, 1H), 8.24 (d,  $J = 8.2$  Hz, 1H), 8.17 (d,  $J = 7.8$  Hz, 1H), 8.05 (d,  $J = 7.8$  Hz, 1H), 7.94 (d,  $J = 7.6$  Hz, 1H), 7.62 (d,  $J = 7.9$  Hz, 2H), 7.31 (d,  $J = 8.1$  Hz, 2H), 7.19 (s, 3H), 7.15 (s, 1H), 7.09 (s, 1H), 7.04 (t,  $J = 7.6$  Hz, 2H), 7.00 (d,  $J = 8.3$  Hz, 2H), 6.94 (td,  $J = 7.4$  Hz, 4.8, 2H), 6.65 (d,  $J = 8.4$  Hz, 2H), 4.64 (td,  $J = 8.0$  Hz, 5.0, 1H), 4.57 (td,  $J = 8.5$  Hz, 4.2, 2H), 4.38 (tq,  $J = 10.3$  Hz, 5.8, 2H), 3.77 (d,  $J = 6.5$  Hz, 1H), 3.56 (dt,  $J = 7.9$  Hz, 4.0, 2H), 3.16 (dd,  $J = 14.9$  Hz, 5.0, 1H), 3.08 (dd,  $J = 15.0$  Hz,  $J = 4.5$  Hz, 1H), 3.05–2.96 (m, 2H), 2.92 (dd,  $J = 13.9$  Hz,  $J = 5.7$  Hz, 1H), 2.86 (dd,  $J = 19.3$  Hz, 6.5, 1H), 2.83–2.72 (m, 2H).  $^{13}\text{C NMR}$  (126 MHz,  $\text{DMSO-d}_6$ )  $\delta$  [ppm] = 172.7, 171.3, 170.9, 170.8, 169.7, 155.9, 137.7, 136.1, 136.0, 130.1, 129.2, 128.0, 127.4, 127.2, 126.1, 123.68, 123.63, 120.9, 120.8, 118.5, 118.2, 115.0, 111.23, 111.18, 109.9, 109.7, 61.7, 55.0, 53.9, 53.8, 53.5, 53.3, 37.5, 36.1, 27.8, 27.7, 26.0. HRMS (ESI<sup>+</sup>-Orbitrap)  $m/z$  calculated for  $\text{C}_{46}\text{H}_{50}\text{N}_8\text{O}_9\text{S}^+$ : 891.3494 [M+H]<sup>+</sup>; found: 891.3493 [M+H]<sup>+</sup>.

### Synthesis of cyclic peptide 4:

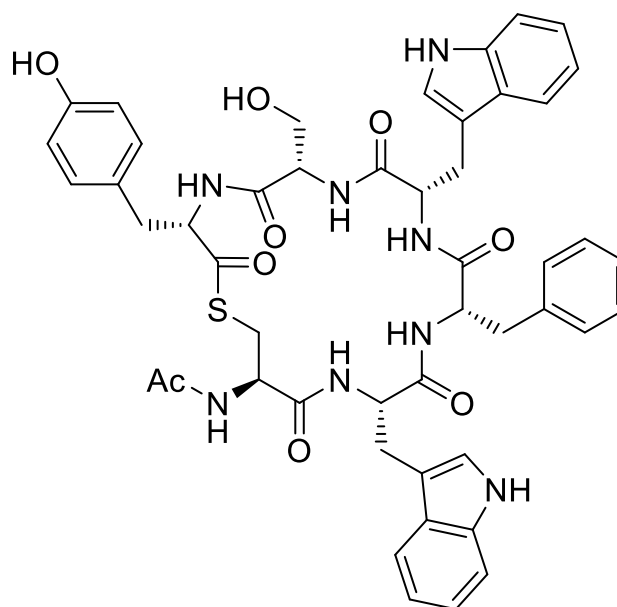

4

TFA (150  $\mu\text{L}$ ) and  $\text{Et}_3\text{SiH}$  (225  $\mu\text{L}$ ) were added to a solution of carboxylic acid **4a** (123 mg, 93.1  $\mu\text{mol}$ ) in  $\text{CH}_2\text{Cl}_2$  (5 mL) and the solution was stirred 2 h at room temperature. Toluene (5 mL) was added and all volatile components were removed under reduced pressure to afford the  $\omega$ -mercapto carboxylic acid. Solutions of PyBOP (58.2 mg, 112  $\mu\text{mol}$ ) and the  $\omega$ -mercapto carboxylic acid in  $\text{CH}_2\text{Cl}_2/\text{DMF}$  (each 19 mL, 4.4:1 v/v) were given to a solution of  $\text{Et}_3\text{NPr}_2$  (31.9  $\mu\text{L}$ ,

186  $\mu\text{mol}$  in  $\text{CH}_2\text{Cl}_2$  (20 mL) over 4 h via a syringe pump. The solution was stirred 24 h at room temperature. Toluene (10 mL) was added and the solvents were removed under reduced pressure. TFA/ $\text{Et}_3\text{SiH}/\text{H}_2\text{O}$  (3 mL, 95:2.5:2.5 v/v/v) were added to the crude peptide and the mixture was stirred 3 h at room temperature. The solvents were removed under reduced pressure. Preparative HPLC of the residue (method C) afforded cyclopeptide **4** as a colorless solid (8.37 mg, 9.15  $\mu\text{mol}$ , 9.8 %).  $^1\text{H-NMR}$  ( $\text{DMSO-d}_6$ , 400 MHz):  $\delta$  [ppm] = 10.88 (s, 1H), 10.78 (s, 1H), 9.21 (s, 1H), 9.08 (d,  $J$  = 5.8 Hz, 1H), 8.57 (dd,  $J$  = 11.2 Hz,  $J$  = 8.8 Hz, 2H), 8.28 (d,  $J$  = 8.7 Hz, 1H), 7.94 (d,  $J$  = 6.8 Hz, 1H), 7.55 (d,  $J$  = 7.7 Hz, 1H), 7.39–7.33 (m, 2H), 7.27 (t,  $J$  = 9.3 Hz, 2H), 7.25–7.05 (m, 10H), 7.05–7.00 (m, 2H), 6.97–6.91 (m, 2H), 6.69 (t,  $J$  = 10.3 Hz, 2H), 4.75 (dd,  $J$  = 14.3 Hz,  $J$  = 8.5 Hz, 1H), 4.48–4.39 (m, 1H), 4.38–4.31 (m, 1H), 4.31–4.24 (m, 1H), 4.08 (s, 1H), 4.00 (dt,  $J$  = 11.0 Hz,  $J$  = 5.5 Hz, 1H), 3.75 (dd,  $J$  = 11.1 Hz,  $J$  = 6.8 Hz, 1H), 3.61 (dd,  $J$  = 10.9 Hz,  $J$  = 3.8 Hz, 1H), 3.23–3.16 (m, 1H), 3.12–2.98 (m, 3H), 2.92 (m, 2H), 2.78 (m, 2H), 2.67 (m, 2H), 1.79 (s, 3H) ppm.  $^{13}\text{C-NMR}$  ( $\text{DMSO-d}_6$ , 150 MHz, 297 K):  $\delta$  [ppm] = 202.4, 171.5, 171.4, 170.9, 170.3, 170.1, 169.0, 156.4, 137.3, 136.7, 136.4, 130.7, 130.0, 128.4, 128.1, 127.7, 127.3, 126.8, 123.8, 123.8, 121.5, 121.3, 118.8, 118.8, 118.6, 118.2, 115.5, 111.9, 111.7, 110.5, 110.4, 62.2, 60.3, 56.7, 55.7, 55.0, 53.1, 52.2, 36.8, 28.8, 28.4, 26.4, 25.7, 22.7 ppm. HRMS ( $\text{ESI}^+$ -TOF)  $m/z$  calculated for  $\text{C}_{48}\text{H}_{51}\text{N}_8\text{O}_9\text{S}^+$ : 915.3494  $[\text{M}+\text{H}]^+$ ; found 915.3498  $[\text{M}+\text{H}]^+$ .

#### Synthesis of cyclic peptide **5**:

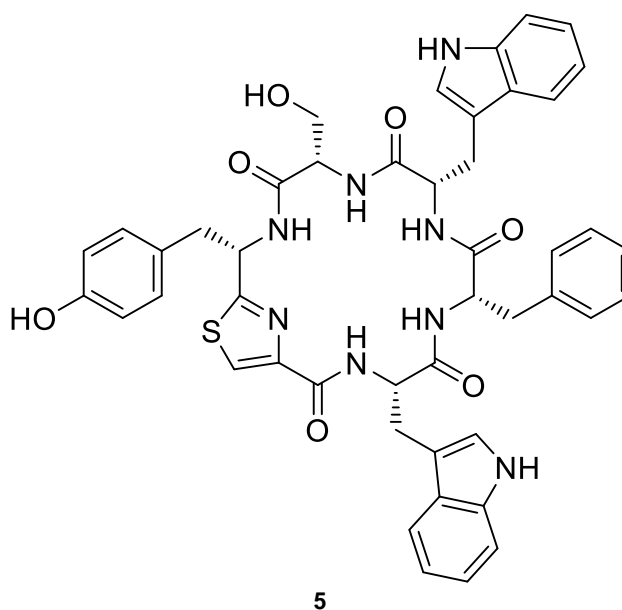

TFA (50  $\mu\text{L}$ ) and  $\text{Et}_3\text{SiH}$  (125  $\mu\text{L}$ ) were added to a solution of carboxylic acid **5a** (46.0 mg, 36.2  $\mu\text{mol}$ ) in  $\text{CH}_2\text{Cl}_2$  (5 mL) and the solution was stirred 2 h at room temperature. Toluene (5 mL) was added and all volatile components were removed under reduced pressure to afford the  $\omega$ -mercapto carboxylic acid. Solutions of PyBOP (28.2 mg, 54.3  $\mu\text{mol}$ ) and the  $\omega$ -mercapto carboxylic acid in  $\text{CH}_2\text{Cl}_2/\text{DMF}$  (each 7.4 mL, 4.4:1 v/v) were given to a solution of  $\text{EtNPr}_2$  (12.4  $\mu\text{L}$ , 72.4  $\mu\text{mol}$ ) in  $\text{CH}_2\text{Cl}_2$  (7.8 mL) over 4 h via a syringe pump. The solution was stirred 24 h at room temperature. Toluene (10 mL) was added and the solvents were removed under reduced pressure. Flash chromatography (25 g silica,  $\text{CH}_2\text{Cl}_2/\text{PrOH}$  9:1) of the residue afforded the crude thiolactone that was used in the following step without any further characterization. The residue was solved in 2,6-lutidine (1 mL) and  $\text{PPh}_3$  (14.2 mg, 54.1  $\mu\text{mol}$ ) was added. The solution was stirred at 60  $^\circ\text{C}$  for 6 h. The solvent was removed under reduced pressure and the residue was solved in  $\text{CH}_2\text{Cl}_2$  (1 mL). At  $-10$   $^\circ\text{C}$ , DBU (26.9  $\mu\text{L}$ , 180  $\mu\text{mol}$ ) and  $\text{BrCCl}_3$  (17.8  $\mu\text{L}$ , 180  $\mu\text{mol}$ ) were added and the solution was stirred 4 h to reach room temperature. The volatile components were removed under reduced pressure and the residue was stirred in TFA/ $\text{Et}_3\text{SiH}/\text{H}_2\text{O}$  (1 mL, 95:2.5:2.5 v/v/v) for 2 h. The solvent was removed under reduced pressure and the residue was purified by preparative HPLC (method C) to afford thiazole **5** as a colorless solid (7.40 mg, 7.67  $\mu\text{mol}$ , 21 %).  $^1\text{H-NMR}$  ( $\text{MeCN-d}_3$ , 600 MHz):  $\delta$  [ppm] = 9.20 (d,  $J$  = 9.7 Hz, 2H), 8.02 (d,  $J$  = 8.1 Hz, 1H), 7.88 (s, 1H), 7.70 (d,  $J$  = 7.7 Hz, 1H), 7.62 (d,  $J$  = 8.3 Hz, 1H), 7.40 (dd,  $J$  = 8.1, 3.9 Hz, 3H), 7.35 (s, 1H), 7.16–7.10 (m, 7H), 7.06 (m, 3H), 6.90 (d,  $J$  = 7.6 Hz, 3H), 6.86 (d,  $J$  = 5.8 Hz, 2H), 6.69 (d,  $J$  = 8.4 Hz, 2H), 5.24 (d,  $J$  = 6.2 Hz, 1H), 4.79 (d,  $J$  = 8.8 Hz, 1H), 4.25 (d,  $J$  = 6.1 Hz, 2H), 4.06–4.01 (m, 1H), 3.68 (s, 1H), 3.54–3.44 (m, 2H), 3.32 (dd,  $J$  = 14.7 Hz,  $J$  = 6.3 Hz, 1H), 3.28–3.17 (m, 4H), 3.05 (dd,  $J$  = 13.2 Hz,  $J$  = 3.8 Hz, 1H), 2.99 (dd,  $J$  = 13.1 Hz,  $J$  = 5.5 Hz, 1H), 2.94–2.84 (m, 2H) ppm.  $^{13}\text{C-NMR}$  ( $\text{MeCN-d}_3$ , 150 MHz):  $\delta$  [ppm] = 172.3, 172.2, 172.0, 170.7, 169.5, 161.8, 156.7, 150.4, 138.2, 137.5, 132.7, 131.5, 130.4, 129.7, 129.6, 129.4, 129.2, 128.5, 127.6, 124.9, 124.6, 124.4, 122.7, 122.6, 122.5, 120.1, 119.7, 119.5, 116.1, 112.4, 111.2, 110.8, 62.1, 57.2, 56.6, 56.1, 55.7, 53.7, 40.8, 37.6, 28.4, 27.6 ppm. HRMS ( $\text{ESI}^+$ -TOF)  $m/z$  calculated for  $\text{C}_{46}\text{H}_{45}\text{N}_8\text{O}_7\text{S}^+$ : 853.3126  $[\text{M}+\text{H}]^+$ ; found 853.3150  $[\text{M}+\text{H}]^+$ .

**Figure S1. AIP biosynthetic loci identified in the *R. cellulolyticum* genome.** Representation of the four putative AIP biosynthetic gene clusters identified in the *R. cellulolyticum* genome (see Table S1). The key (below) indicates the encoded protein products: AgrD, precursor peptide; AgrB, macrocyclase; AgrC, sensor kinase; AgrA; response regulator. No gene encoding a leader peptidase is depicted since the enzyme responsible for leader peptide removal in clostridial AIP biosynthesis remains unknown. The locus tags for the genes encoding the putative AgrD precursor peptides (*Rc*-AIP1–4) are displayed for each cluster. The predicted core peptide sequences (see Figure S2) are surrounded by brown boxes, with the cysteine residues at the putative cyclization positions underlined.

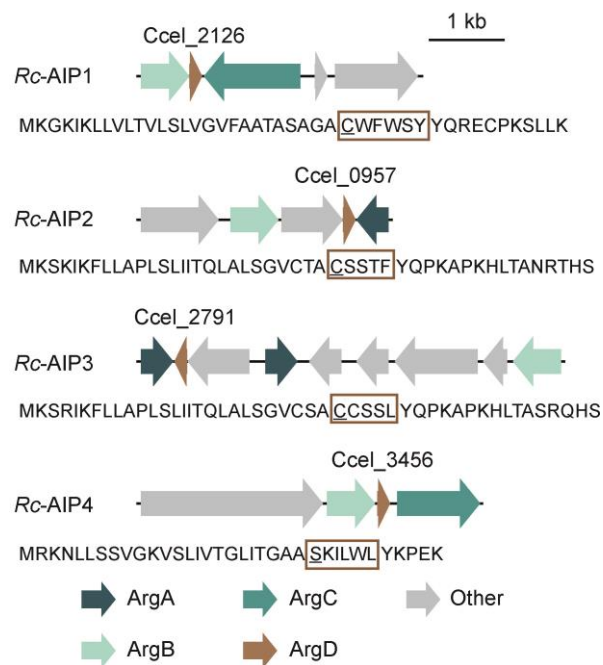

**Figure S2. Prediction of the core peptide sequences for *R. cellulolyticum* AgrD1–4.** **A)** WebLogo of structurally characterized AIPs. Although the sequences of the precursor peptides are highly divergent, two features are universally conserved: an ExxxP ArgB recognition motif in the follower peptide and a cyclizable residue (Cys or Ser) ten amino acids upstream of the conserved proline. The (thio)lactone macrocycle is formed between residues 43 and 47. See Table S6 for the identity of the sequences used to generate the WebLogo diagram. **B)** Alignment of *Rc*-AgrD1–4 to the structurally characterized AIPs from *Staphylococcus aureus*. The conserved proline in the AgrB recognition sequence and the (thio)lactone-forming residues are colored orange and blue, respectively. Amino acids comprising the *N*-terminal extensions on the thiolactone-containing macrocycles of structurally verified AIPs are underlined.

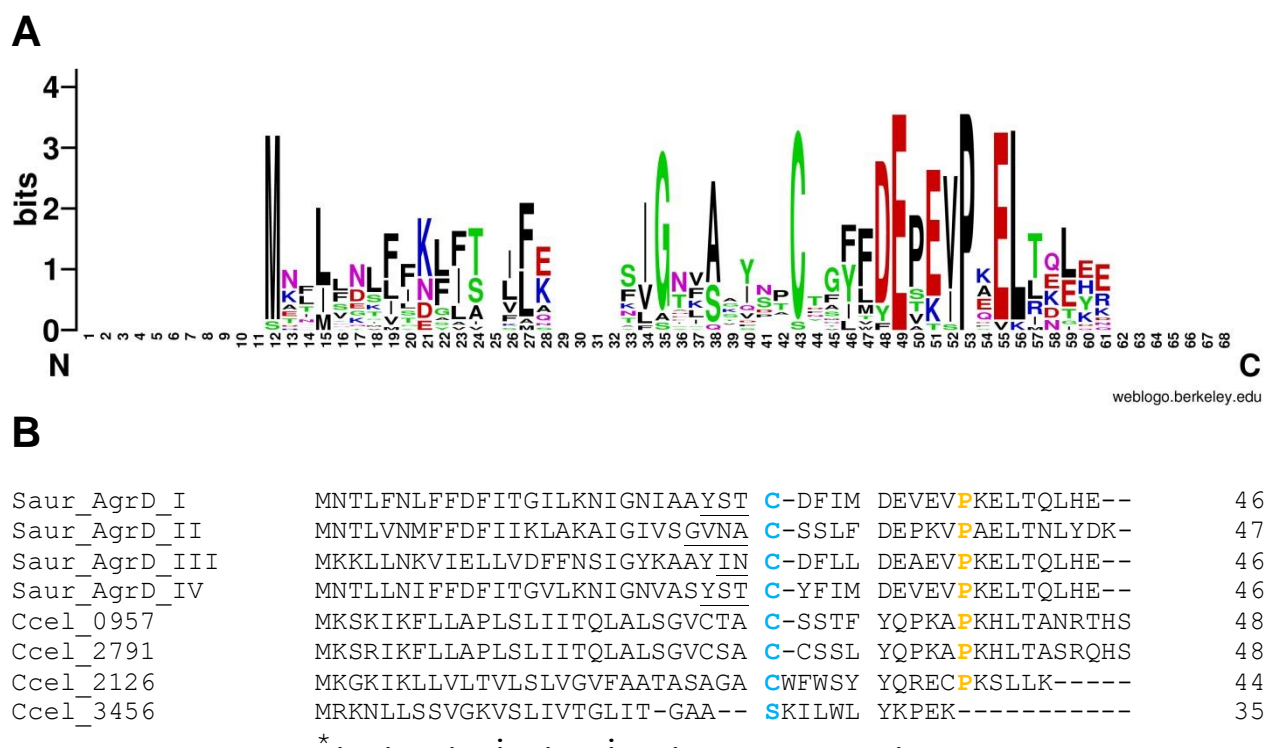

**Figure S3. HPLC-HRMS detection of *Rc*-AIP1, an AIP produced by *R. cellulolyticum*.** Extracted ion chromatograms (EICs) (HPLC-HRMS method B) showing the detection of the mass consistent with the prediction for mature *Rc*-AIP1 lacking an *N*-terminal extension (NTE) (calc.  $m/z$  873.3389  $[M+H]^+$ ; found  $m/z$  873.3398)  $[M+H]^+$  in the metabolite profile of *R. cellulolyticum*. No signals were observed corresponding to the predicted exact masses of *Rc*-AIP1 bearing NTEs of 1–4 residues. The core peptide sequence for *Rc*-AIP1 is depicted surrounded by a brown box, with the cysteine residue at the putative cyclization position underlined. Residues shown outside the box form the hypothetical NTEs.

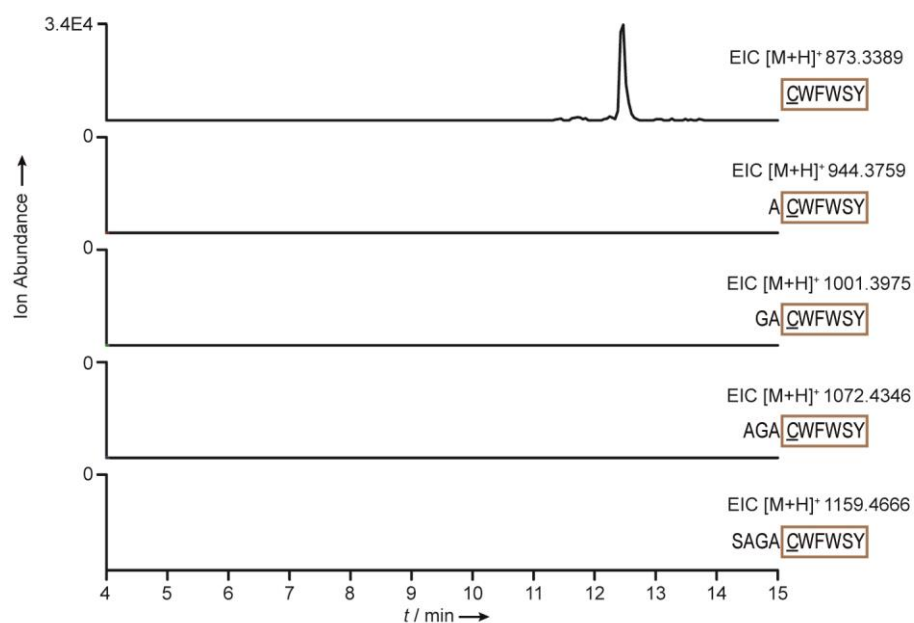

**Figure S4. HRMS<sup>2</sup>-based fragmentation of candidate AIPs and the synthetic reference cyclopeptide 2.** **A)** HRMS<sup>2</sup>-based fragmentation (HPLC-HRMS method A) of *Rp*-AIP1 (18 NCE, *m/z* 873.3389 [M+H]<sup>+</sup>) detected in a crude extract from *R. papyrosolvens*. The fragmentation pattern is representative of those also observed for the synthetic reference cyclopeptide 2, as well as *Rc*-AIP1 and *Rj*-AIP1 detected in crude extracts from *R. cellulolyticum* and *R. josui*, respectively (Figure S14). All observed fragment masses were in agreement with a cyclopeptide of amino acid sequence CWFWSY (see Panel B and C). **B)** Shown are possible ions. **C)** Listed are exact masses and respective sum formulas.

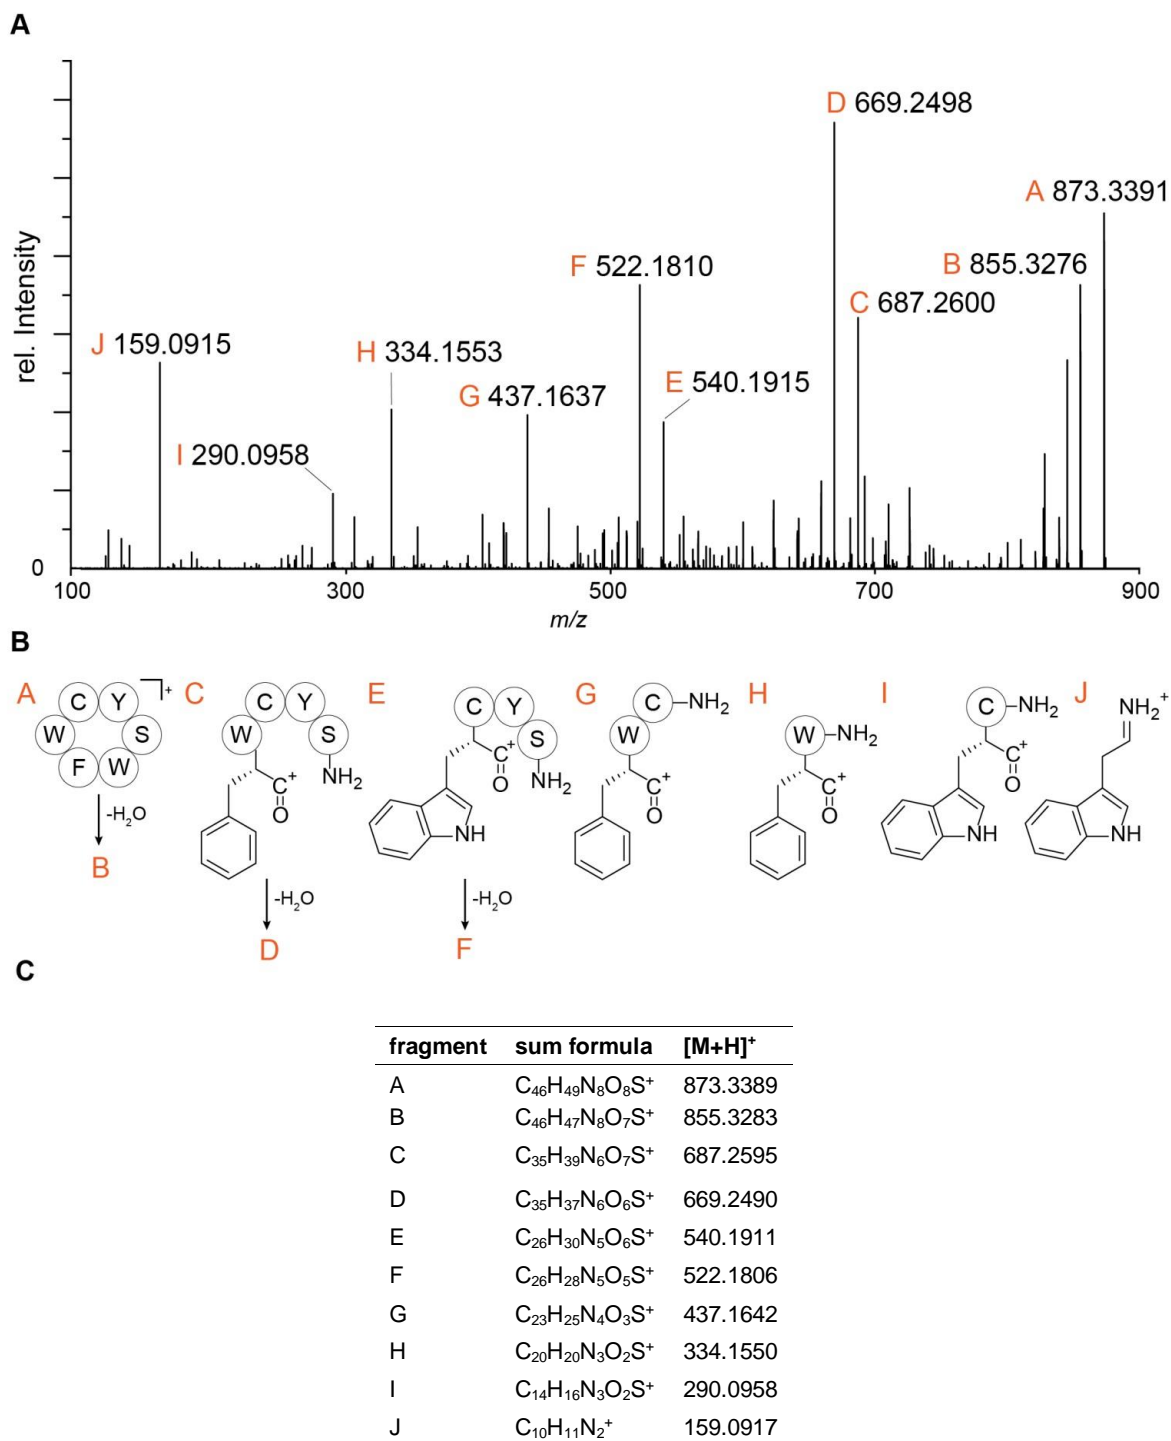



**Figure S5. Overview of synthetic strategies.** The synthetic strategies towards compounds **1–5** with precursors are depicted.

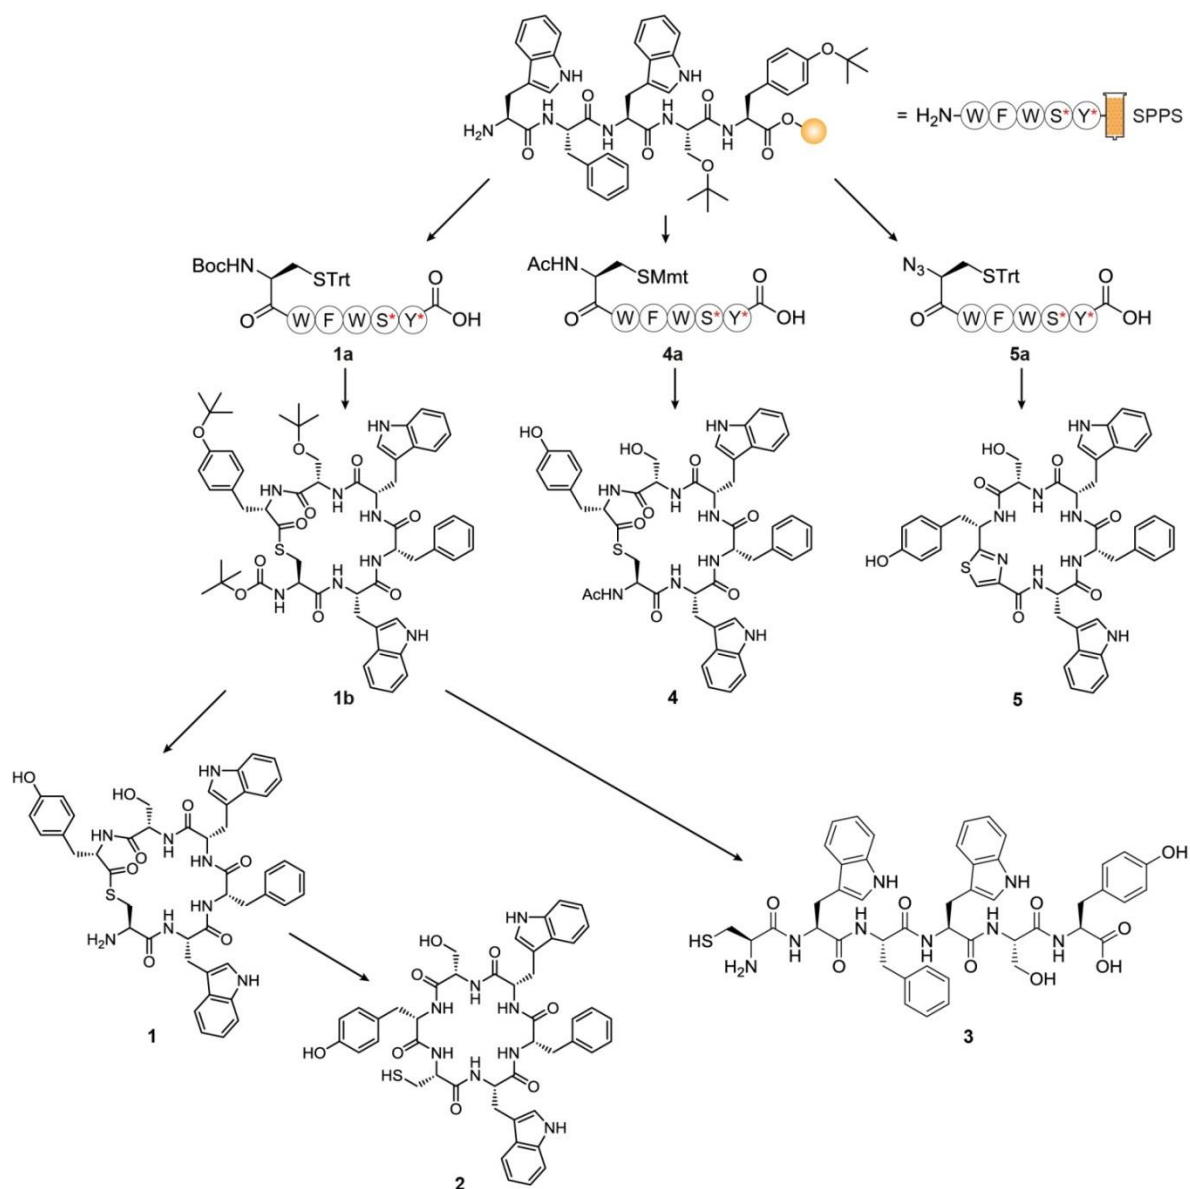

**Figure S6.**  $^{13}\text{C}$ -NMR spectrum of synthetic reference thiolactone **1**. Confirmation of the formation of the synthetic reference thiolactone **1** by  $^{13}\text{C}$ -NMR.

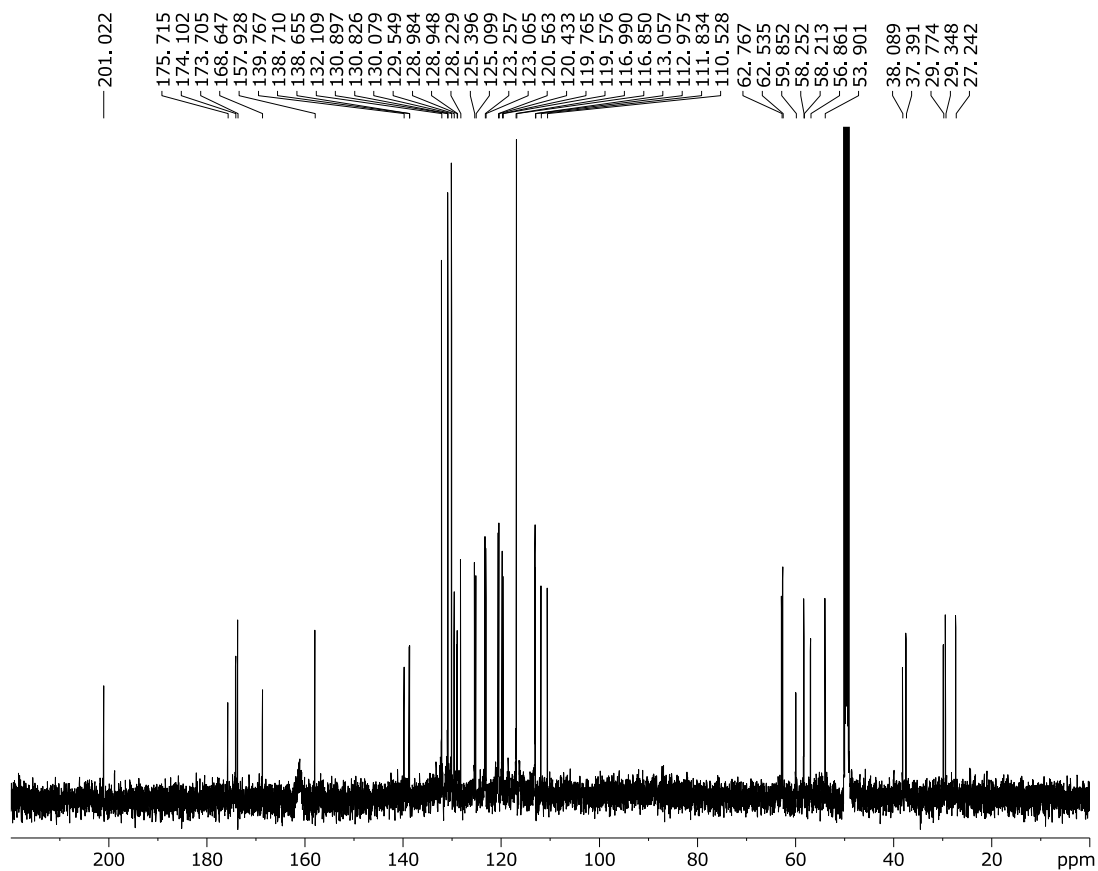

**Figure S7. Comparison by HPLC-HRMS of retention time and accurate mass of Rc-AIP1 with references.** Extracted ion chromatogram (EIC) and mass spectrum (HPLC-HRMS method A) showing the detection of the mass consistent with the prediction for mature Rc-AIP1 lacking an N-terminal extension (calc.  $m/z$  873.3389 [M+H]<sup>+</sup>; found  $m/z$  873.3398) [M+H]<sup>+</sup> in the metabolite profile of *R. cellulolyticum*. Upon comparison to the synthetic references thiolactone **1** and cyclopeptide **2**, the retention time of Rc-AIP1 aligned with that of **2**, proving that the AIP of *R. cellulolyticum* is a homodetic cyclopeptide (cAIP). The mass spectra shown for thiolactone **1** and cyclopeptide **2** originate from the major EIC signal in each case. SSPS, solid-phase peptide synthesis.

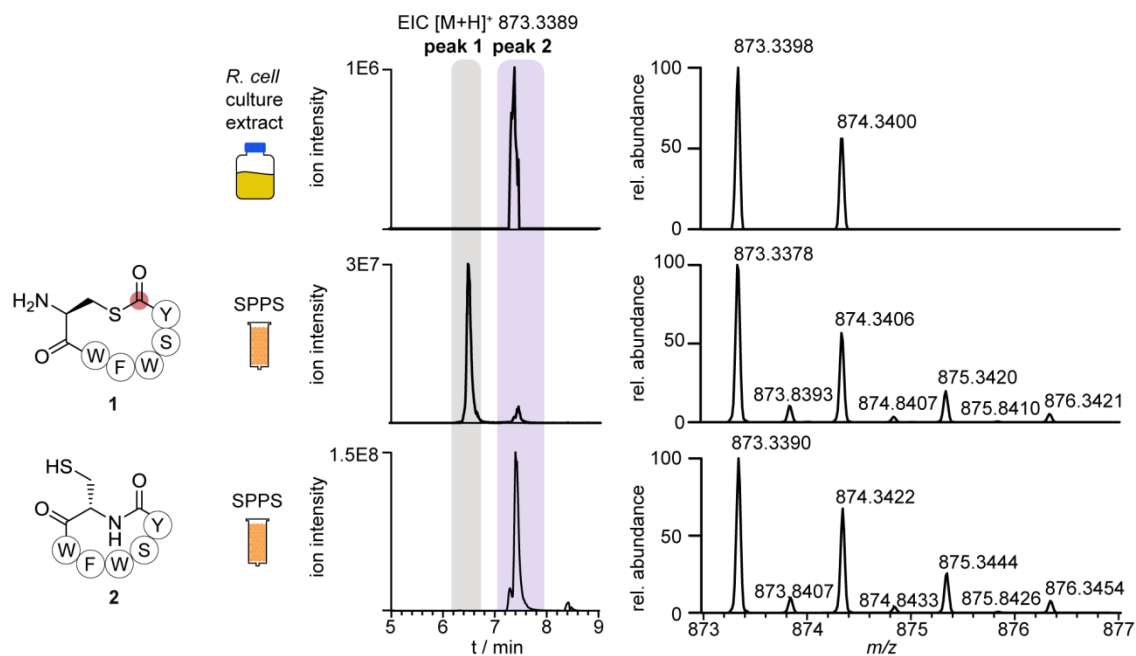

**Figure S8. HRMS<sup>2</sup> spectra of the synthetic thiolactone 1.** Comparison of HRMS<sup>2</sup> spectra (HPLC-HRMS method A) of the molecular ion masses ( $m/z$  873.3389  $[M+H]^+$ ) corresponding to peak 1 and peak 2 of the synthetic thiolactone 1 (see Figure 2B and Figure S7), with 15 and 22 normalized collision energy (NCE).

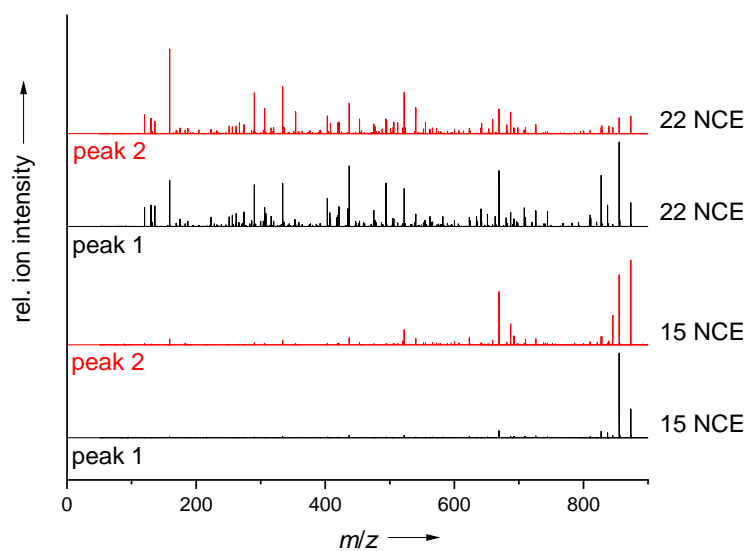

**Figure S9. Thiolactone 1 spontaneously converts into lactam 2.** Extracted ion chromatograms (EICs) (HPLC-HRMS method A) of  $m/z$  873.3389  $[M+H]^+$  (5 ppm window) shows the conversion of thiolactone 1 into lactam 2 over time (d, days).

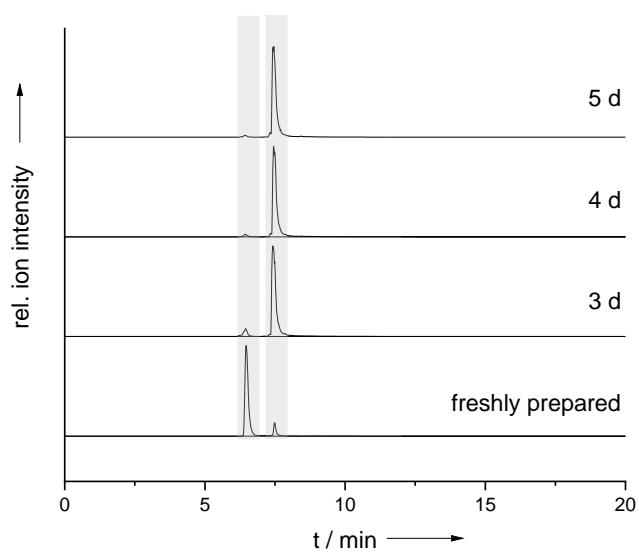

**Figure S10.**  $^{13}\text{C}$ -NMR spectrum of synthetic reference cyclopeptide **2**. Confirmation of the formation of the cyclopeptide **2** by  $^{13}\text{C}$ -NMR.

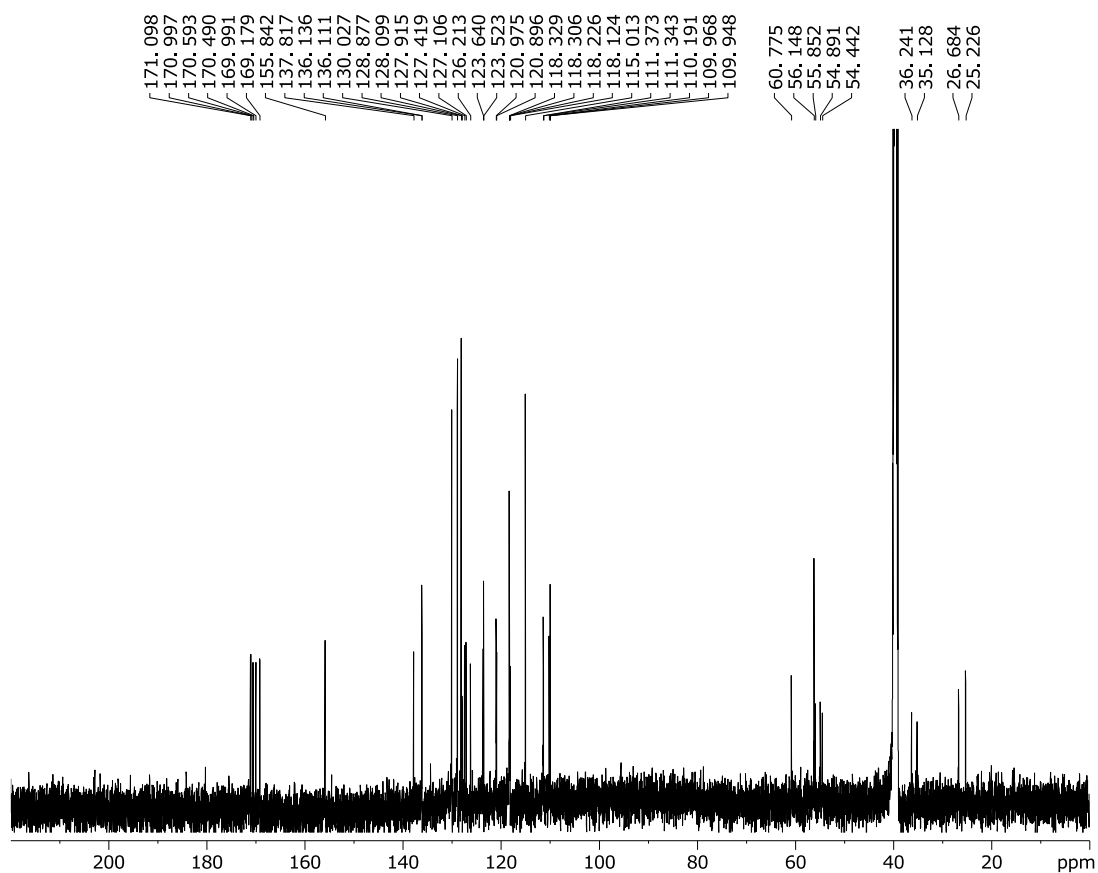

**Figure S11. Rearrangement kinetics of thiolactone 1 measured with Ellman's reagent.** The stability of **1** was measured by reaction of the spontaneously formed free thiol in **2** with Ellman's reagent. The normalized absorbance at 412 nm is shown over the time course of 2000 sec. As a non-linear regression, the data points were fitted with a one-phase-association equation. The time points at which half of the molecules (half-life,  $t_{1/2}$ ) had rearranged from thiolactone **1** to cyclopeptide **2**, *i. e.* free thiol, is shown in each case. A control experiment is shown in Figure S30.

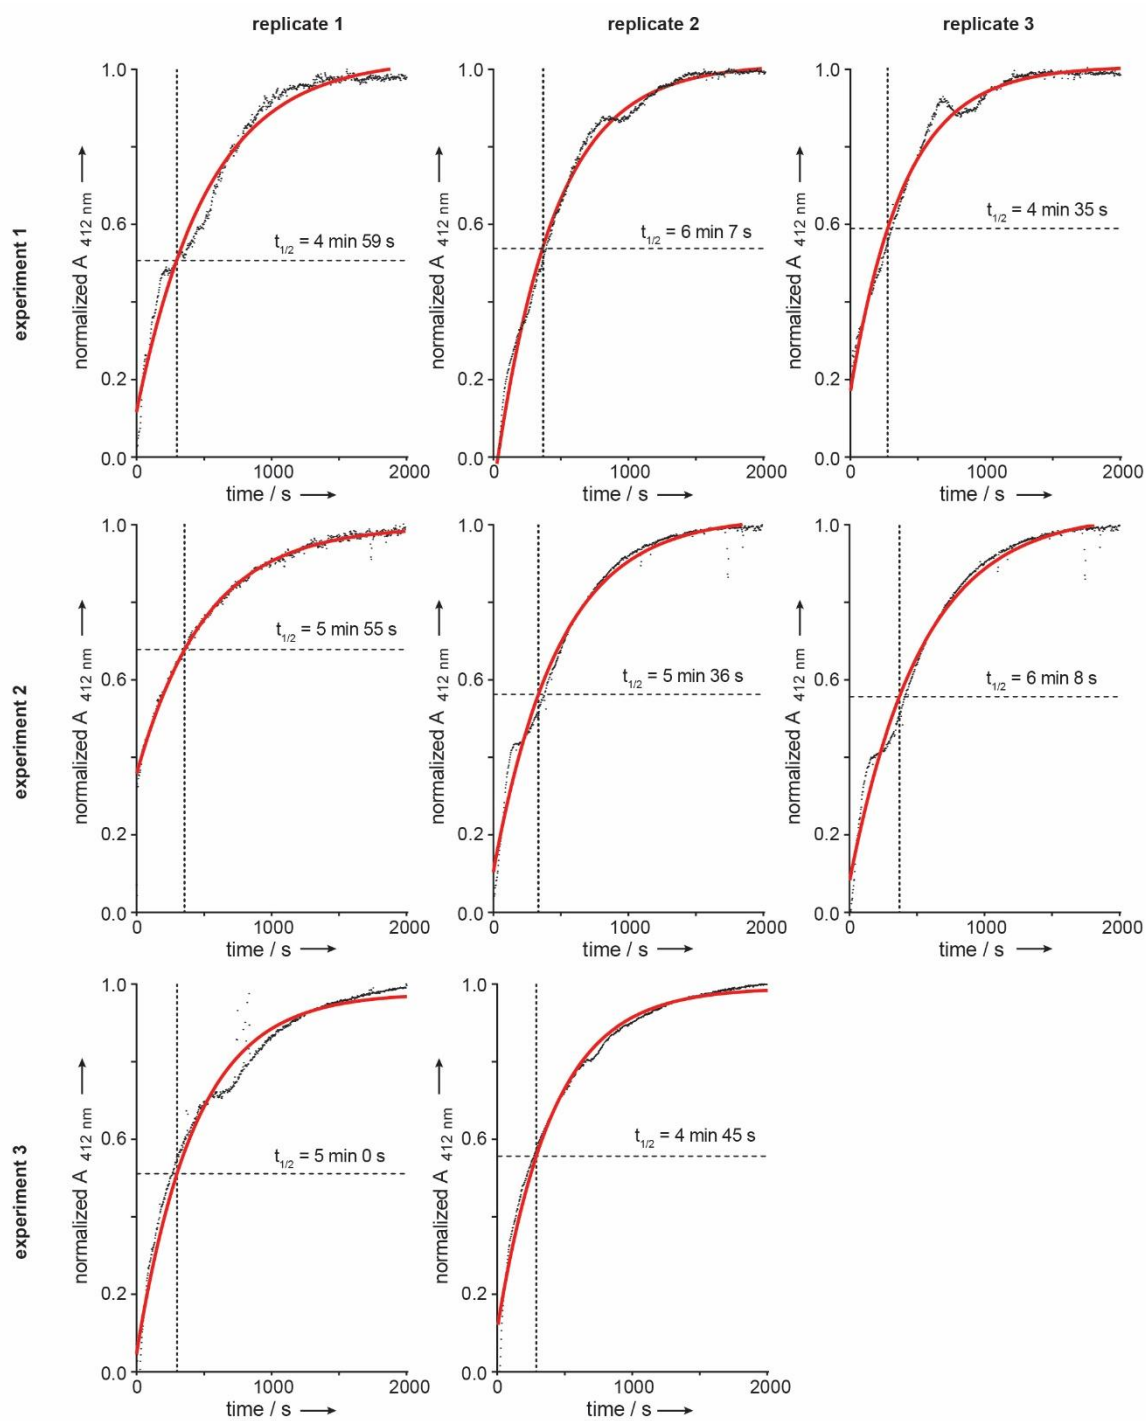

**Figure S12. Generation of *R. cellulolyticum*  $\Delta agrD1$  by CRISPR-nCas9 genome editing.** **A)** A portion of the Ccel\_2126 sequence is shown (*agrD1*) with the region of the targeted mutation displayed beneath ( $\Delta agrD1$ , colored red). The location of the stop codon is indicated by an asterisk. **B)** Agarose gel (1.5 %) showing *SpeI*-digested Ccel2126-specific PCR products amplified from single colonies of the indicated strains. The PCR amplicon from the wild-type (WT) control (1026 bp) does not contain a *SpeI* recognition site and is not digested by *SpeI*. The PCR amplicon (1026 bp) from the  $\Delta agrD1$  strain contains one *SpeI* recognition site and is digested to the expected 580 bp and 446 bp products by *SpeI*. L, GeneRuler DNA ladder Mix (Thermo Scientific). **C)** DNA sequence chromatogram verifying the precise insertion of the mutated sequence (highlighted) in *R. cellulolyticum*  $\Delta agrD1$ .

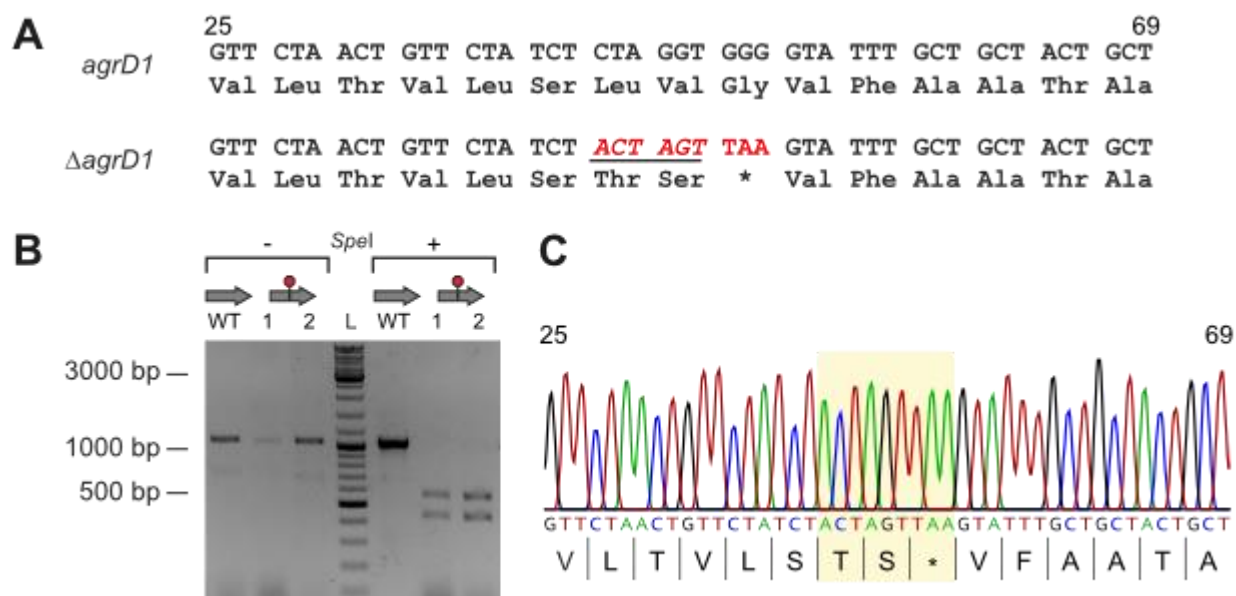



**Figure S13. Bioinformatic screen for AIP biosynthetic gene clusters in diverse Clostridia.** **A)** Maximum-likelihood phylogenetic tree of 16s rRNA sequences from the diverse Clostridia subjected to the bioinformatic screen with 1000 bootstrap replicates. *Staphylococcus aureus* was selected as the outgroup. The number in parenthesis indicates the numbers of AIP biosynthetic loci identified in each genome (see Table S1 for additional information). Extracts from the strains colored red were analyzed by HPLC-HRMS, resulting in the detection of several candidate AIPs, which were ultimately shown to be cAIPs. **B)** WebLogo of all AgrD precursor peptides identified in this bioinformatic screen. Despite their divergence, the presence in the predicted core peptide (underlined) of a cyclizable residue (red asterisk) 10–11 residues upstream of the conserved proline in the follower peptide is universally conserved.

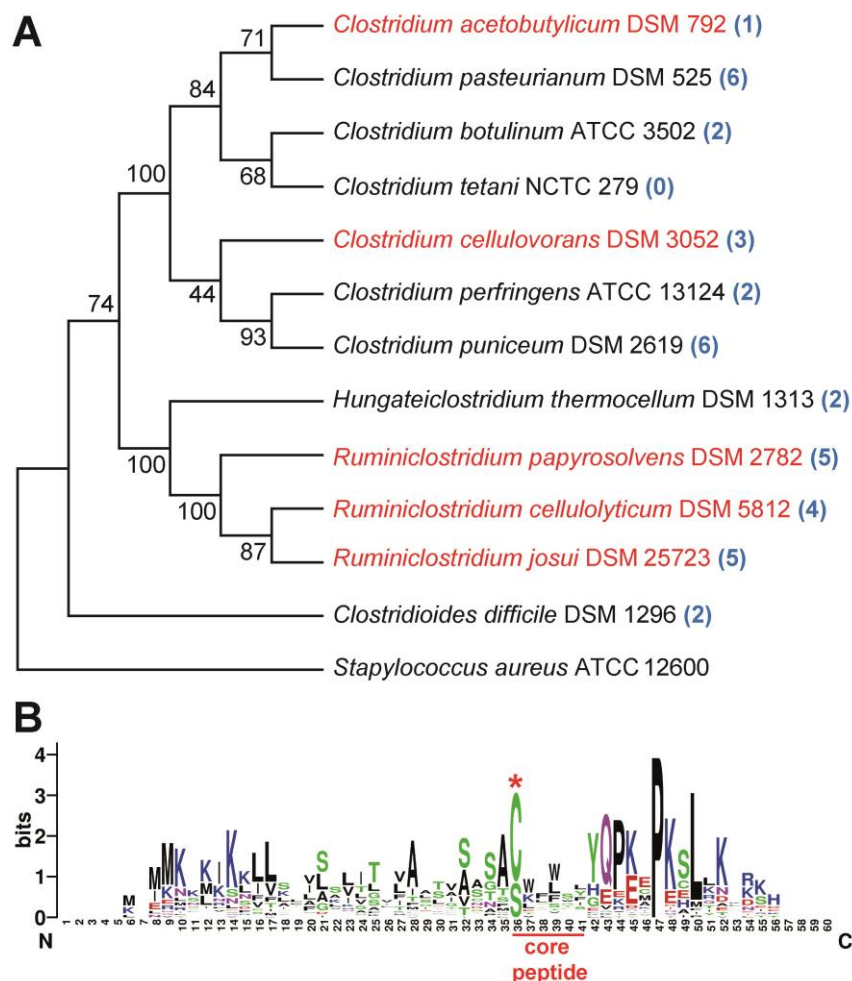

**Figure S14. Three *Ruminiclostridium* species produce AIPs with identical fragmentation pattern.** Comparison of HRMS<sup>2</sup> spectra (HPLC-HRMS method A) of the molecular ion masses ( $m/z$  873.3389 [M+H]<sup>+</sup>) corresponding to compounds eluting at around 7.4 min from the crude extracts of *R. cellulolyticum* (22 NCE), *R. josui* (18 NCE), *R. papyrosolvans* (18 NCE), and the synthetic reference cyclopeptide **2** (18 and 22 NCE).

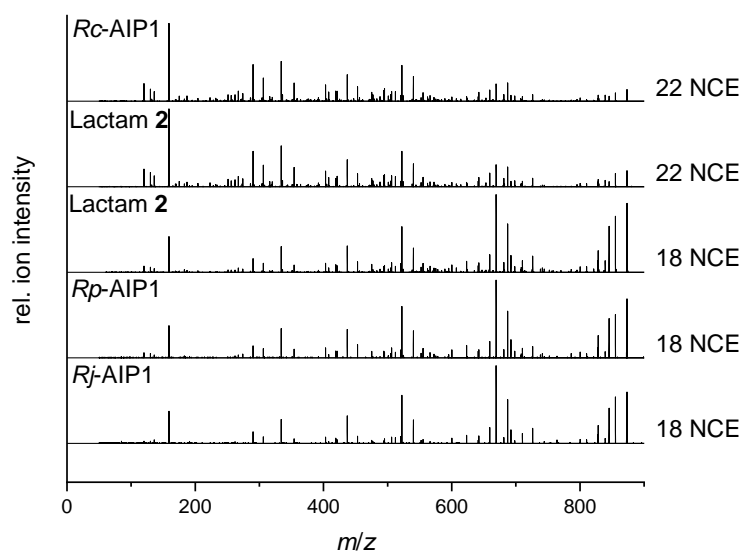

**Figure S15. HRMS<sup>2</sup>-based fragmentation of Ca-AIP1 from *C. acetobutylicum*.** **A)** Representative fragmentation pattern (HPLC-HRMS method A) of Ca-AIP1 detected in a crude extract from *C. acetobutylicum*. All observed fragment masses were in agreement with a cyclopeptide of amino acid sequence CVLVTL (see Panel B and C). **B)** Shown are possible ions. **C)** Listed are exact masses and respective sum formulas.

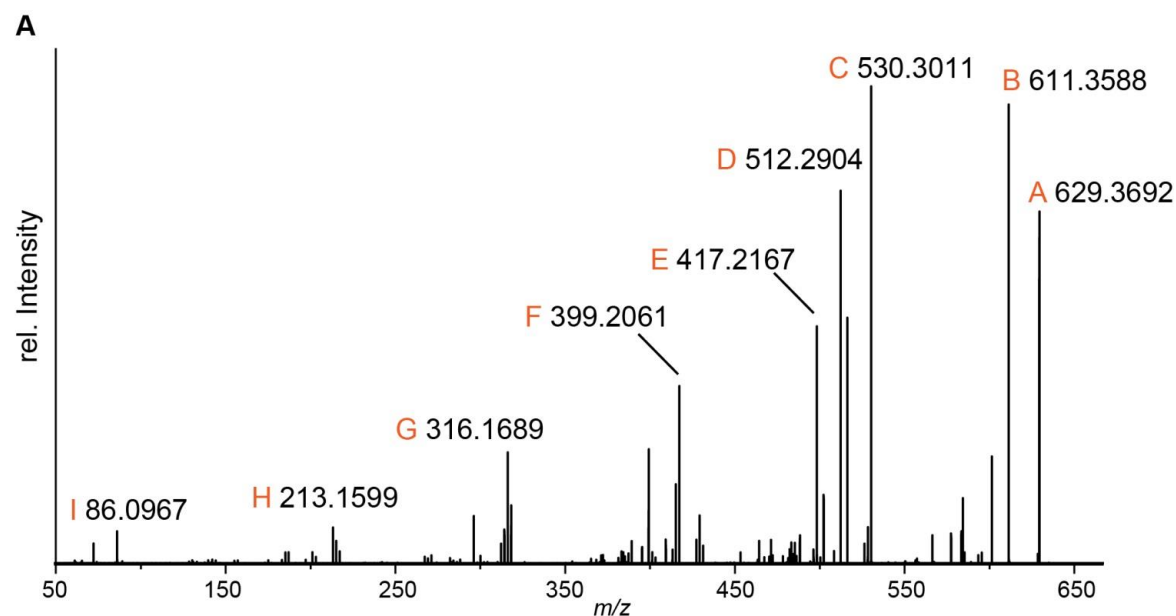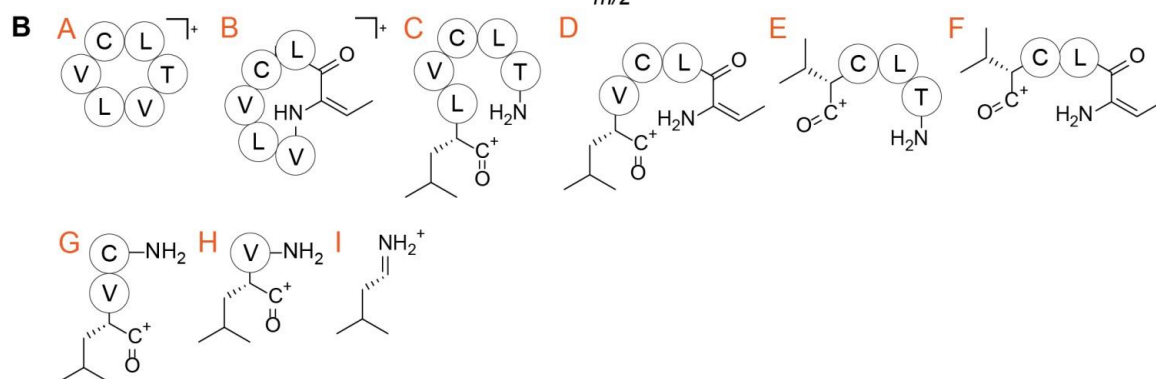

**C**

| fragment | sum formula             | $[M+H]^+$ |
|----------|-------------------------|-----------|
| A        | $C_{29}H_{53}N_6O_7S^+$ | 629.3691  |
| B        | $C_{29}H_{51}N_6O_6S^+$ | 611.3585  |
| C        | $C_{24}H_{44}N_5O_6S^+$ | 530.3007  |
| D        | $C_{24}H_{42}N_5O_5S^+$ | 512.2901  |
| E        | $C_{18}H_{33}N_4O_5S^+$ | 417.2166  |
| F        | $C_{18}H_{31}N_4O_4S^+$ | 399.2061  |
| G        | $C_{14}H_{26}N_3O_3S^+$ | 316.1689  |
| H        | $C_{11}H_{21}N_2O_2^+$  | 213.1598  |
| I        | $C_5H_{12}N^+$          | 86.0864   |

**Figure S16. HRMS<sup>2</sup>-based fragmentation of Cc-AIP1 from *C. cellulovorans*.** **A)** Representative fragmentation pattern (HPLC-HRMS method A) of Cc-AIP1 detected in a crude extract from *C. cellulovorans*. All observed fragment masses were in agreement with a cyclopeptide of amino acid sequence CVTAL (see Panel B and C). **B)** Shown are possible ions. **C)** Listed are exact masses and respective sum formulas.

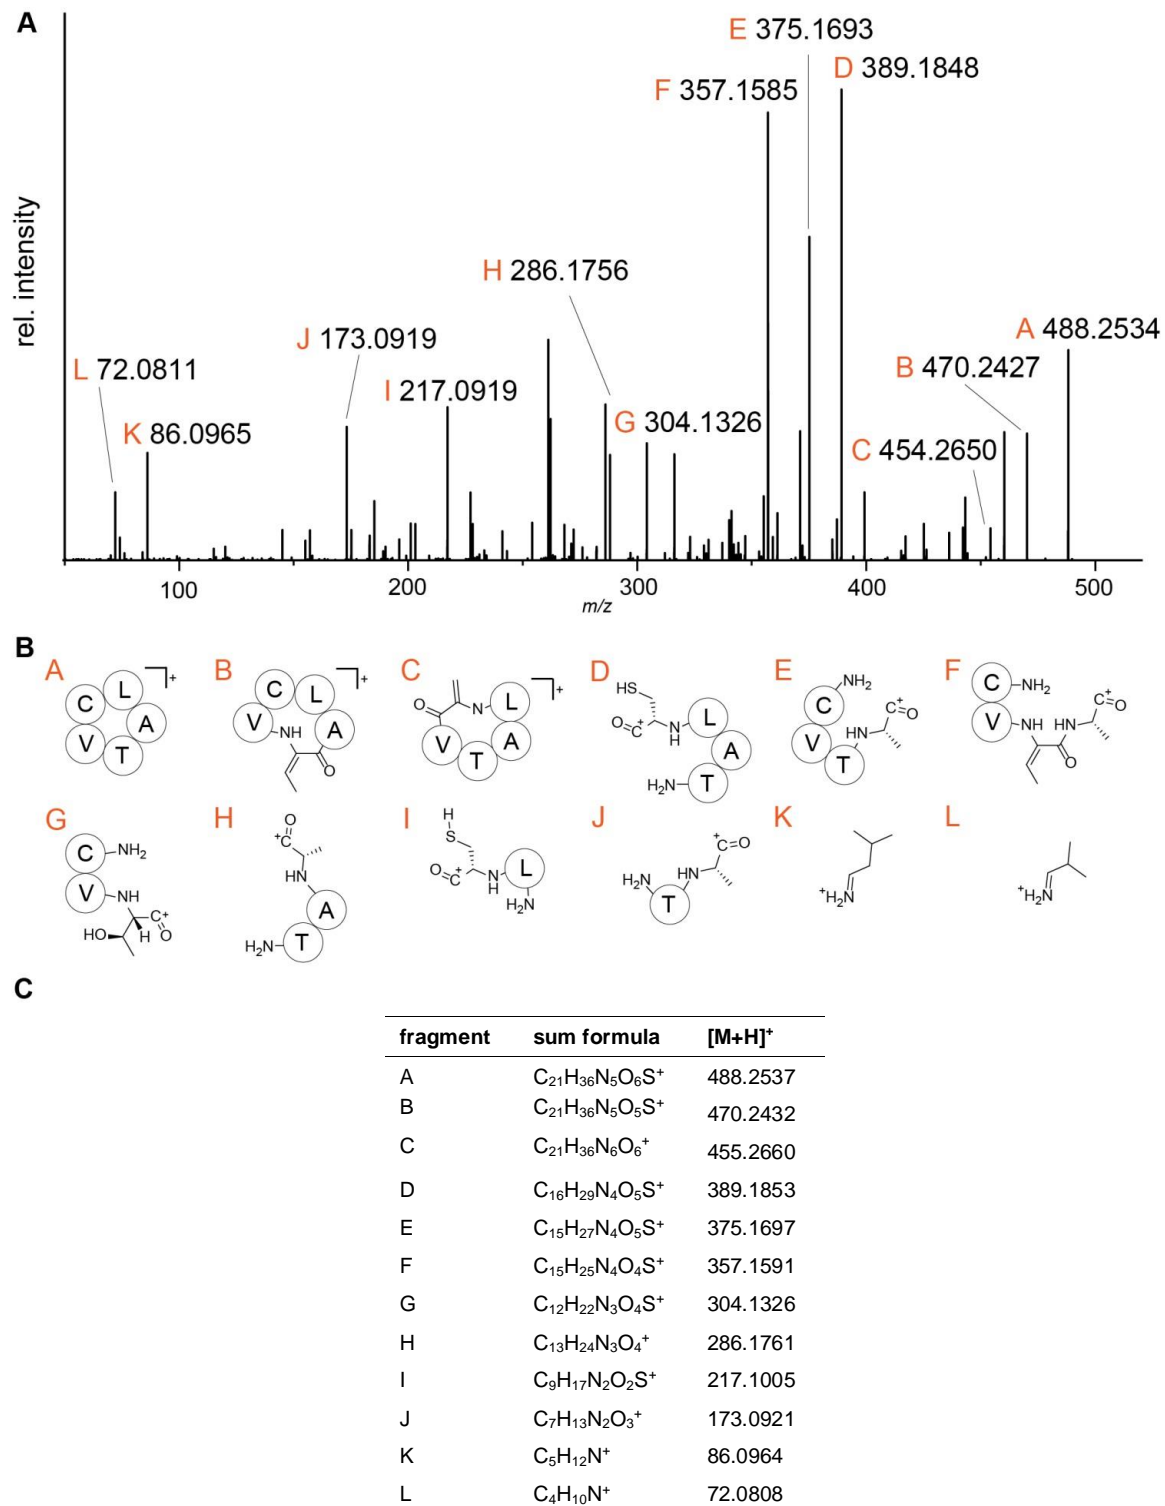

**Figure S17. HRMS<sup>2</sup>-based fragmentation of Rp-AIP2 from *R. papyrosolvens*.** **A)** Representative fragmentation pattern (HPLC-HRMS method A) of Rp-AIP2 detected in a crude extract from *R. papyrosolvens*. All observed fragment masses were in agreement with a cyclopeptide of amino acid sequence CFLWG (see Panel B and C). **B)** Shown are possible ions. **C)** Listed are exact masses and respective sum formulas.

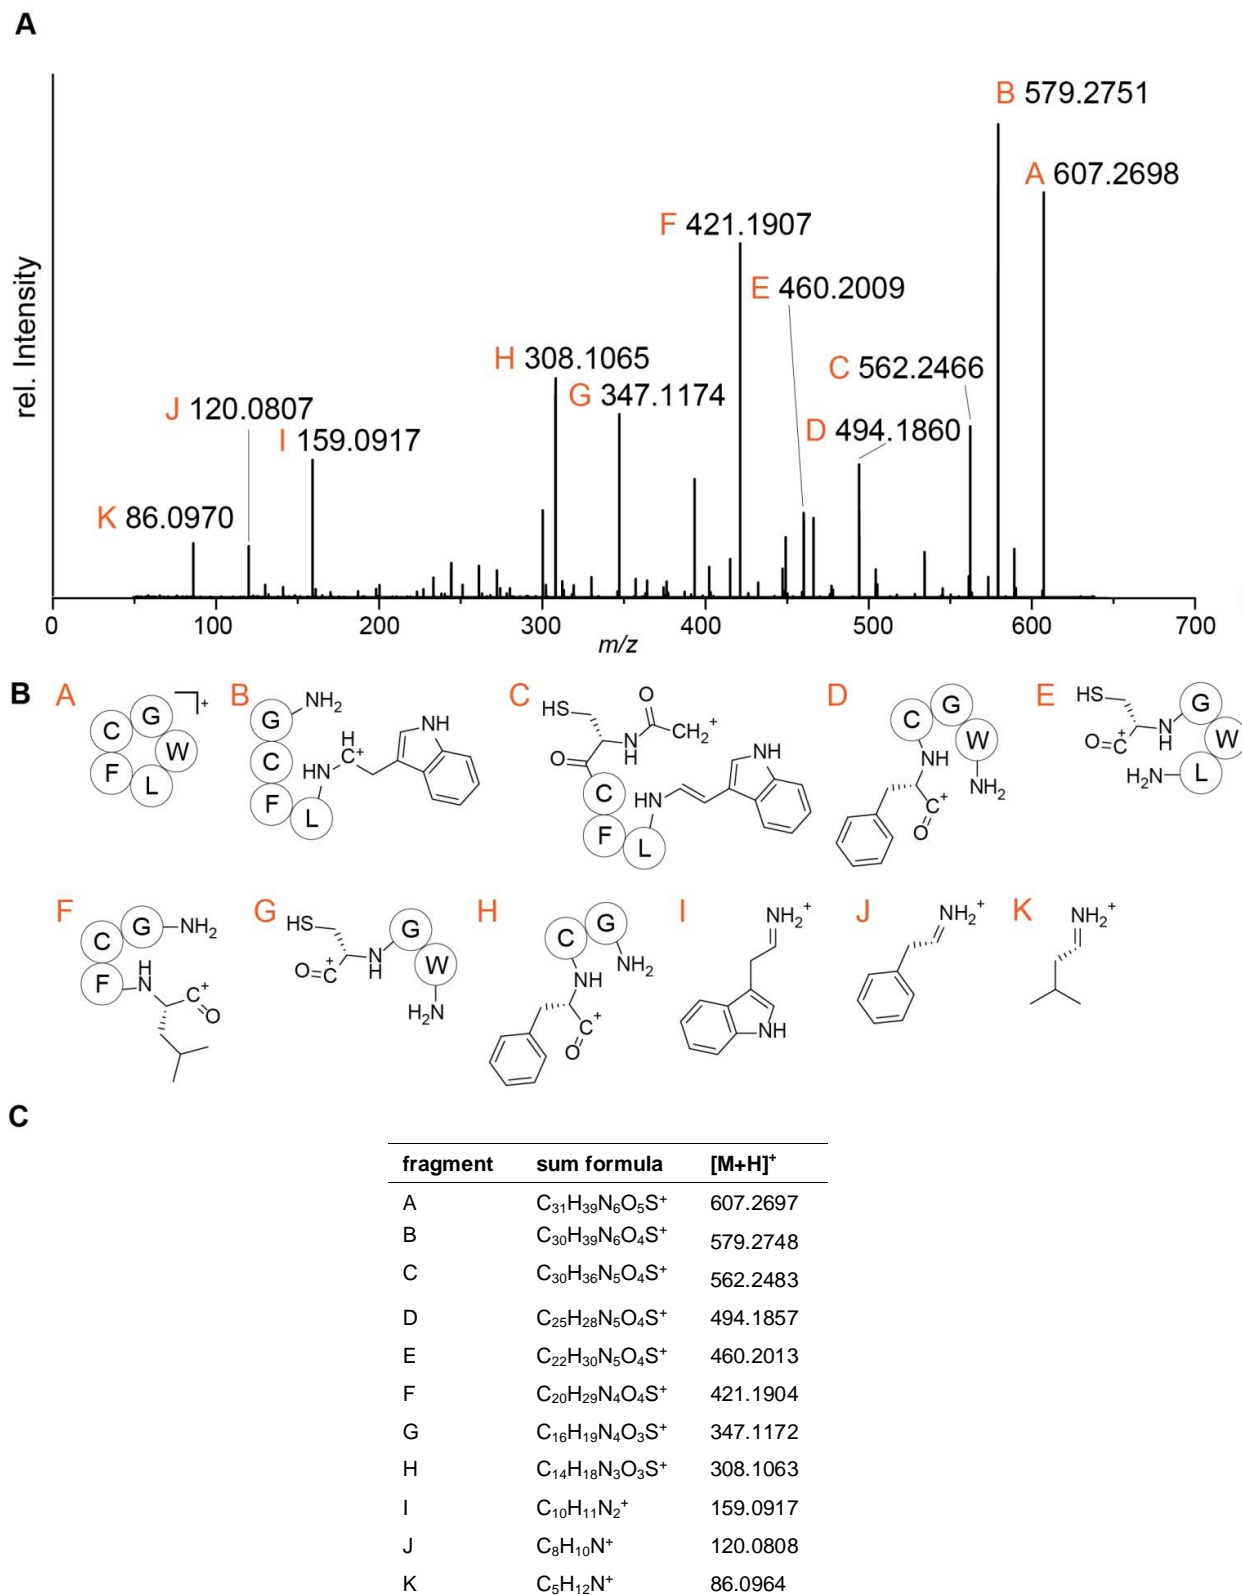

**Figure S18. HRMS<sup>2</sup>-based fragmentation of *Rj*-AIP2 from *R. josui*.** **A)** Representative fragmentation pattern (HPLC-HRMS method A) of *Rj*-AIP2 detected in a crude extract from *R. josui*. All observed fragment masses were in agreement with a cyclopeptide of amino acid sequence CWMF<sub>2</sub>FS (see Panel B and C). **B)** Shown are possible ions. **C)** Listed are exact masses and respective sum formulas.

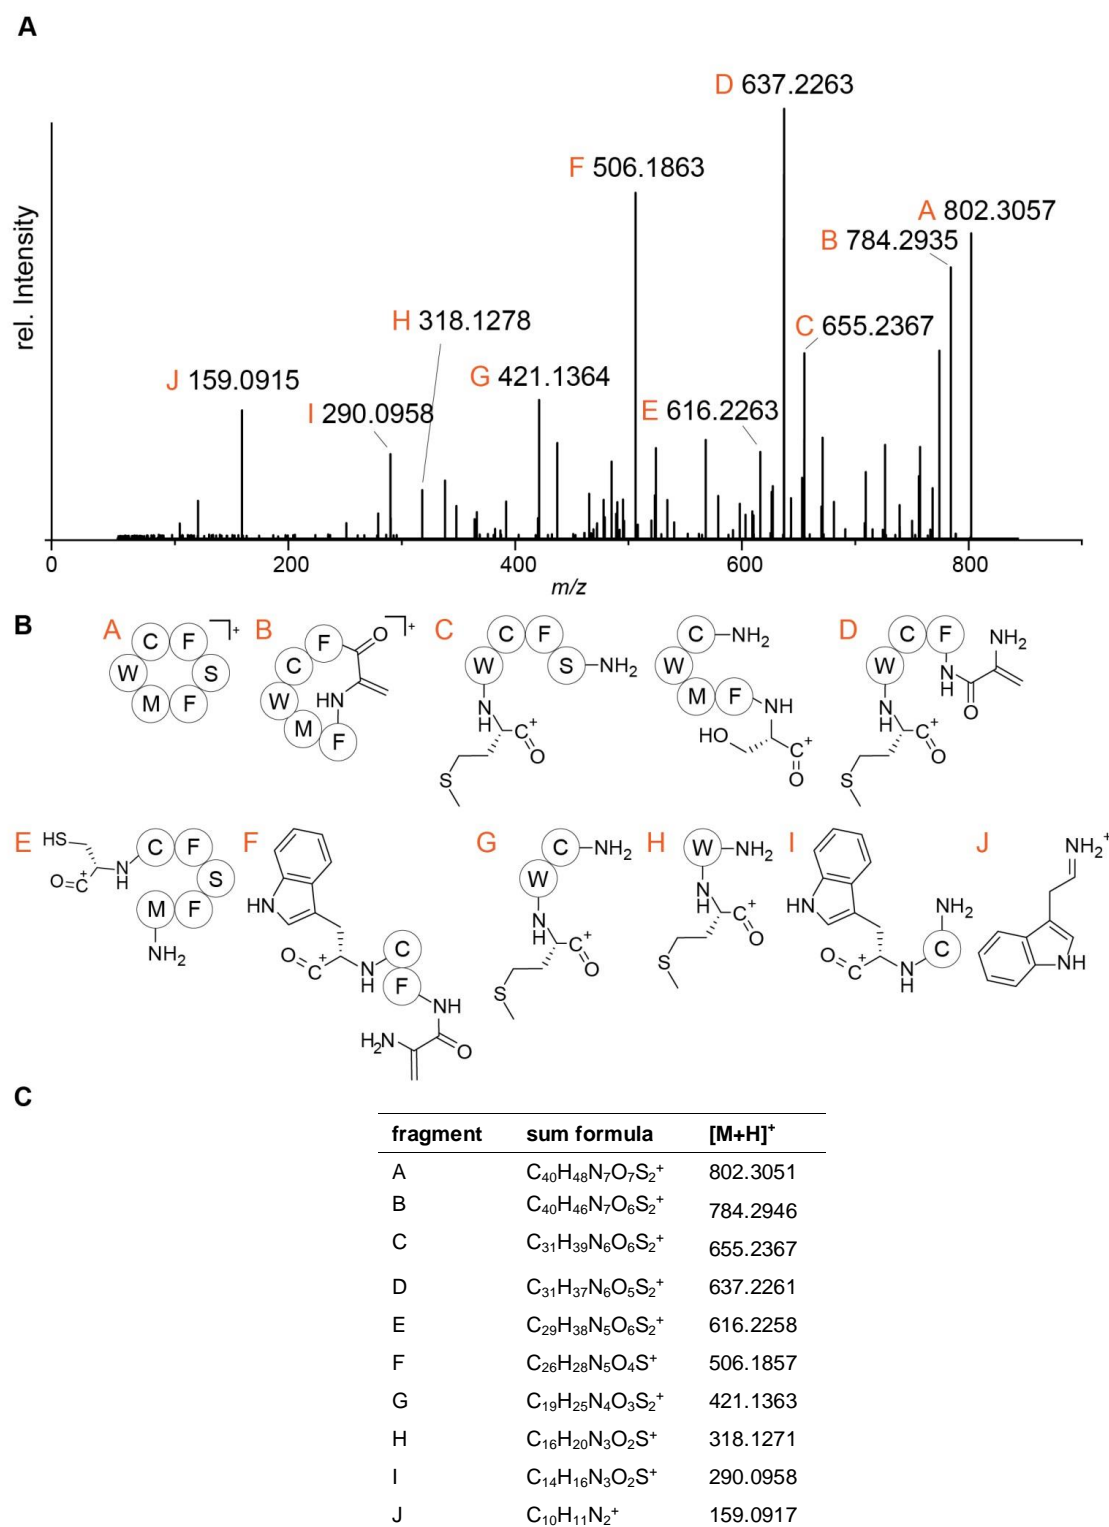

**Figure S19. Overview of method to distinguish thiolactone or cyclopeptide form of AIPs.** General scheme depicting the reaction of a cAIP (homodetic peptide) with *N*-benzylmaleimide resulting in the formation of a thiol adduct (mass increase of 187.0633 Da, red) and the absence of hydrolysis by NaOH (blue). In contrast, an AIP would not react with *N*-benzylmaleimide but the presence of a thiolactone moiety would render it susceptible to basic hydrolysis (mass increase of 18.0106 Da, blue).

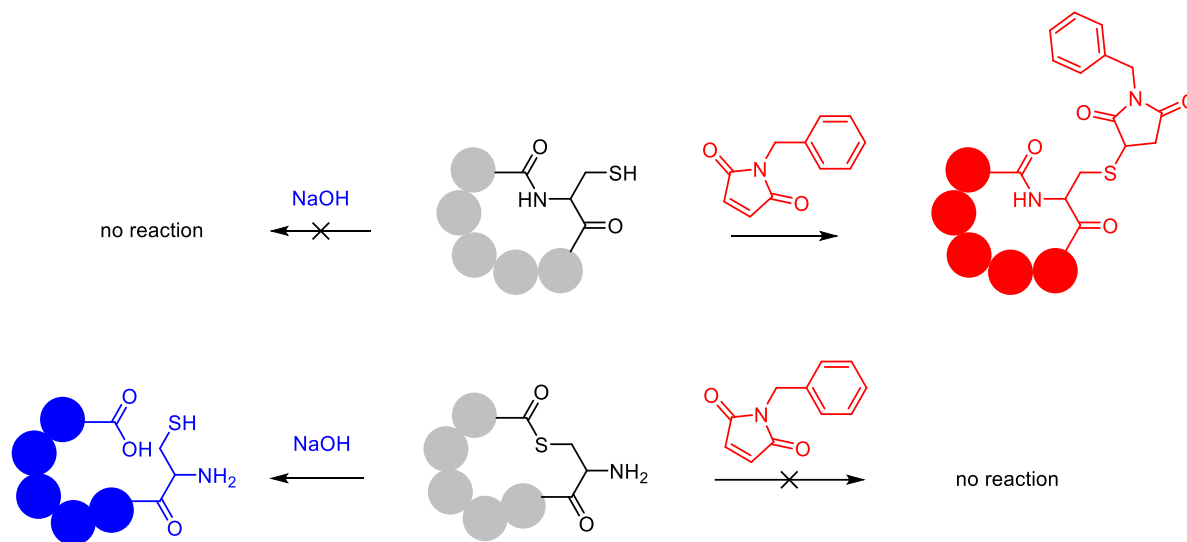

**Figure S20. Thiolactone susceptibility to NaOH hydrolysis.** Reaction scheme (above) and HPLC-HRMS chromatograms (below) (HPLC-HRMS method C) depicting the sensitivity of the protected thiolactone **1b** to NaOH treatment. 1 M NaOH (v:v = 1:1) was added to a solution of **1b** in MeOH at 20 °C. The extracted ion chromatograms of the mass corresponding to the fully protected thiolactone **1b** ( $m/z$  1,085.5165 [M+H]<sup>+</sup>) and the mass of the linear form (mass increase of 18.0106 Da,  $m/z$  1,103.5271 [M+H]<sup>+</sup>) are shown over a period of 16 hours. Due to the instability of thiolactone **1**, **1b** was used for method validation. These data show a rapid ring-opening occurred.

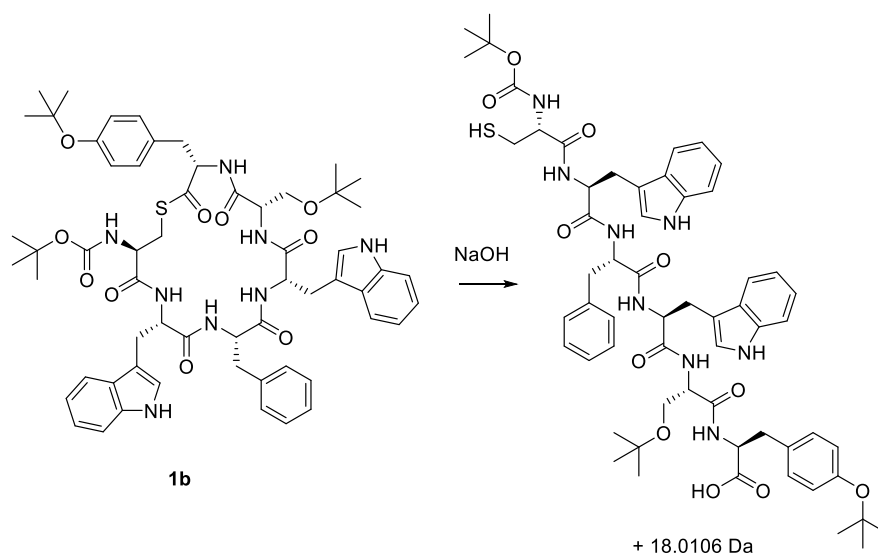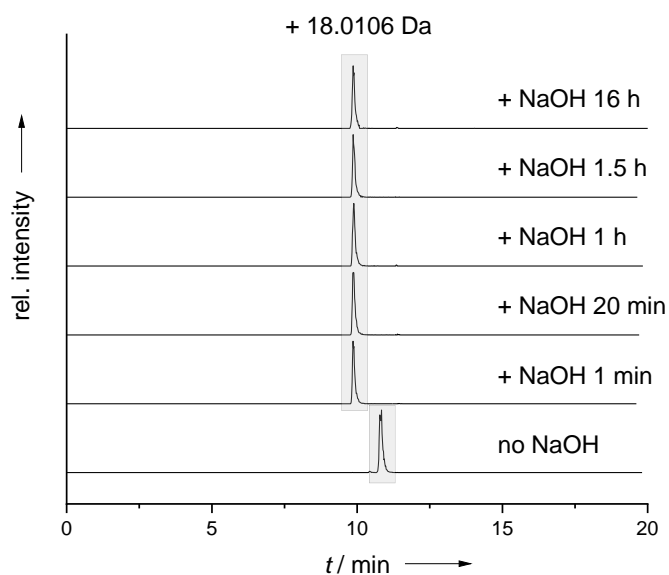



**Figure S21. Lactam resistance to NaOH hydrolysis.** Reaction scheme (above) and HPLC-HRMS chromatograms (below) (HPLC-HRMS method C) depicting the stability of lactam **2** to NaOH treatment. 1 M NaOH (v:v= 1:1) was added to a solution of **2** in MeOH at 20 °C. The extracted ion chromatograms of the mass corresponding to the lactam **2** ( $m/z$  873.3389 [M+H]<sup>+</sup>) and the mass of the linear form (mass increase of 18.0106 Da,  $m/z$  891.3494 [M+H]<sup>+</sup>) are shown over a period of 15 h. The HPLC-HRMS chromatogram of the linear peptide **3** is shown for reference. At 15 h, a trace amount of hydrolysis was detected; HRMS<sup>2</sup> measurements of the linear form showed that the cleavage occurred randomly at different amide bonds. No ring-opening was observed at the chosen reaction time of 1 h for NaOH treatment of crude extracts.

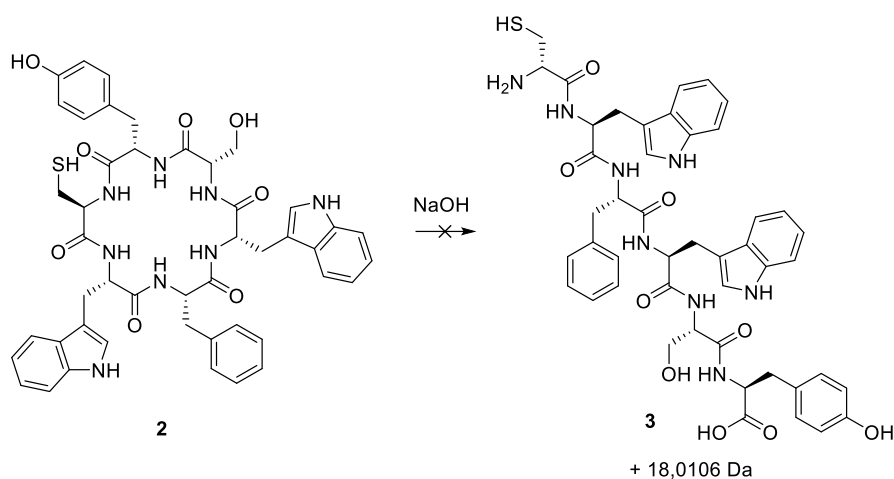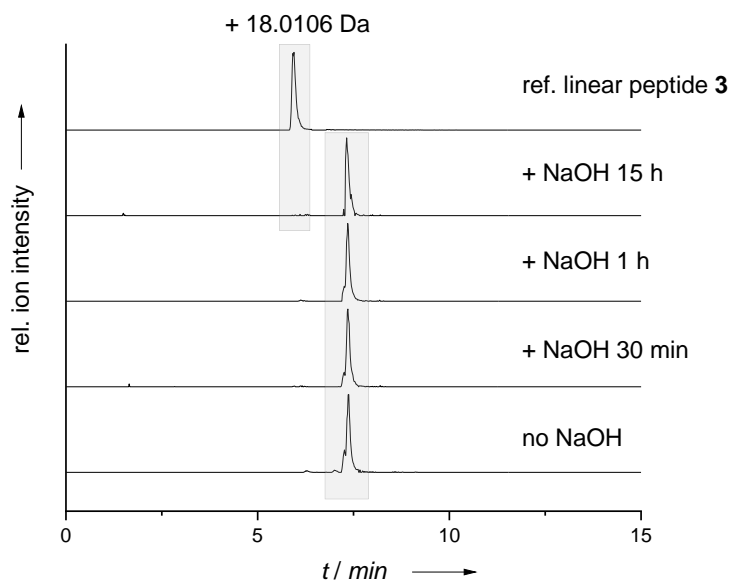

**Figure S22. Chemoselective labeling of free thiols by *N*-benzylmaleimide.** Reaction scheme (above) and HPLC-HRMS chromatograms (below) (HPLC-HRMS method C) depicting the reaction of the linear peptide **3** with *N*-benzylmaleimide. A solution of *N*-benzylmaleimide (10 mg in 100  $\mu$ L MeCN, 1  $\mu$ L) was added to a solution of the linear peptide **3** in MeOH (*v:v* = 1:1) at 20  $^{\circ}$ C. The extracted ion chromatograms of the mass corresponding to **3** ( $m/z$  891.3494  $[M+H]^+$ ), the mass of **3** labeled once with *N*-benzylmaleimide (mass increase of 187.0633 Da,  $m/z$  1,078.4128  $[M+H]^+$ ), and the mass of **3** labeled twice with *N*-benzylmaleimide (mass increase of 374.1266 Da,  $m/z$  1,265.4761  $[M+H]^+$ ) are shown over a period of 18 hours. Due to the instability of thiolactone **1**, **3** was used for method validation to test whether off-target reaction with the amine occurs. After 1 h, most of **3** ( $m/z$  891.3494) had reacted with *N*-benzylmaleimide to form the once-labeled adduct. Only after prolonged reaction times was the mass of twice-labeled **3** detected.

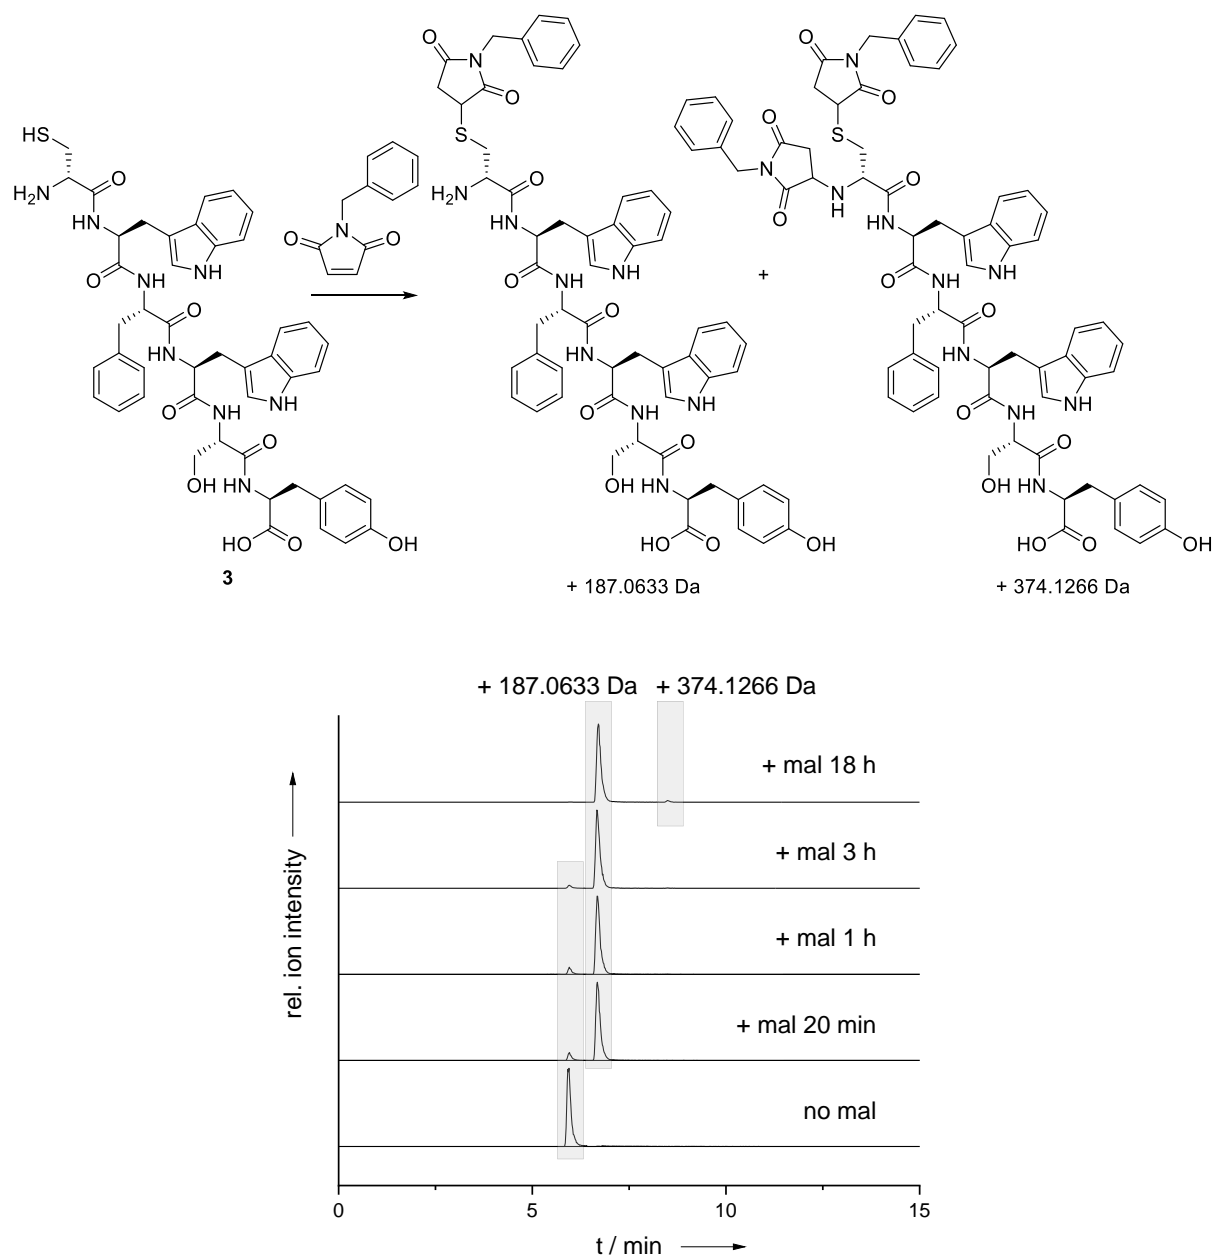

**Figure S23. Retention time of controls for method to distinguish thiolactone or cyclopeptide form of AIPs.** Extracted ion chromatograms (EICs) (HPLC-HRMS method A) of synthetic standards with increasing retention time:  $m/z$  891.3494  $[M+H]^+$  corresponding to linear peptide **3** at 5.93 min (blue);  $m/z$  873.3389  $[M+H]^+$  corresponding to thiolactone **1** at 6.47 min, with traces of the cyclopeptide **2** (green);  $m/z$  873.3389  $[M+H]^+$  corresponding to cyclopeptide **2** at 7.49 min (black);  $m/z$  1,060.4022  $[M+H]^+$  corresponding to *N*-benzylmaleimide adduct of cyclopeptide **2** at 8.27 min (red).

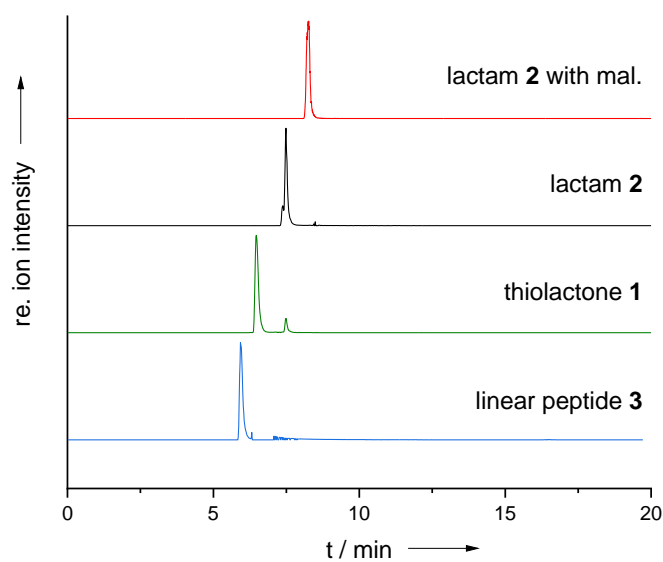

**Figure S24. Demonstration of expected cAIP behavior of Rc-AIP1 in crude extract.** Extracted ion chromatograms (EICs) (HPLC-HRMS method D) showing the detection of masses (1.5 ppm window) in a *R. cellulolyticum*  $\Delta agrD1$  pCPthl-*agrD1* crude extract consistent with the unreacted cAIP ( $m/z$  873.3389  $[M+H]^+$ , black), the expected mal-adduct ( $m/z$  1060.4022  $[M+H]^+$ , red) after *N*-benzylmaleimide treatment (+ mal.), and no ring opening ( $m/z$  891.3494  $[M+H]^+$ , blue) after NaOH treatment (+ NaOH). Reference compounds are shown for comparison.

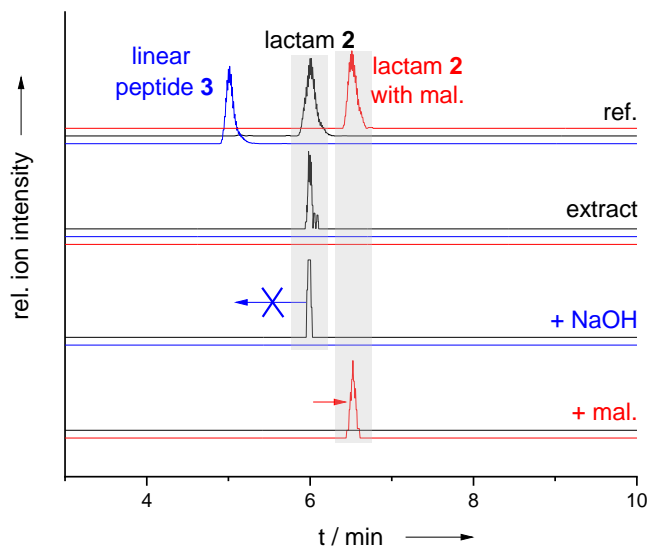

**Figure S25. Fragmentation pattern of maleimide adducts of *Rc*-AIP1, *Rp*-AIP1, *Rj*-AIP1 and cyclopeptide 2.** A) Representative fragmentation pattern (HPLC-HRMS method A) is shown for maleimide-labeled *Rc*-AIP1, *Rp*-AIP1, *Rj*-AIP1 from crude extracts of *R. cellulolyticum*, *R. papyrosolvens* and *R. josui*, respectively, as well as maleimide-labeled synthetic reference cyclopeptide 2. B) Shown are possible ions. C) Listed are exact masses and respective sum formulas.

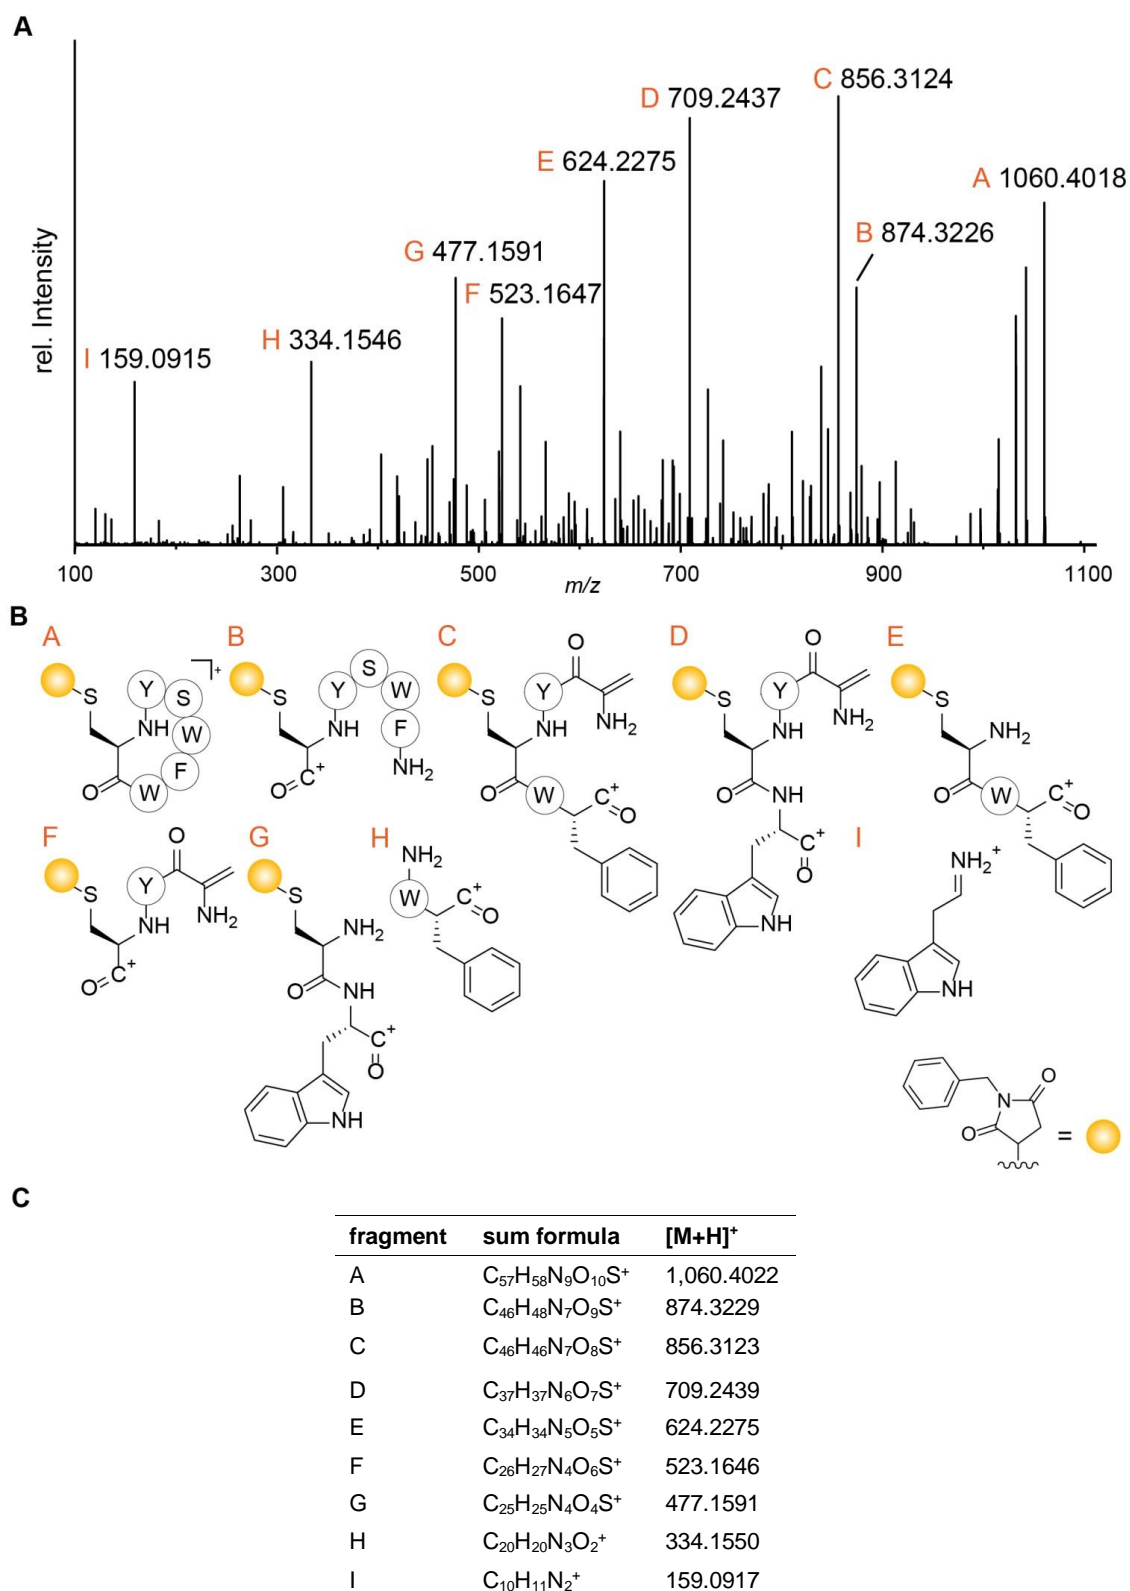

**Figure S26. Fragmentation pattern of the maleimide adduct of Ca-AIP1 from *C. acetobutylicum*.** A) Representative fragmentation pattern (HPLC-HRMS method A) is shown for maleimide-labeled Ca-AIP1 detected from a crude extract of *C. acetobutylicum*. B) Shown are possible ions. C) Listed are exact masses and respective sum formulas.

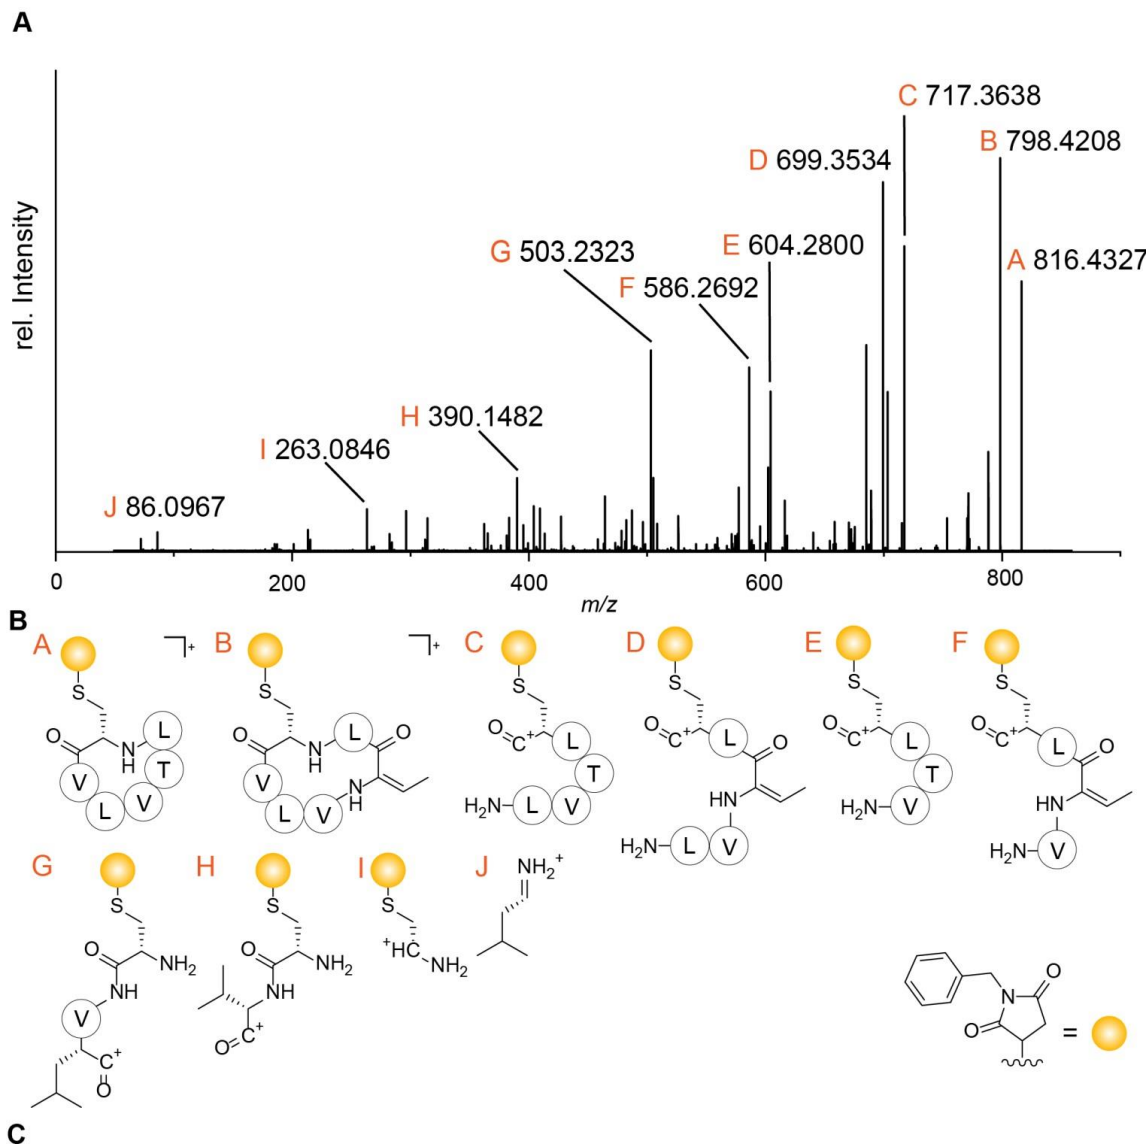

**Figure S27. Fragmentation pattern of the maleimide adduct of *Rp*-AIP2 from *R. papyrosolvans*.** A) Representative fragmentation pattern (HPLC-HRMS method A) is shown for maleimide-labeled *Rp*-AIP2 detected from a crude extract of *R. papyrosolvans*. B) Shown are possible ions. C) Listed are exact masses and respective sum formulas.

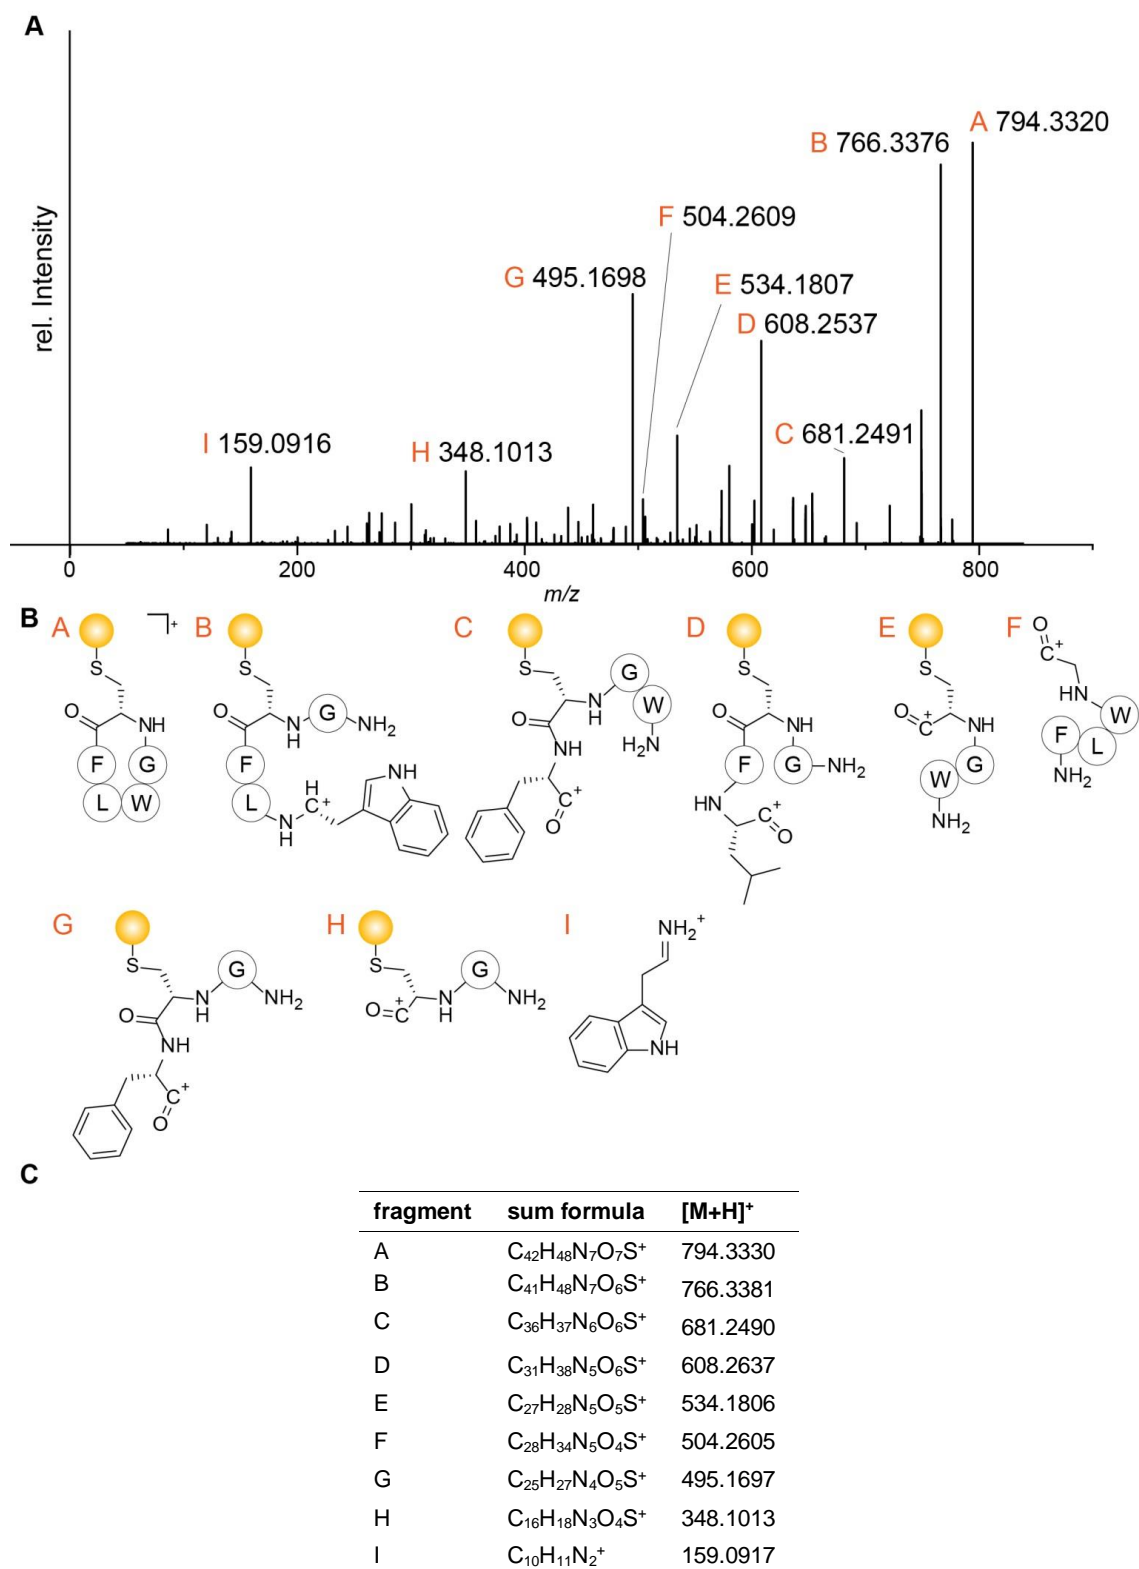

**Figure S28. Fragmentation pattern of the maleimide adduct of *Rj*-AIP2 from *R. josui*.** **A)** Representative fragmentation pattern (HPLC-HRMS method A) is shown for maleimide-labeled *Rj*-AIP2 detected from a crude extract of *R. josui*. **B)** Shown are possible ions. **C)** Listed are exact masses and respective sum formulas.

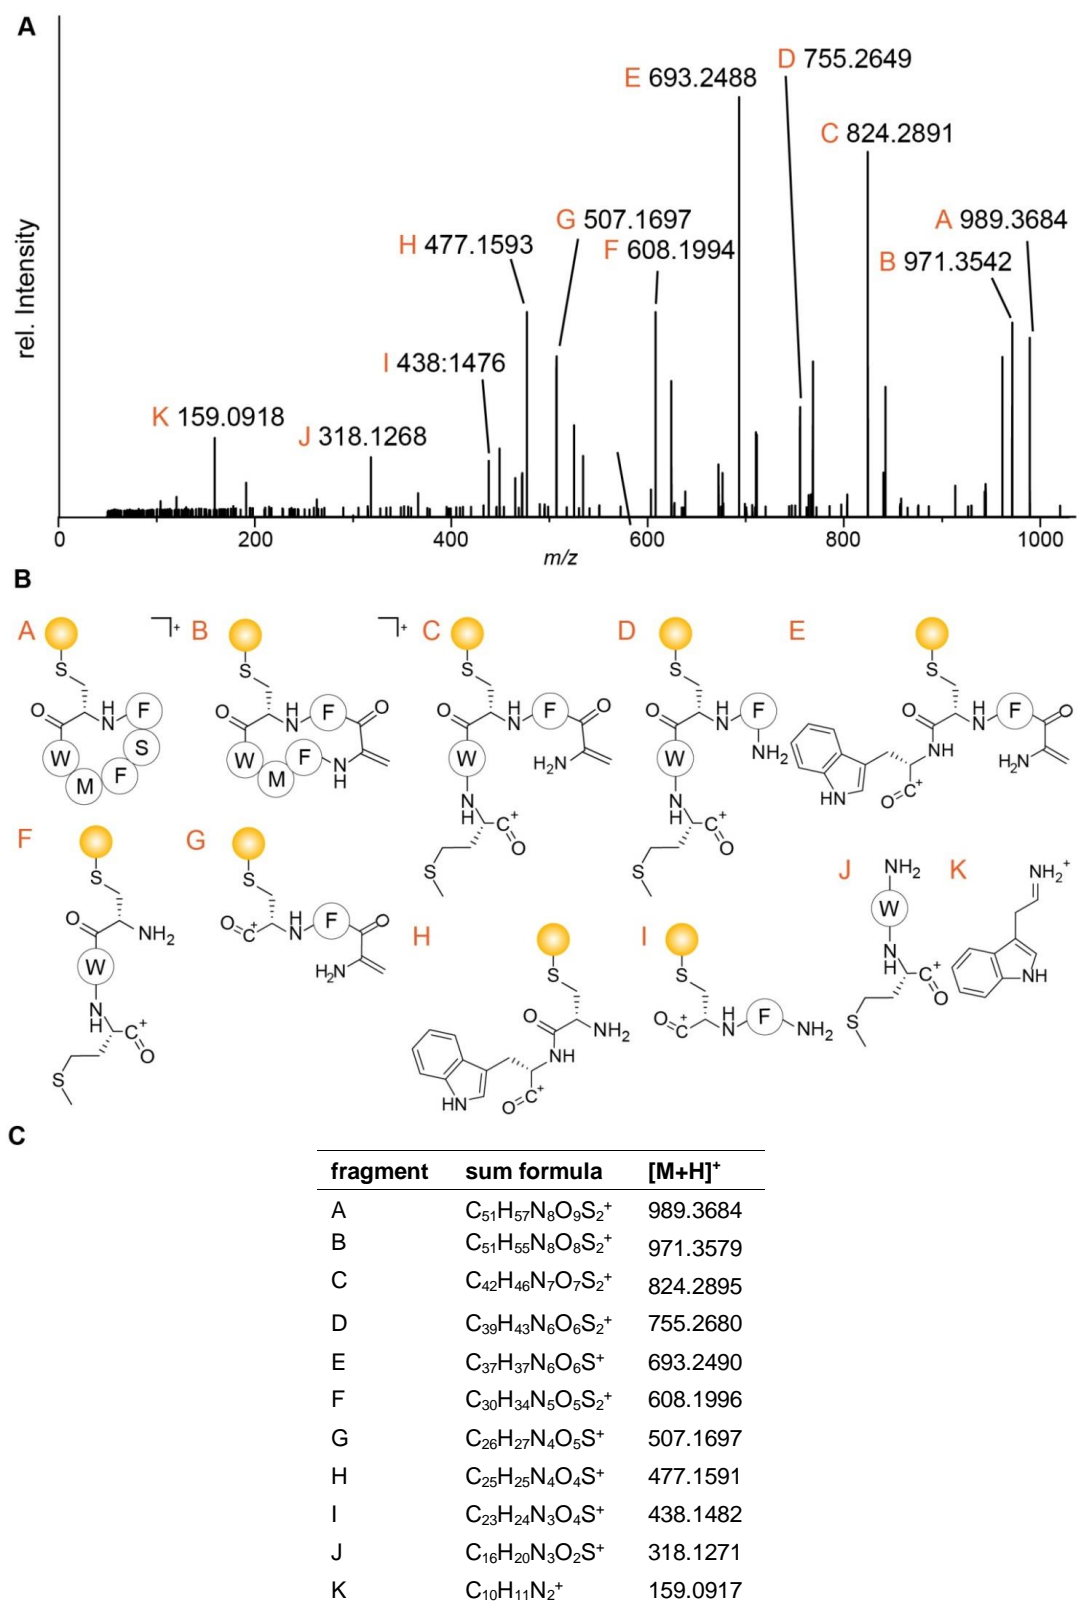



**Figure S29. Investigation of the stability of analogue 4.** Reaction scheme (above) and HPLC-HRMS chromatograms (below) (HPLC-HRMS method D) depicting the hydrolysis of derivative 4. The chromatograms (absorbance at  $\lambda=280$  nm) show *N*-terminally acetylated derivative 4 after incubation at 37 °C in 50 mM MOPS (pH 7.2) for the indicated time (d, days). For comparison, the extracted ion chromatograms (EICs) corresponding to 4 ( $m/z$  915.3494  $[M+H]^+$ ) and hydrolyzed 4 ( $m/z$  933.3600  $[M+H]^+$ ) are shown for the 3-day sample (the hydrolysis reaction is depicted below). After 3 days (the time-scale of the endospore formation assay), some of the compound was hydrolyzed but the majority remained unchanged.

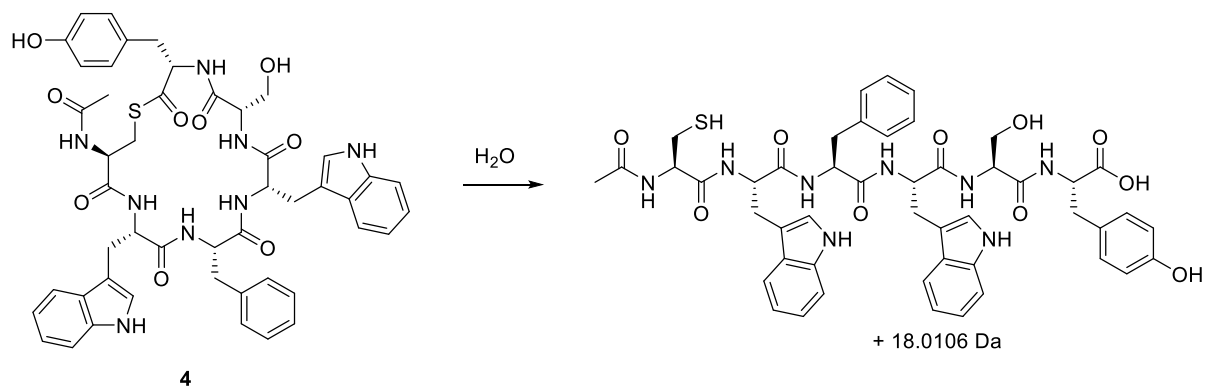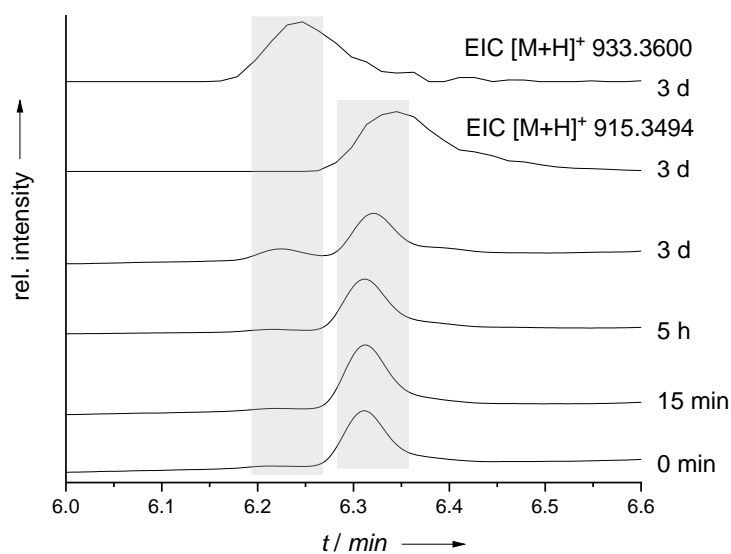

**Figure S30. Controls for determination of rearrangement kinetics using Ellman's reagent.** Shown is the increase of absorbance at 412 nm for the controls to determine the kinetics of rearrangement of the thiolactone moiety of **1** to the lactam, giving the cyclopeptide **2**. As a baseline, the values for Ellman's Reagent (ER) in 50 mM MOPS were subtracted from the measured values of **1** in 50 mM MOPS with ER.

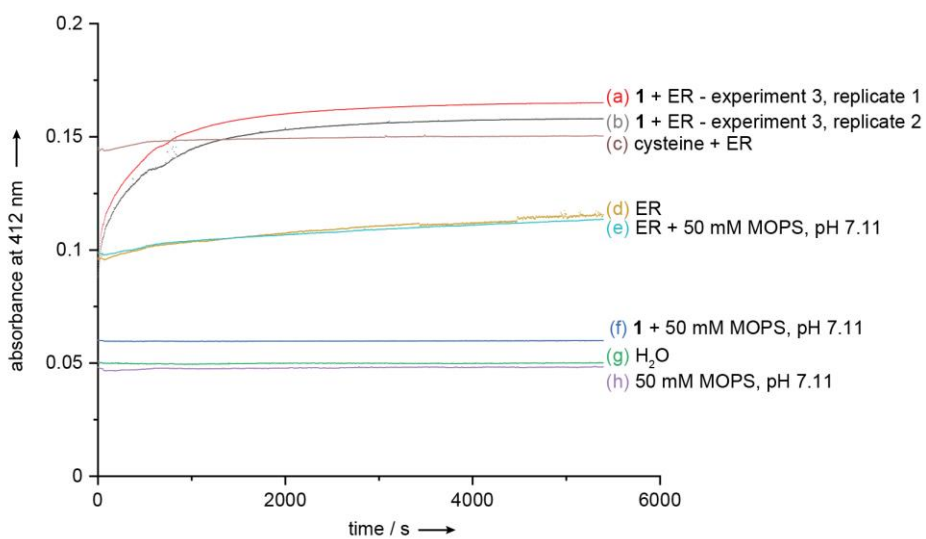

Figure S31. <sup>1</sup>H-NMR spectra of peptide 1a.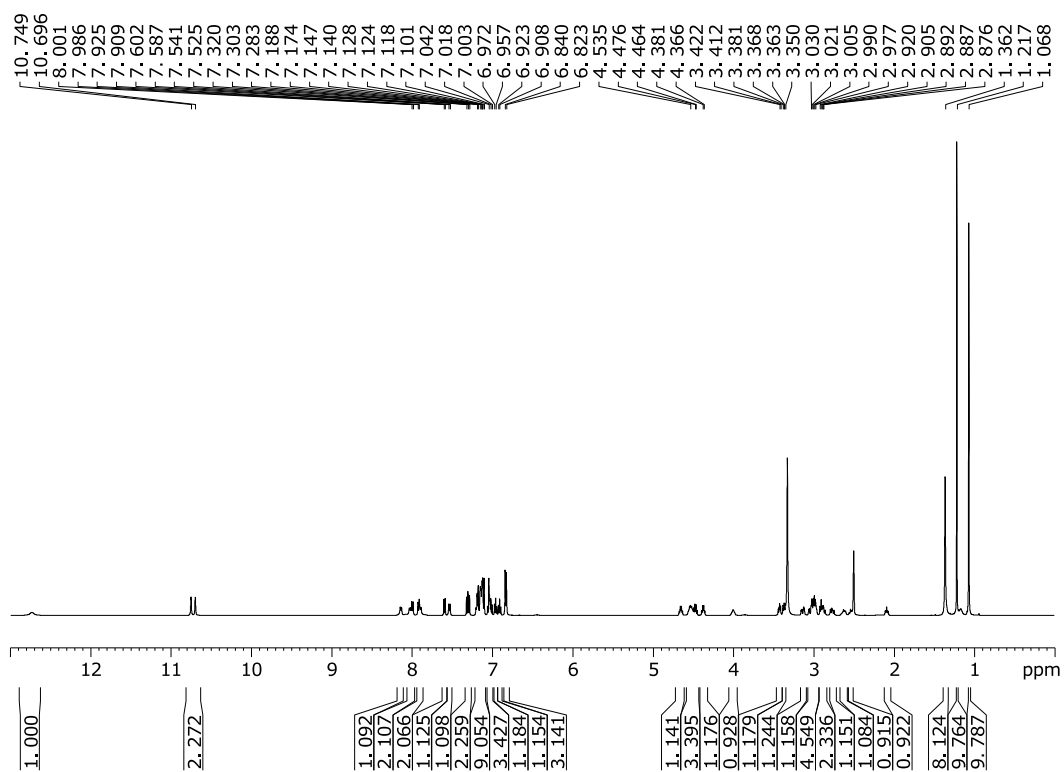

Figure S32.  $^{13}\text{C}$ -NMR spectrum of peptide 1a.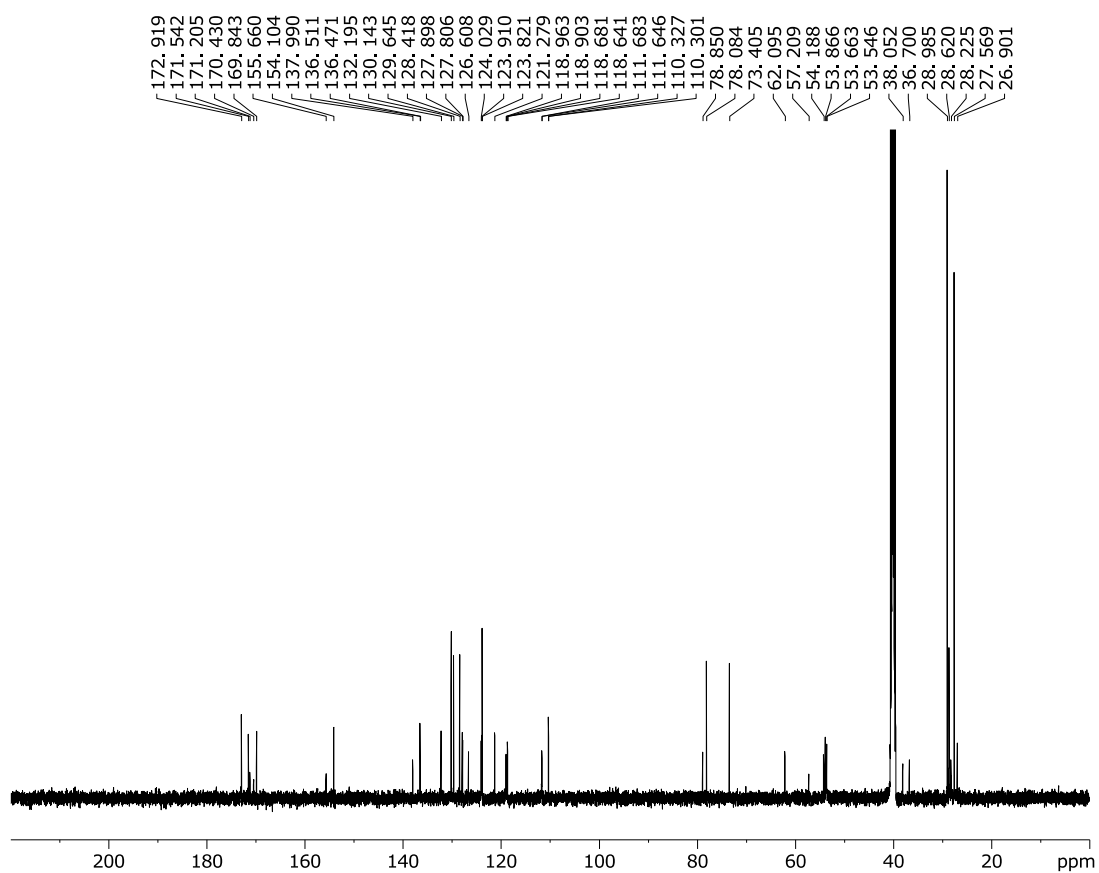

Figure S33.  $^1\text{H-NMR}$  spectrum of linear peptide 3.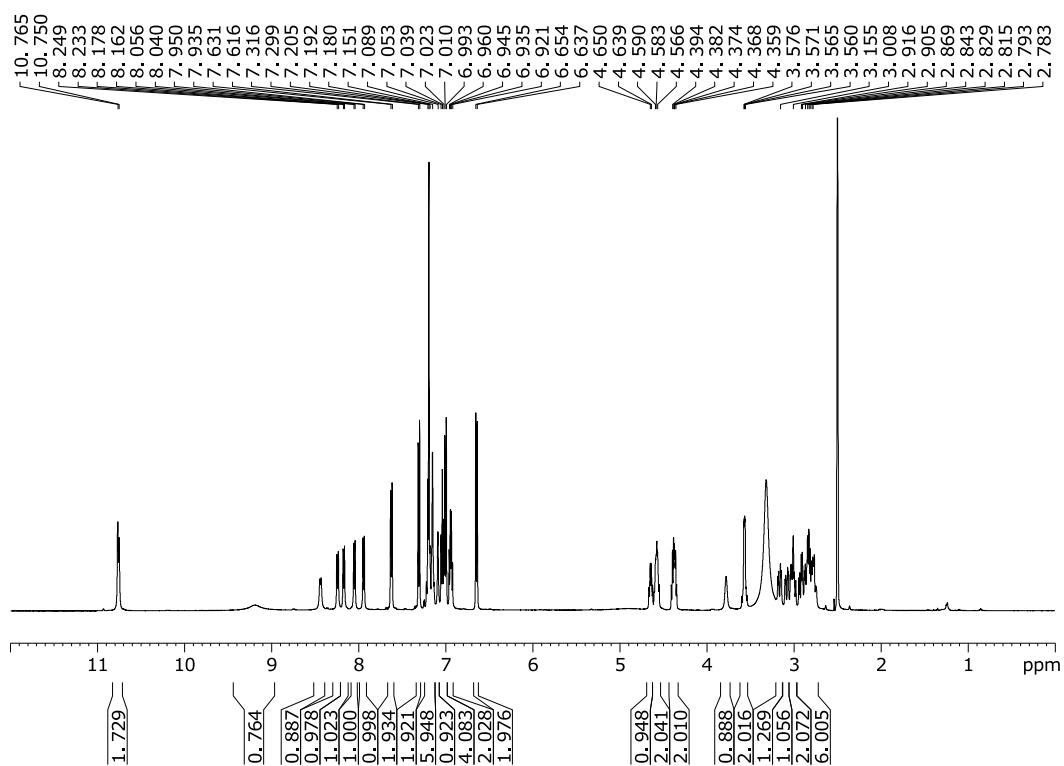

Figure S34.  $^{13}\text{C}$ -NMR spectrum of linear peptide 3.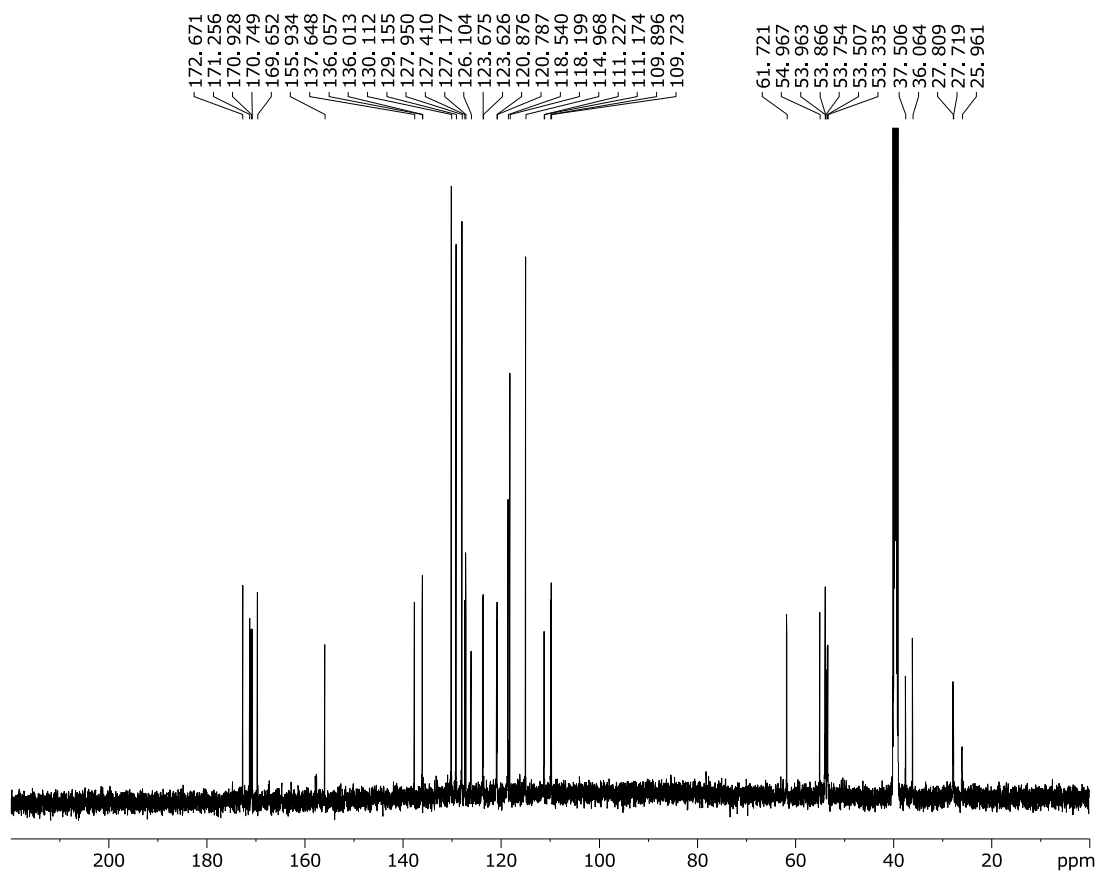

Figure S35.  $^1\text{H-NMR}$  spectrum of peptide 5a.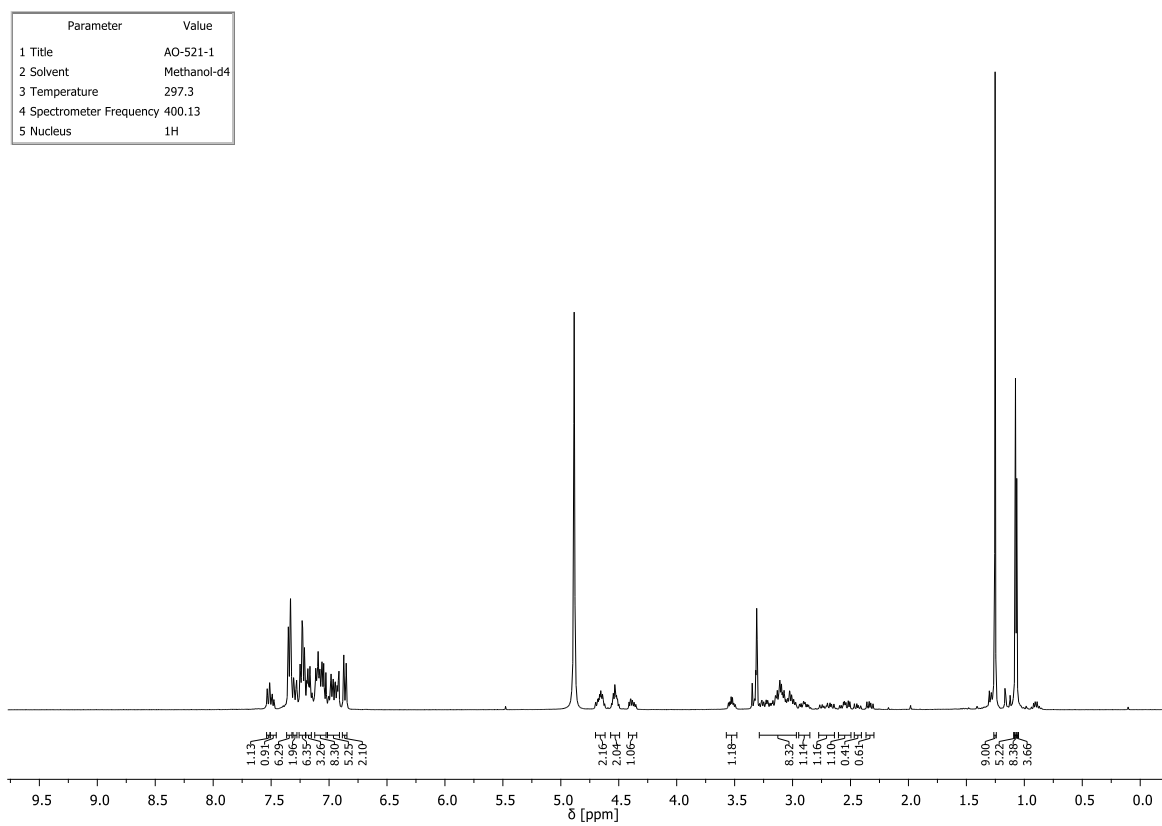

Figure S36.  $^{13}\text{C}$ -NMR spectrum of peptide 5a.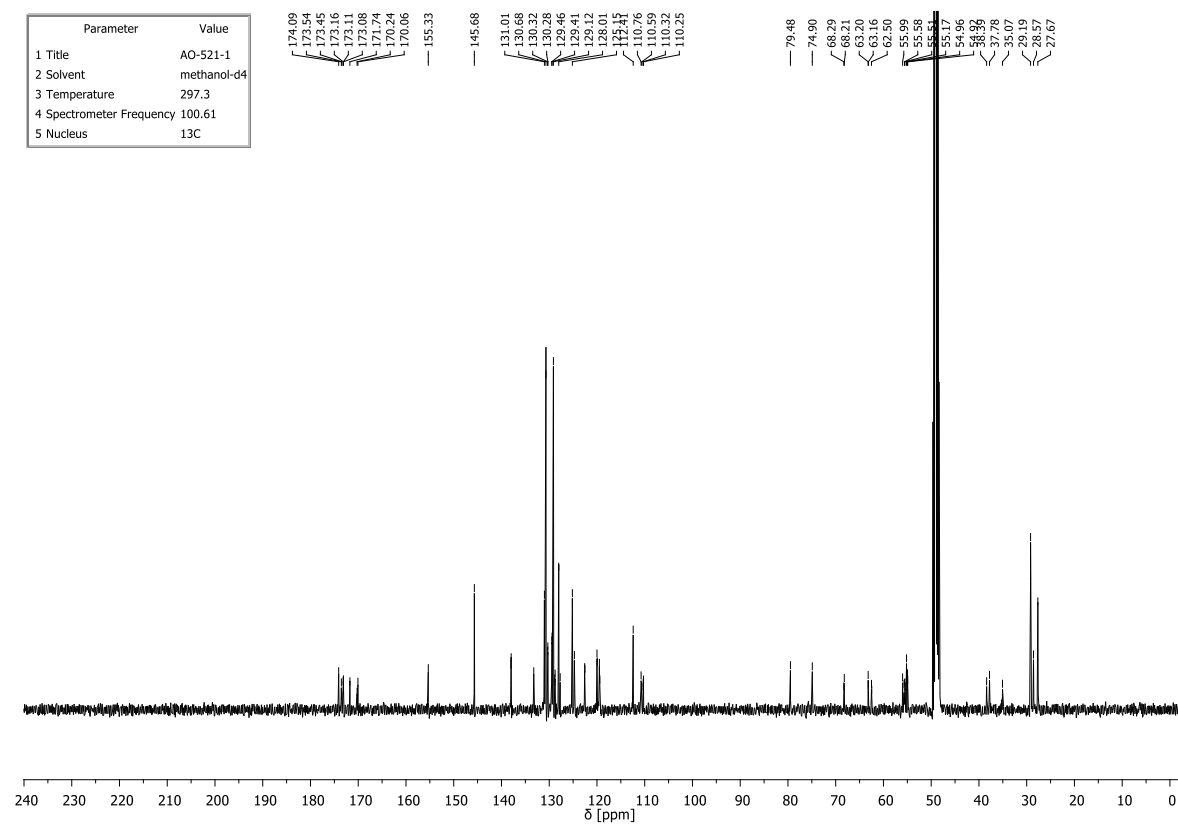



Figure S37.  $^1\text{H-NMR}$  spectrum of peptide 1b.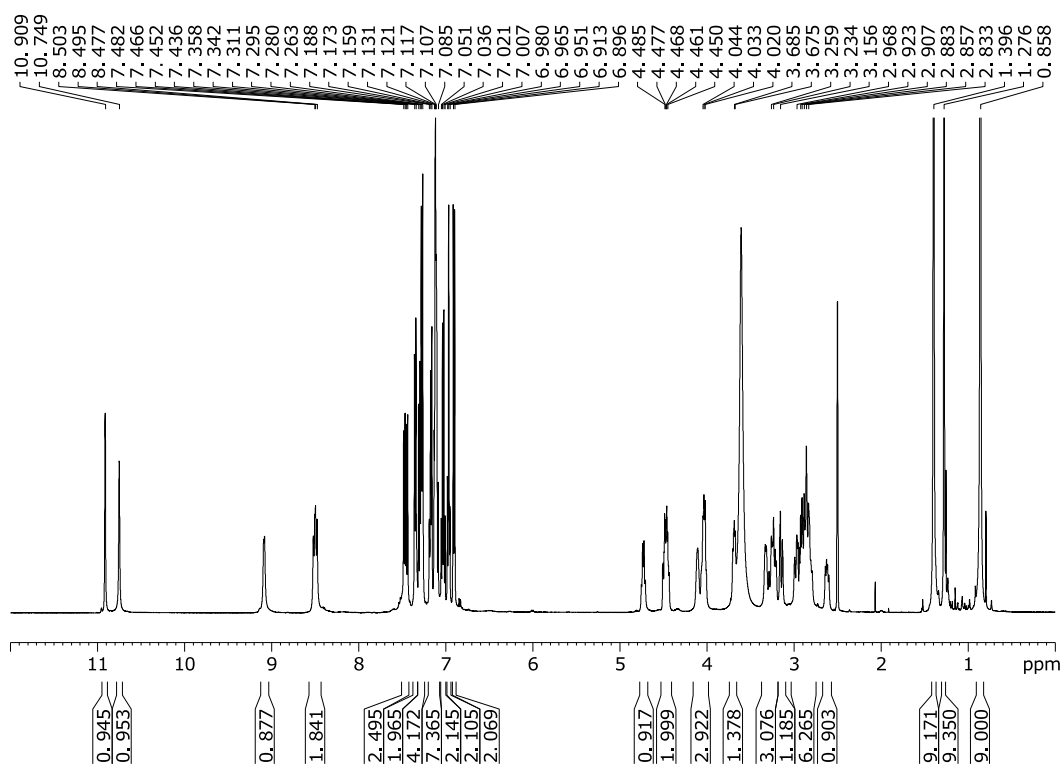

Figure S38.  $^{13}\text{C}$ -NMR spectrum of peptide 1b.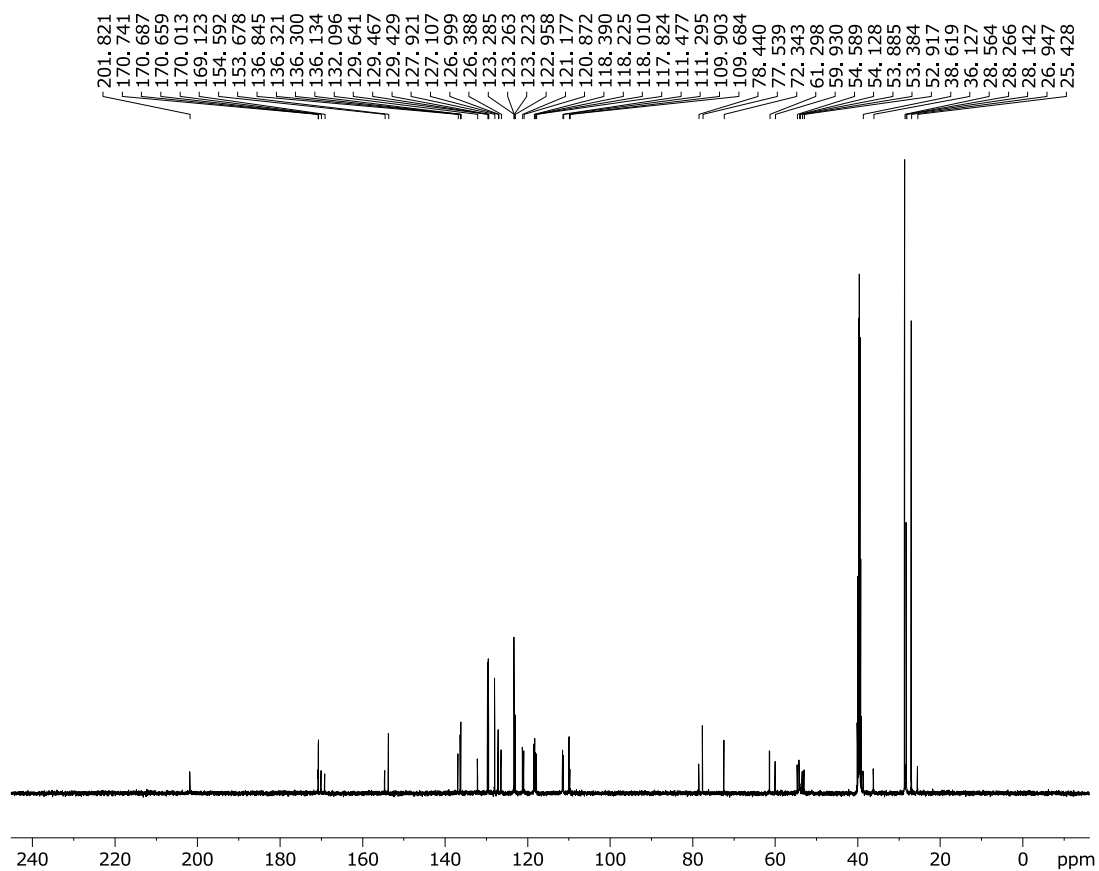

Figure S39. <sup>1</sup>H-NMR spectrum of thiolactone reference 1.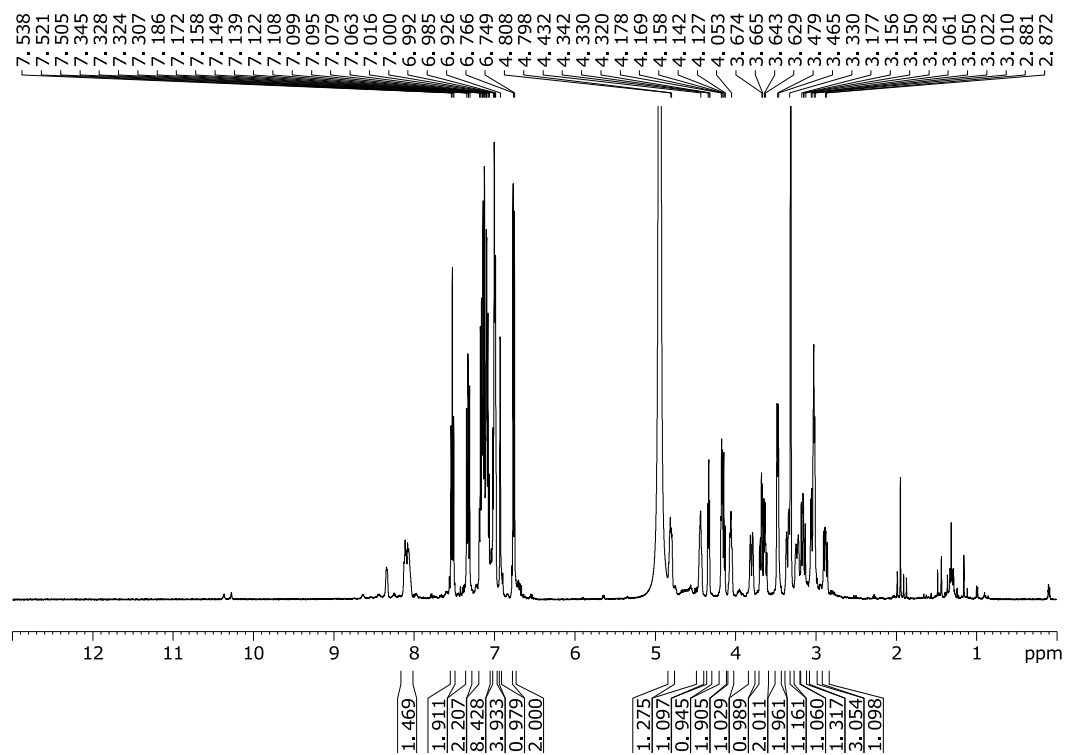

**Figure S40.**  $^{13}\text{C}$ -DEPT-NMR spectrum of thiolactone reference 1.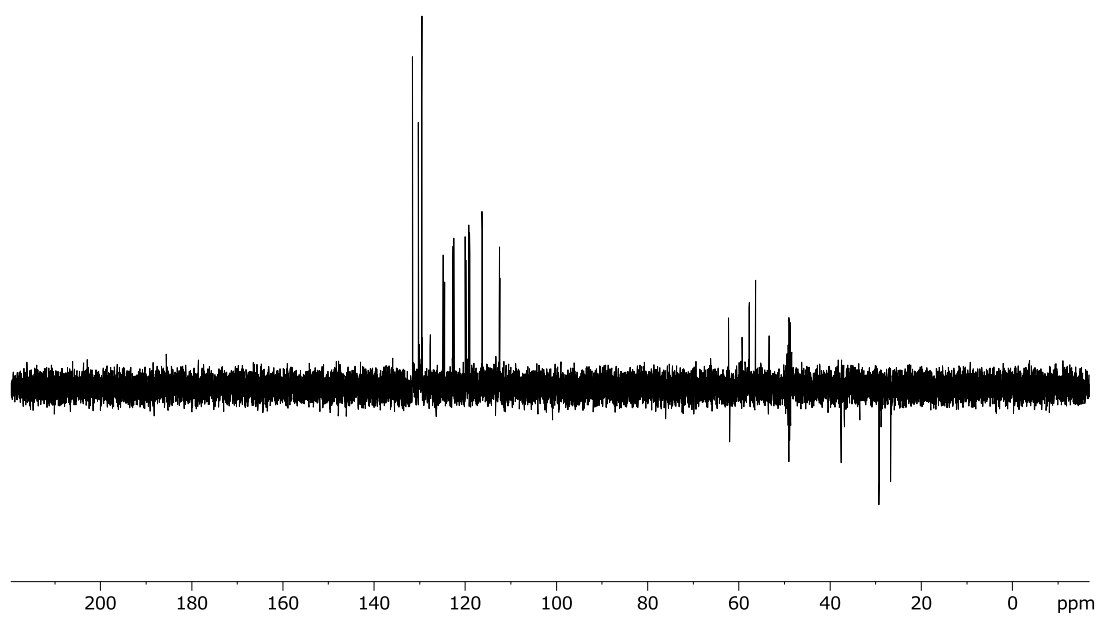

Figure S41.  $^1\text{H}$ , $^1\text{H}$ -COSY NMR spectrum of thiolactone reference 1.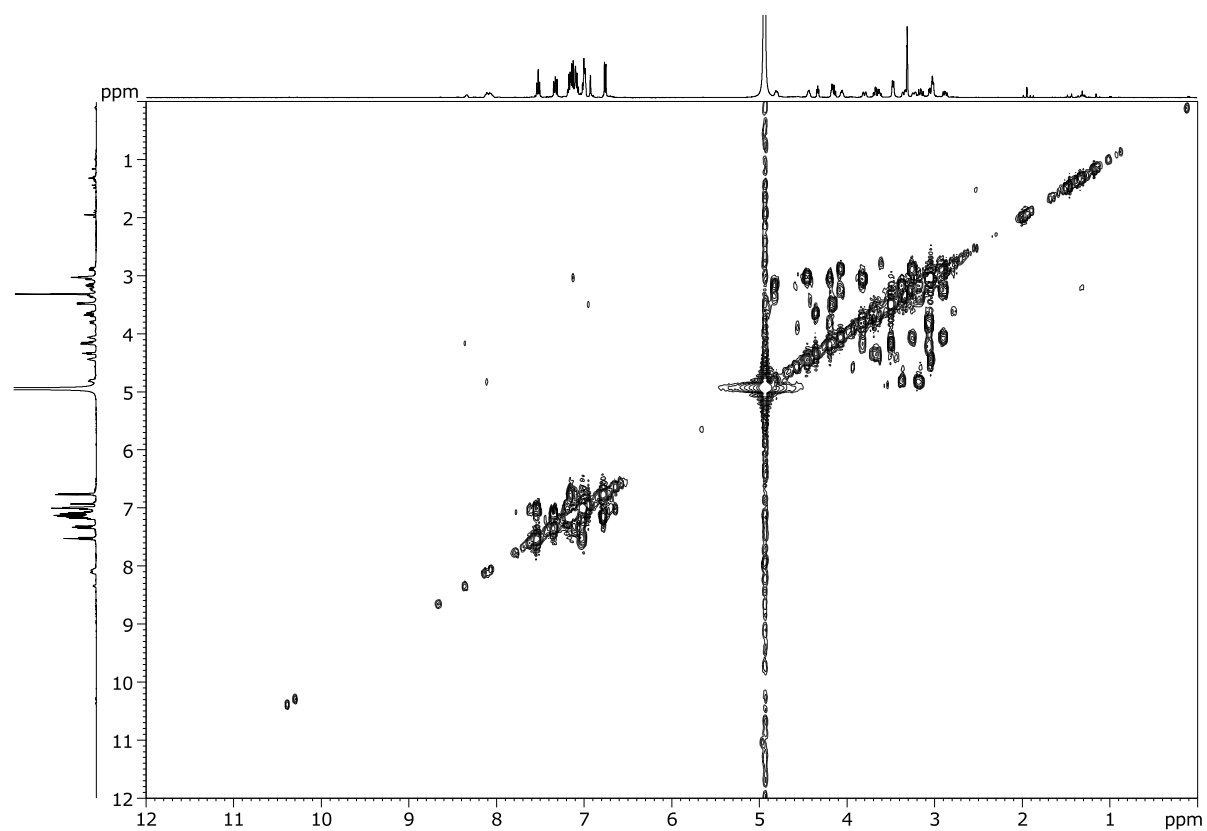

Figure S42.  $^1\text{H},^{13}\text{C}$ -HSQC NMR spectrum of thiolactone reference 1.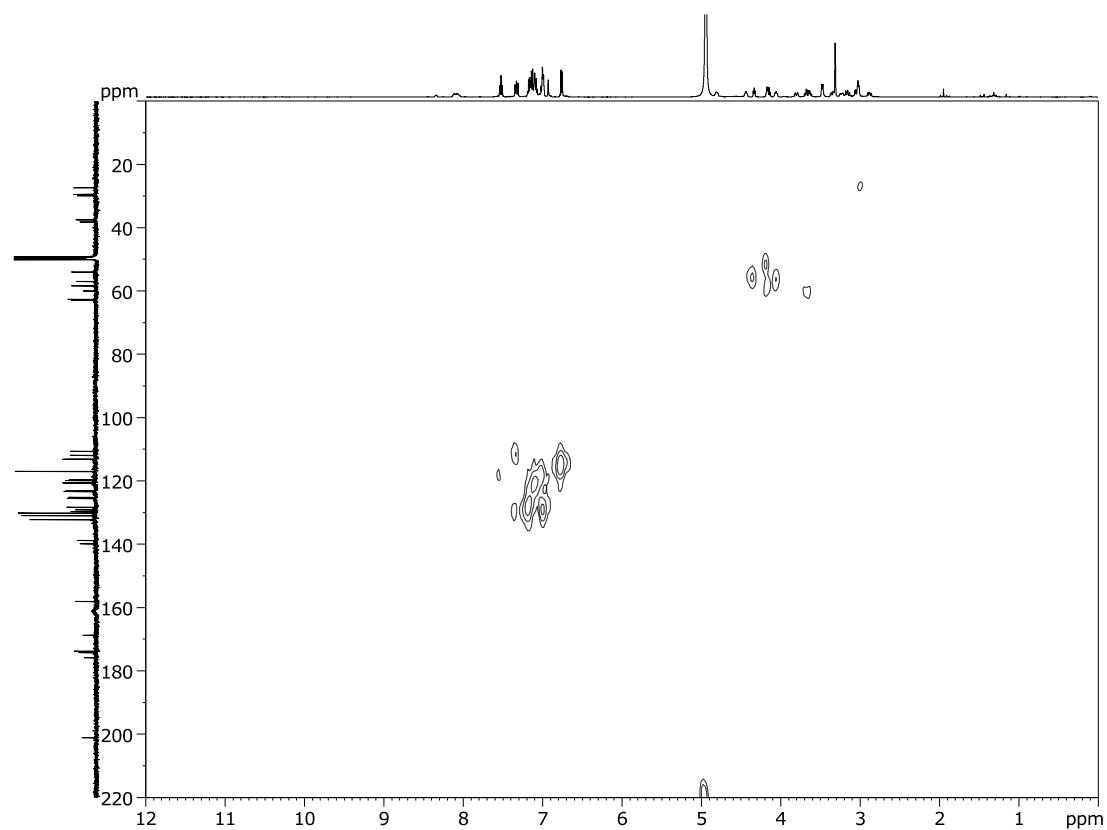

Figure S43.  $^1\text{H}$ ,  $^{13}\text{C}$ -HMBC NMR spectrum of thiolactone reference 1.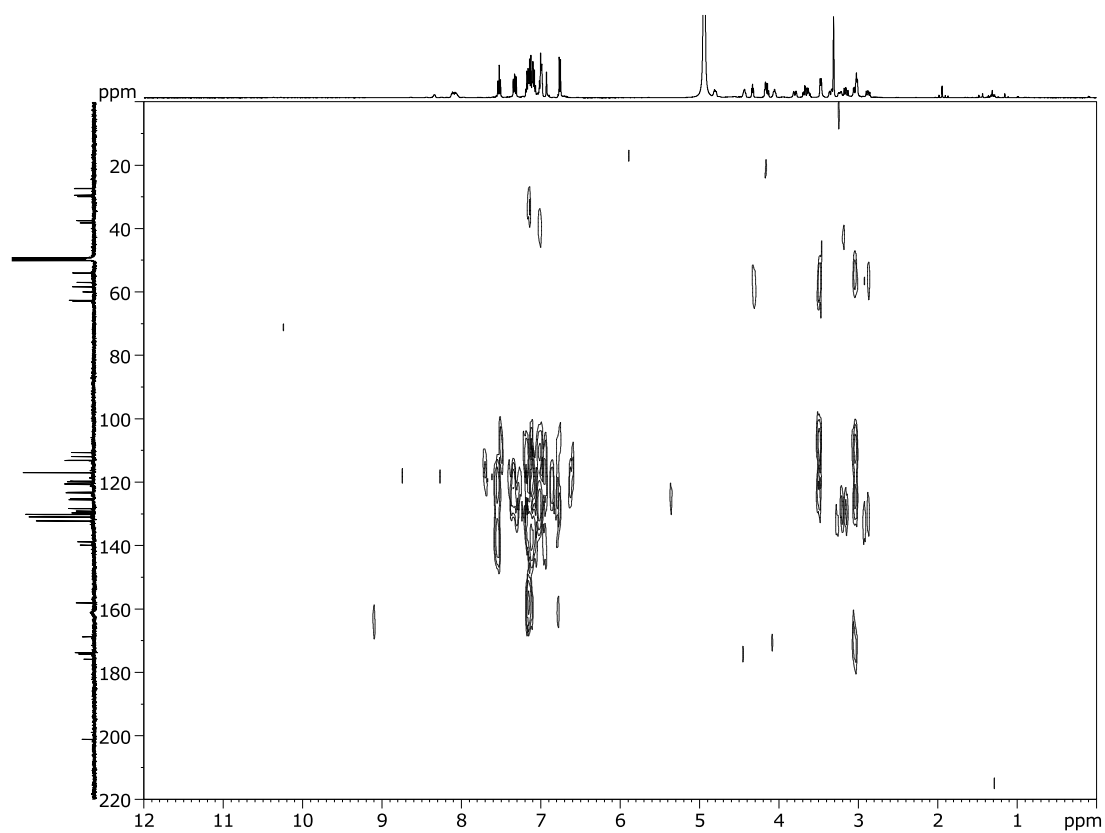

Figure S44. <sup>1</sup>H-NMR spectrum of cyclopeptide reference 2.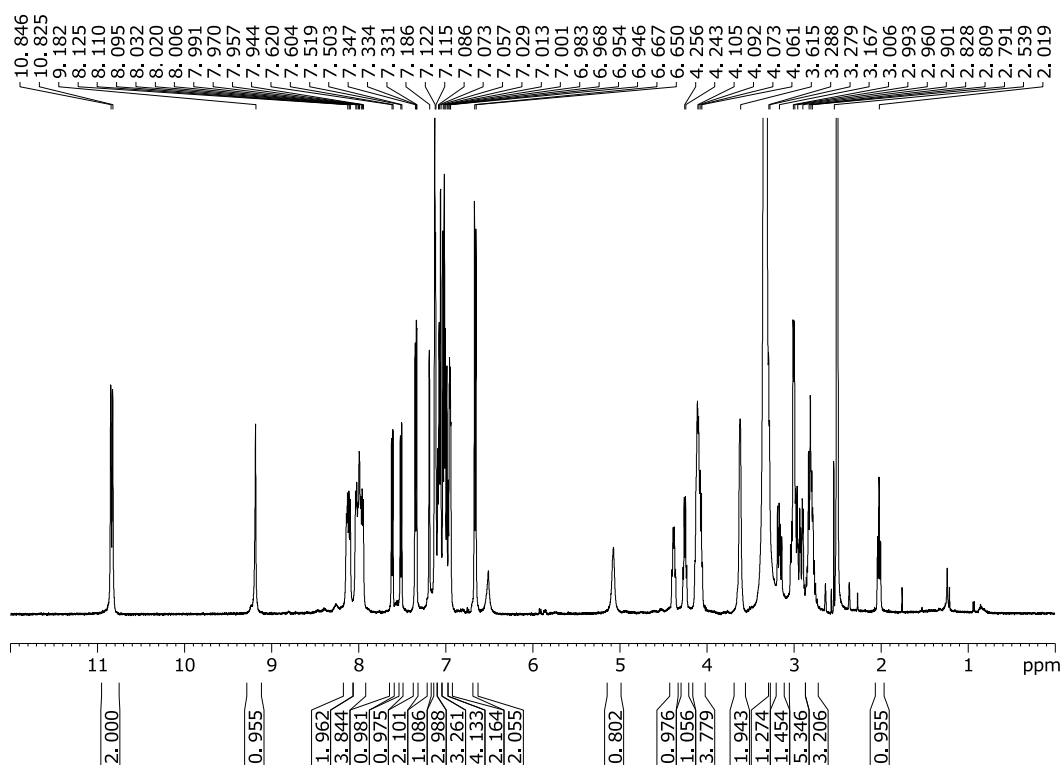



Figure S45.  $^{13}\text{C}$ -DEPT-NMR spectrum of cyclopeptide reference 2.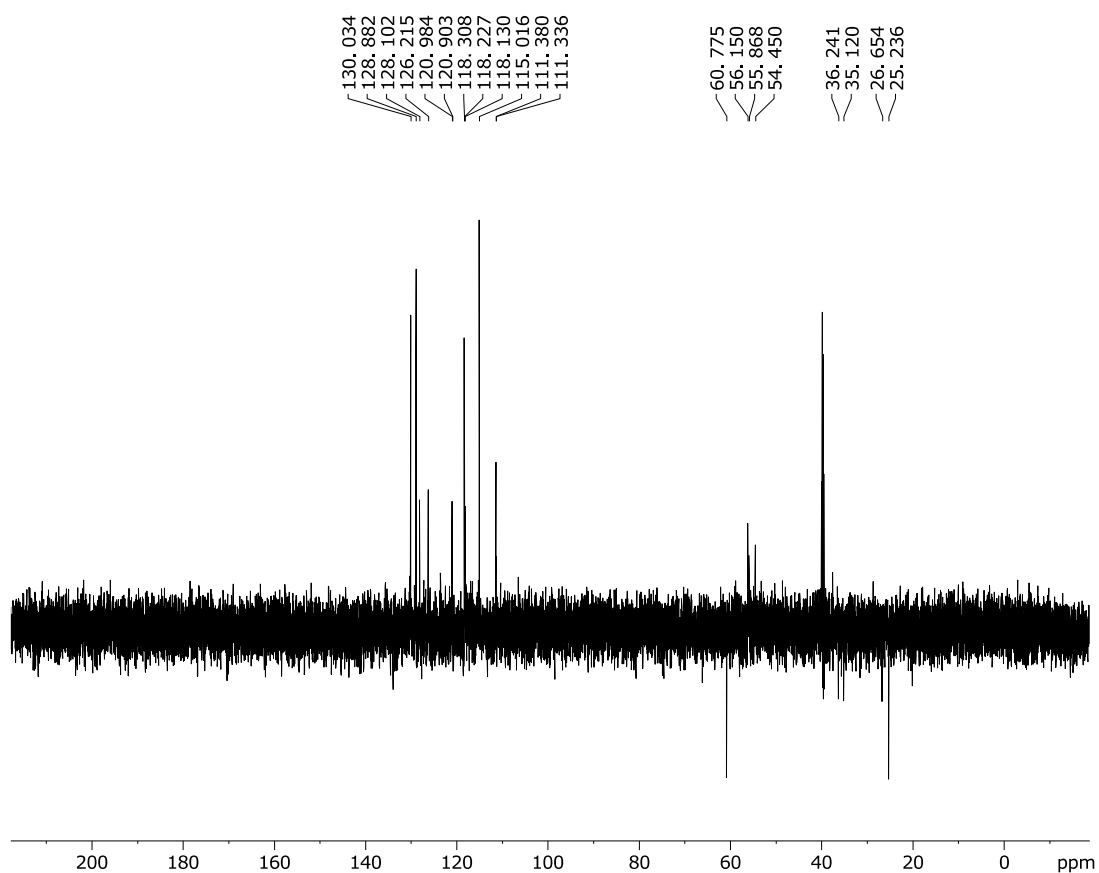

Figure S46.  $^1\text{H}, ^1\text{H}$ -COSY NMR spectrum of cyclopeptide reference 2.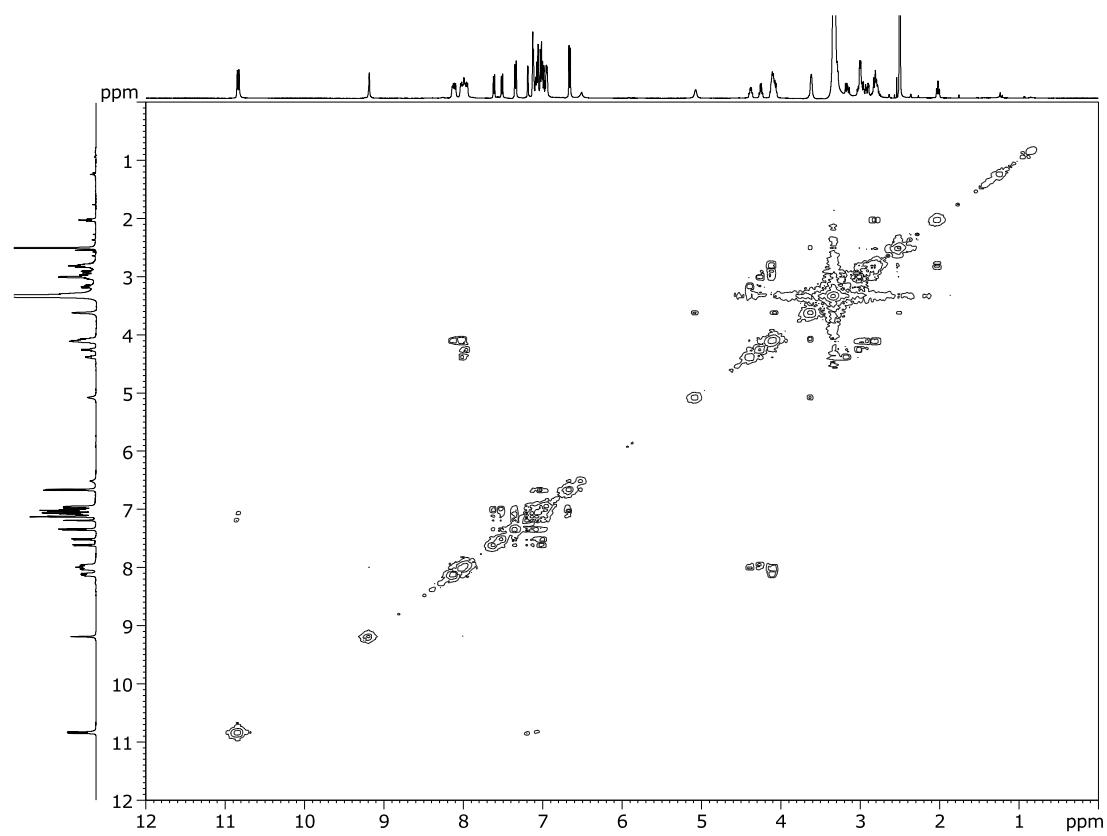

Figure S47.  $^1\text{H}$ ,  $^{13}\text{C}$ -HSQC NMR spectrum of cyclopeptide reference 2.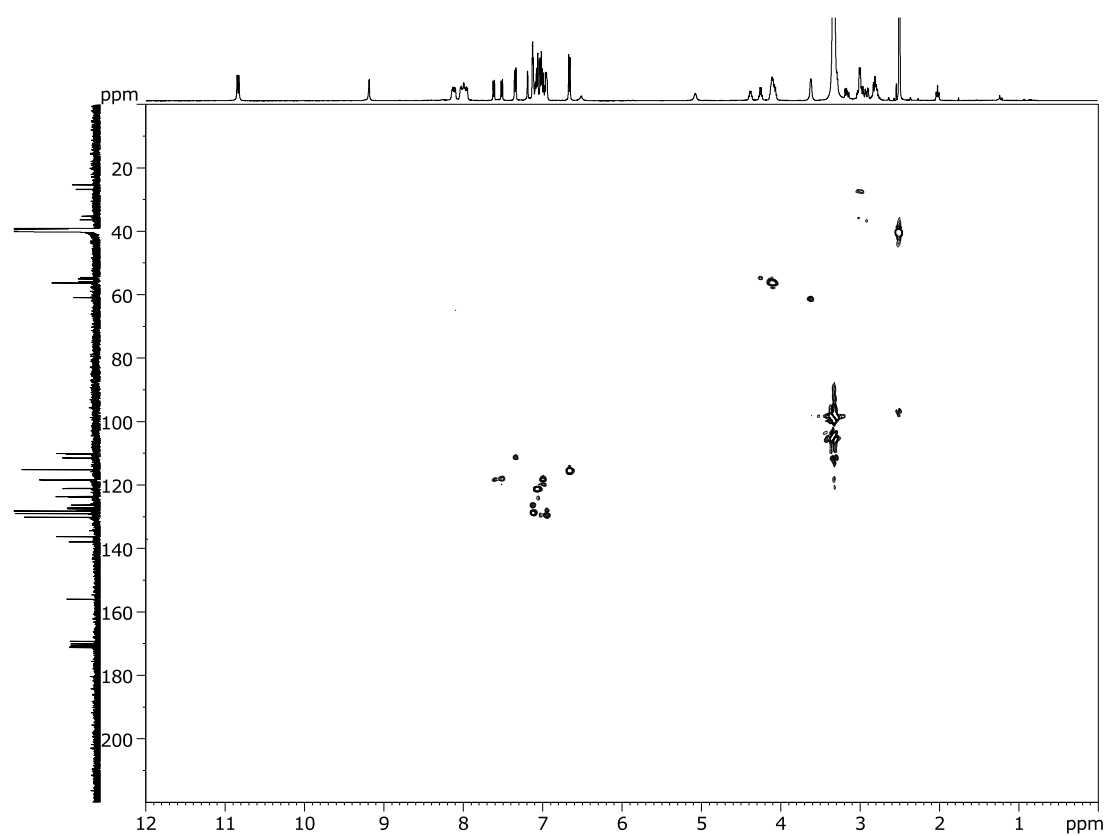

Figure S48.  $^1\text{H}$ ,  $^{13}\text{C}$ -HMBC NMR spectrum of cyclopeptide reference 2.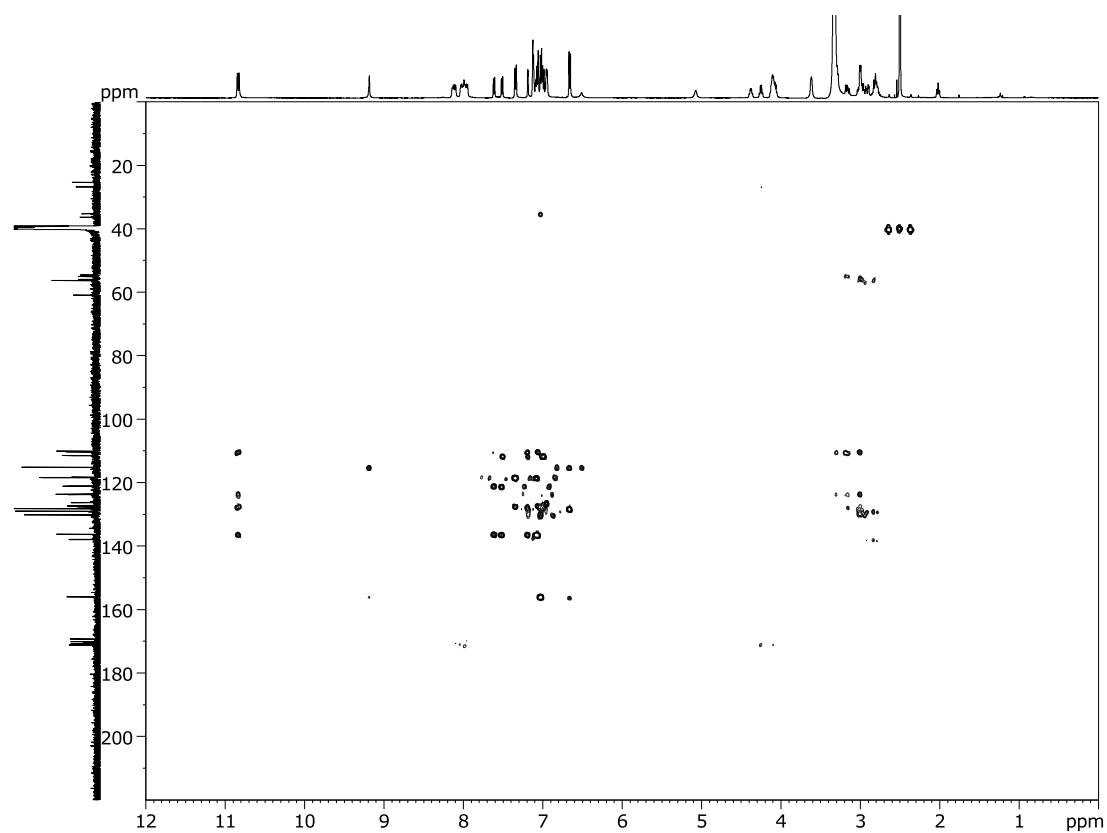

Figure S49.  $^1\text{H-NMR}$  spectrum of *N*-acetylated analogue 4.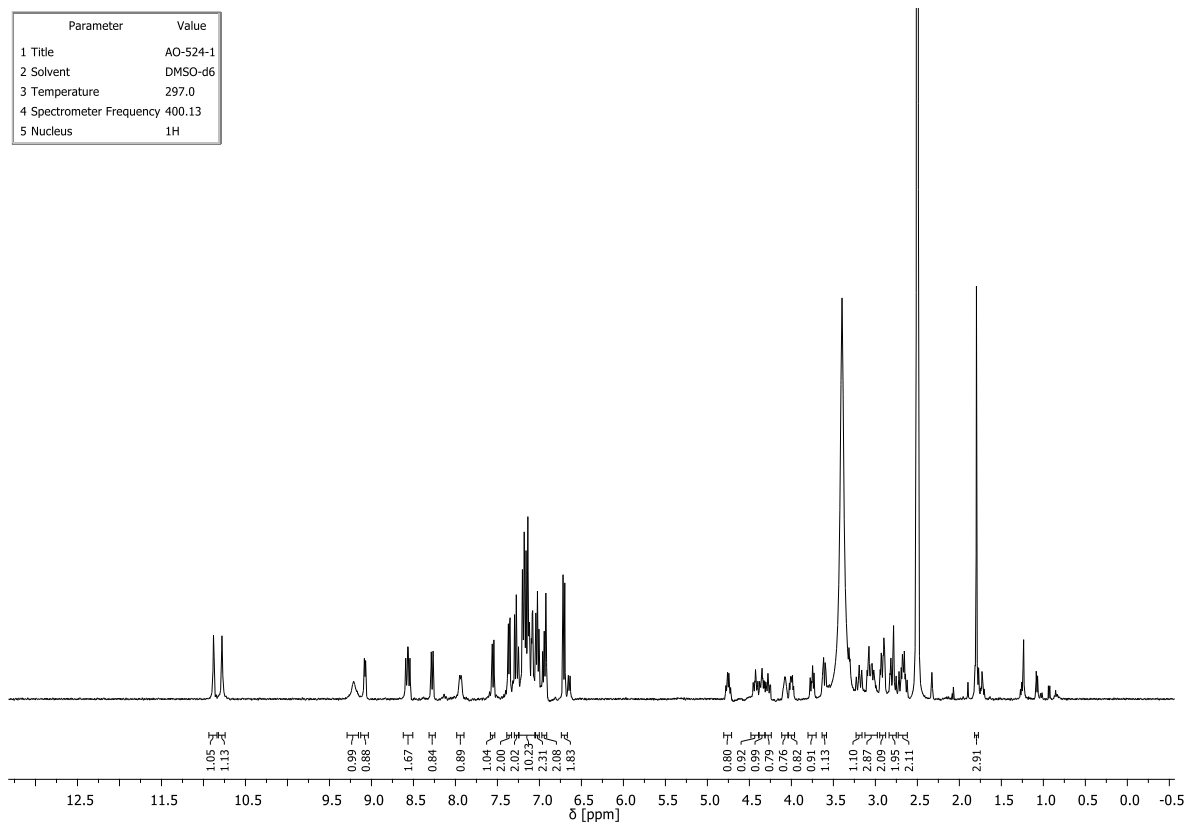

Figure S50.  $^{13}\text{C}$ -NMR spectrum of *N*-acetylated analogue 4.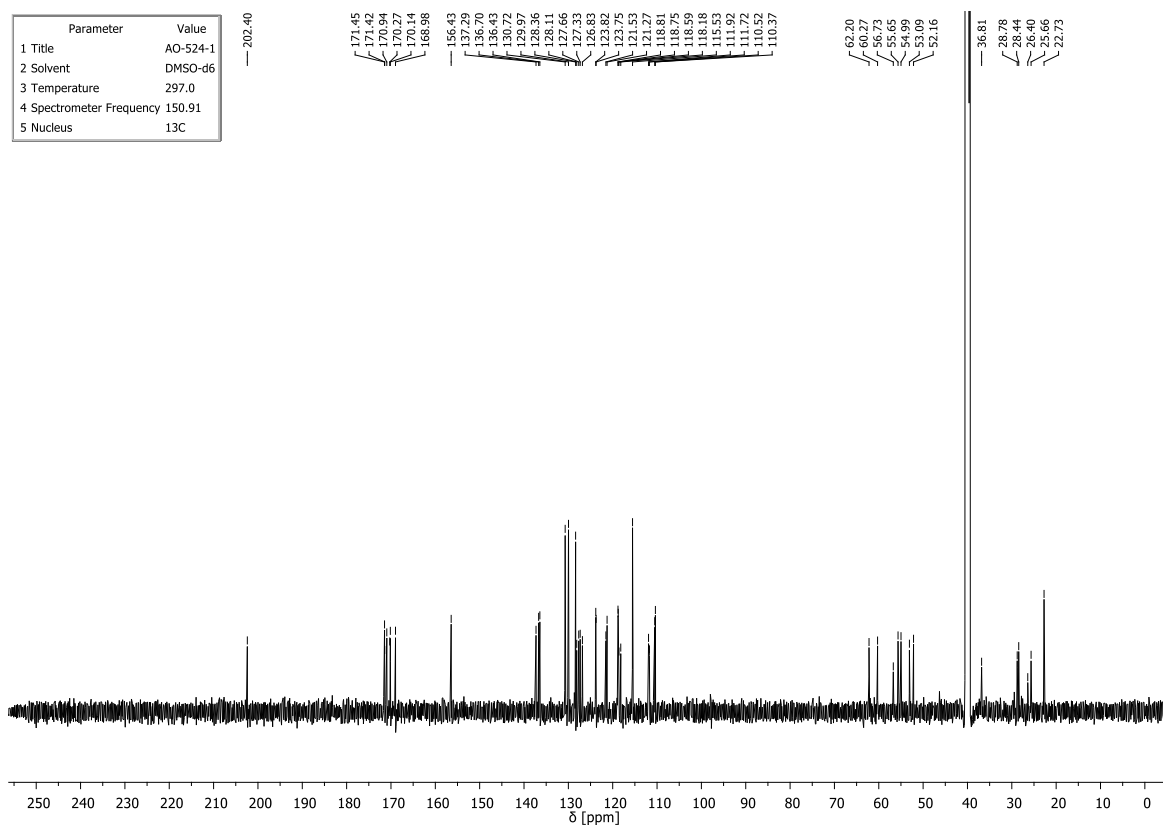

Figure S51.  $^1\text{H-NMR}$  spectrum of thiazole-containing analogue 5.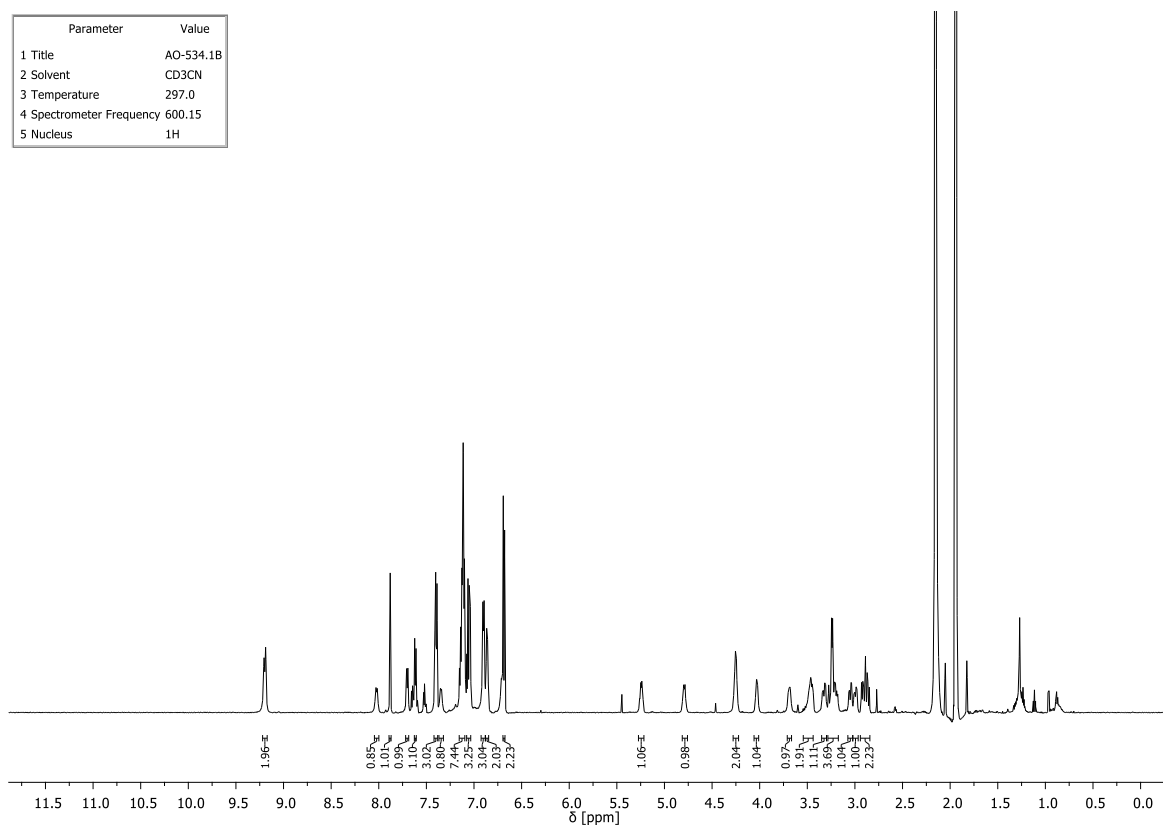

Figure S52.  $^{13}\text{C}$ -NMR spectrum of thiazole-containing analogue 5.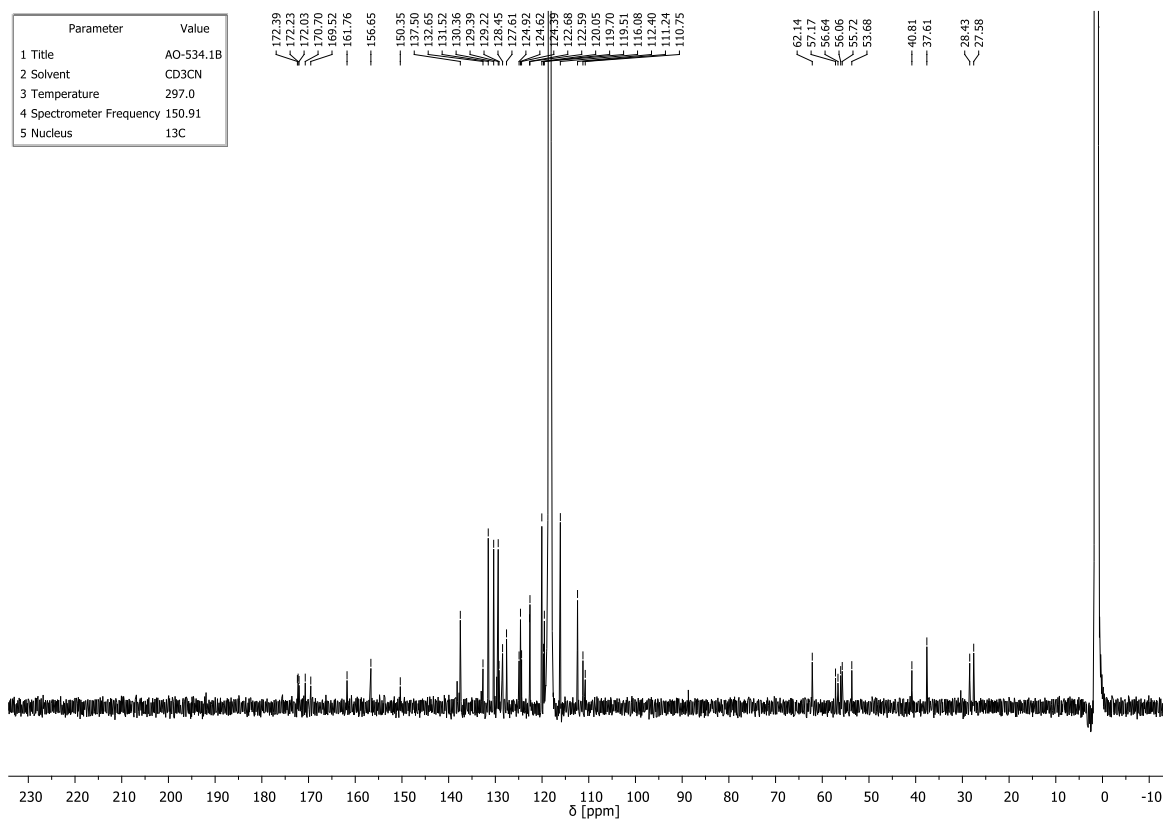



Figure S53. Structure elucidation of thiolactone 1 and cyclopeptide 2.

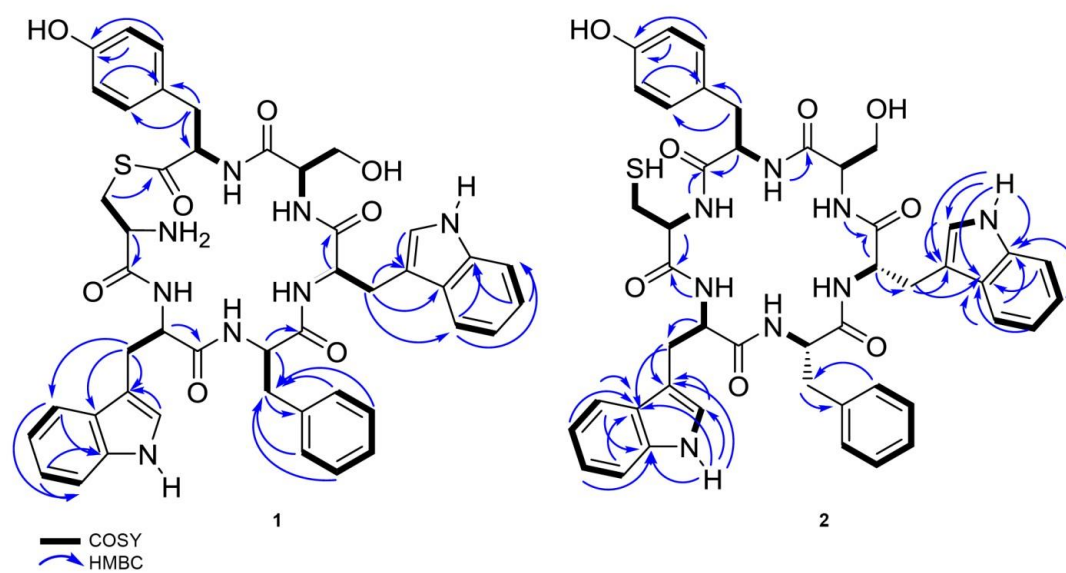

**Table S1. Putative AIP biosynthetic gene clusters identified in diverse Clostridia.** Strains that were screened in this study are highlighted in yellow. Clusters from which a compound was detected are colored red. The predicted core peptide sequence for each AgrD precursor peptide is underlined.

| Strain                                           | AgrB                | AgrD                | AgrA                    | AgrC                | Sequence of AgrD                                          | Mature cAIP sequence |
|--------------------------------------------------|---------------------|---------------------|-------------------------|---------------------|-----------------------------------------------------------|----------------------|
| <b>Ruminiclostridium cellulolyticum DSM 5812</b> | Ccel_0955           | Ccel_0957           | Ccel_0958               | -                   | MKSKIKFLLAPLSLIITQLALSGVCTACSSTFYQP<br>KAPKHLTANRTHS      | -                    |
|                                                  | Ccel_2798           | Ccel_2791           | Ccel_2790,<br>Ccel_2793 | -                   | MKSRIKFLAPLSLIITQLALSGVCSACCSLLYQP<br>KAPKHLTASRQHS       | -                    |
|                                                  | Ccel_2127           | Ccel_2126           | -                       | Ccel_2125           | MKGKIKLLVLTVLSLVGVFAATASAGACWFWSY<br>YQRECPKSLLK          | CWFWSY               |
|                                                  | Ccel_3455           | Ccel_3456           | -                       | Ccel_3457           | MRKNLLSSVGKVSIVTGLITGAASKILWLYKPE<br>K                    | -                    |
| <b>Ruminiclostridium josui DSM 25723</b>         | -                   | K412_RS21<br>970    | K412_RS011<br>6960      | K412_RS01<br>16955  | MKNKLIKLVLMALSIVIGITAATASAGACWMFSFY<br>QKECPTSLLK         | CWMFSF               |
|                                                  | K412_RS01<br>02150  | K412_RS21<br>625    | K412_RS010<br>2135      | K412_RS01<br>02140  | MKIRPHKIKLFLVLLGITMISLFFSTASANGCWLW<br>SMHQKCPESLIK       | -                    |
|                                                  | K412_RS01<br>11890  | K412_RS21<br>865    | -                       | -                   | MKSKIKLLAPLSLIITFLALSGVSTACCSYYQP<br>KAPKHLTTRKSH         | -                    |
|                                                  | K412_RS01<br>14620  | K412_RS21<br>915    | -                       | -                   | MNKKSKLLSIIDSNVTAIAEKKAENFSLWGHQP<br>RVPKSLTKIKK          | -                    |
|                                                  | K412_RS01<br>01445  | K412_RS21<br>605    | -                       | K412_RS01<br>01435  | MKGKIKLLVLTVLSLVGVFAATASAGACWFWSY<br>YQRECPKSLLK          | CWFWSY               |
|                                                  | K412_RS01<br>08210  | Unannotated         | -                       | K412_RS01<br>08220  | MKKNLLTVGKVSIVTGLITGAASKILWLYQPE<br>K                     | -                    |
| <b>Ruminiclostridium papyrosolvens DSM 2782</b>  | Cpap_1414           | Cpap_1415           | -                       | Cpap_1416           | MRKNLLSSVGKVSIVTGLITGAASKILWLYQPE<br>K                    | -                    |
|                                                  | Cpap_0110           | Cpap_0111           | -                       | Cpap_0112           | MKGKIKLLVLTVLSLVGVFAATASAGACWFWSY<br>YQKDCPKSLLK          | CWFWSY               |
|                                                  | Cpap_0129           | Cpap_0138           | -                       | -                   | MKSKIKFLLTPLSIITLLALSGVCSACMSSYYQP<br>KAPKHLKHKH          | -                    |
|                                                  | Cpap_3744           | Cpap_3749           | -                       | -                   | MKAKIKLFLVPLSLIITLLALSGVCSACYGYYYQ<br>PKAPKHLTVRRSH       | -                    |
|                                                  | Cpap_1450           | Cpap_1451           | -                       | -                   | MDNTKKILSLIDSGVTKVAETKADNFCFLWGYQ<br>PKTPKALKKIKK         | CFLWG                |
| <b>Clostridium acetobutylicum DSM 792</b>        | CA_C0078            | CA_C0079            | CA_C0081                | CA_C0080            | MNLKELQNKVNDKFIKGLGKASMKIGEANGKC<br>VLVTLVEPKMPEELLKENIDK | CVLVTL               |
| <b>Clostridium cellulovorans DSM 3052</b>        | CLOCEL_R<br>S06570  | CLOCEL_R<br>S06575  | CLOCEL_RS<br>06550      | CLOCEL_R<br>S06555  | MRKTKSKVLSLFAVLTTVIASMVASSACFWYY<br>QPEEPEILRDK           | -                    |
|                                                  | CLOCEL_R<br>S06160  | CLOCEL_R<br>S22225  | -                       | -                   | MKNSNKKVLSLISAITTKAEDLSNSTCVTALYQ<br>PKPEKSLQKK           | CVTAL                |
|                                                  | CLOCEL_R<br>S21235  | Clocel_425<br>4     | CLOCEL_RS<br>21225      | CLOCEL_R<br>S21230  | MRNMREELIKIGDMVIGEIGNEAVKLGDRARGL<br>CLFLNVYEPVPIELDDIE   | -                    |
| <b>Hungateiclostridium thermocellum DSM 1313</b> | Clo1313_09<br>47    | Clo1313_09<br>46    | -                       | Clo1313_09<br>45    | MLRALKALKRSDLLALLGWLSVIAIFIAQASSNS<br>CTSWAIEQPKIPKSLIKQD | -                    |
|                                                  | Clo1313_30<br>21    | -                   | -                       | -                   | -                                                         | -                    |
|                                                  | -                   | Clo1313_28<br>18    | -                       | -                   | MKNKVLSAISAVLFIASMVASSAFFIFYQPKTP<br>KALKK                | -                    |
| <b>Clostridium botulinum A ATCC 3502</b>         | CBO_RS01<br>850     | CBO_RS01<br>855     | -                       | CBO_RS01<br>840     | MKQKKEKCTKVTAKLLKSVAYSTADSACHLGI<br>YQPKPKSLRK            | -                    |
|                                                  | CBO_RS01<br>815     | CBO_RS01<br>820     | -                       | -                   | MKKNKVLMLVATFTLLASIVASSACYWCYV<br>QPKPKCLREE              | -                    |
| <b>Clostridioides difficile DSM 1296</b>         | CDIF1296T<br>_02890 | Unannotated         | -                       | -                   | MKKFIVRFMKFASSLALSTAILSANSTCPWIIHQ<br>KVPKEISNLKKTN       | -                    |
|                                                  | CDIF1296T<br>_03445 | CDIF1296T<br>_03446 | CDIF1296T_0<br>3448     | CDIF1296T<br>_03447 | MKKIALNLLKNISALSFGIAVLSANSASSWVAHQ<br>AKEPQALQKLLK        | -                    |

**Table S1 (continued). Putative AIP biosynthetic gene clusters identified in diverse Clostridia.** The predicted core peptide sequence for each AgrD precursor peptide is underlined.

| Strain                                    | AgrB          | AgrD          | AgrA          | AgrC                        | Sequence of AgrD                                            | Mature cAIP sequence |
|-------------------------------------------|---------------|---------------|---------------|-----------------------------|-------------------------------------------------------------|----------------------|
| <i>Clostridium pasteurianum</i> DSM 525   | F502_RS 14735 | F502_RS 20285 | -             | F502_RS14740                | MKNKLNKNTLKKNISVIFKRTAFSTSASACTFSEFYQ<br>PKEPKCLQKK         | -                    |
|                                           | F502_RS 05975 | F502_RS 05970 | -             | -                           | MKKKLLIVVAAVTTVVASVIASSACVFFFYQPEEP<br>KCLQKR               | -                    |
|                                           | F502_RS 04745 | F502_RS 20410 | F502_RS 04750 | F502_RS04780                | MRTLKIKKICIAIALCTVSMIIAETSSSMCLFFLAKE<br>TKMPKSLYKVD        | -                    |
|                                           | F502_RS 13030 | F502_RS 21025 | -             | -                           | MRNMKAKISDFTEKFADVIGEVSIIKISDKTCEKCF<br>ILGIYEPNPIEILKENARK | -                    |
|                                           | F502_RS 17030 | F502_RS 21050 | F502_RS 17020 | F502_RS17025                | MINKKLHKSILNKAGFCLIAVASFITVSSSLFLLGE<br>PTPPKSLYND          | -                    |
|                                           | F502_RS 04435 | F502_RS 20040 | F502_RS 04450 | F502_RS04440                | MKNIKNLLVSRSMKIAGFVALFLGTIVITPASTLGS<br>HQPCKPDEFLK         | -                    |
| <i>Clostridium perfringens</i> ATCC 13124 | CPF_RS0 8805  | CPF_RS0 8800  | -             | -                           | MKKLNKNLLTLFAALTTVVATTVATSACLWFTHQ<br>PEEPKSLRDE            | -                    |
|                                           | CPF_RS0 4265  |               | -             | -                           | MRKSILSMLALLTTLTINASTTSFATIGLEEMPES<br>MKKSR                | -                    |
| <i>Clostridium puniceum</i> DSM 2619      | CLPUN_5 2280  | CLPUN_5 2290  | -             | -                           | MENKIKKSIVVLVSNLCTKMALSVSASACLWNSY<br>QPKEPKCLEKWNKEL       | -                    |
|                                           | -             | CLPUN_4 4270  | -             | -                           | MVNYLKKSLTSFISAICTQMAFTVSASACNWSF<br>QPEEPKCLRNKE           | -                    |
|                                           | CLPUN_5 3090  | CLPUN_5 3100  | CLPUN_5 3130  | CLPUN_53110,<br>CLPUN_53120 | MQKSISFFSVMLLNLFKLVSKTSCPLTWGEPDYP<br>KELLK                 | -                    |
|                                           | CLPUN_1 5330  | CLPUN_1 5270  | CLPUN_1 5320  | CLPUN_15310                 | MKITKIKSFLALSLSAVAMLVASVSSTMCTHFEE<br>PKMPKSLYKVD           | -                    |
|                                           | CLPUN_1 9800  | CLPUN_1 9810  | -             | CLPUN_19820                 | MIKKILGEFLKSLSDVMITEATASLVGSGVEEMPE<br>SMKKLR               | -                    |
|                                           | CLPUN_1 3950  | CLPUN_1 3960  | -             | CLPUN_13970                 | MIKKIFGEILKISDSMITLAPASYWGSVEEMPK<br>SLKNLR                 | -                    |
| <i>Clostridium tetani</i> ATCC 13124      | -             | -             | -             | -                           | -                                                           | -                    |

**Table S2. Strains used in this study.**

| Strain                                                       | Relevant genotype and descriptions                                        | Source                                                                            |
|--------------------------------------------------------------|---------------------------------------------------------------------------|-----------------------------------------------------------------------------------|
| <i>Ruminiclostridium cellulolyticum</i>                      | Wild type: DSM 5812                                                       | Leibniz Institute DSMZ-German Collection of Microorganisms and Cell Cultures GmbH |
| <i>R. cellulolyticum</i> $\Delta agrD1$                      | CRISPR-nCas9-inactivated Ccel_2126                                        | This study                                                                        |
| <i>R. cellulolyticum</i> $\Delta agrD1$ pCPthl-empty         | <i>R. cellulolyticum</i> $\Delta agrD1$ with empty expression plasmid     | This study                                                                        |
| <i>R. cellulolyticum</i> $\Delta agrD1$ pCPthl- <i>agrD1</i> | <i>R. cellulolyticum</i> $\Delta agrD1$ with Ccel_2126 expression plasmid | This study                                                                        |
| <i>Escherichia coli</i> TOP10                                | General cloning strain                                                    | Laboratory strain                                                                 |

**Table S3. Plasmids used in this study.**

| Plasmid              | Description                                                                                                              | Source     |
|----------------------|--------------------------------------------------------------------------------------------------------------------------|------------|
| pCasC                | Expresses <i>cas9</i> nickase (D10A). Amp <sup>R</sup> , Gm <sup>R</sup> , Ery <sup>R</sup> . 11.2 kb                    | [4]        |
| pCasC-Ccel2126-KO    | 1-step CRISPR-nCas9 knockout vector for <i>Ccel_2126</i> . Gm <sup>R</sup> , Ery <sup>R</sup> . 10.7 kb                  | This study |
| pSOS95               | Expression plasmid for <i>Clostridia</i> spp. Amp <sup>R</sup> , Ery <sup>R</sup> . 7.8 kb                               | [13]       |
| pCPthl-empty         | Empty expression plasmid for <i>Clostridia</i> spp., contains <i>oriT</i> . Amp <sup>R</sup> , Ery <sup>R</sup> . 5.8 kb | This study |
| pCPthl- <i>agrD1</i> | pCPthl-empty containing <i>Ccel_2126</i> . Amp <sup>R</sup> , Ery <sup>R</sup> . 5.9 kb                                  | This study |

Markers: Amp<sup>R</sup>, ampicillin resistance; Gm<sup>R</sup>, gentamicin resistance; Ery<sup>R</sup>, erythromycin resistance

**Table S4. Oligonucleotide primers used in this study.**

| <b>Name</b> | <b>Sequence (5' → 3')</b>                                                                       | <b>Use</b>                                                                          |
|-------------|-------------------------------------------------------------------------------------------------|-------------------------------------------------------------------------------------|
| JK683       | CTATTGGAGAAGTTGATTC                                                                             | Screening for Ccel_2126 mutants, amplification of Ccel_2126 for mutant verification |
| JK684       | GTTCCGGGAATTACTGAAG                                                                             | Screening for Ccel_2126 mutants, amplification of Ccel_2126 for mutant verification |
| JK685       | GTTCTATCTCTAGTTGGG                                                                              | Screening for Ccel_2126 mutants for wild-type contamination                         |
| JK742       | GTTTATCTGTTACCCCGTAGGATCCAGAATTTAAA<br>AGGAGGGATTCCATATGGATTTATGAATTGGCGCC<br>ACTTAATGATTTGCCAG | Construction of pCPthl-empty                                                        |
| JK743       | CTGGCAAATCATTAAAGTGCGCCAATTCATAAAT<br>CCATATGAATCCCTCCTTTTAAATTCTGGATCCTA<br>CGGGGTAACAGATAAAC  | Construction of pCPthl-empty                                                        |
| JK744       | GTTTATCTGTTACCCCGTAGGATCCAGAATTTAAA<br>AGGAGGGATTCCATATGAAAGGTAAAATTTAAATTG                     | Construction of pCPthl- <i>agrD1</i>                                                |
| JK745       | GCAAATCATTAAAGTGCGCCTTACTTGAGTAATG<br>ATTTTG                                                    | Construction of pCPthl- <i>agrD1</i>                                                |

Table S5. Sequence of the synthesized cassette for gene knockout via CRISPR-nCas9.

| Target   | Sequence of gene synthesis cassette                                                                                                                                                                                                                                                                                                                                                                                                                                                                                                                                                                                                                                                                                                                                                                                                                            |
|----------|----------------------------------------------------------------------------------------------------------------------------------------------------------------------------------------------------------------------------------------------------------------------------------------------------------------------------------------------------------------------------------------------------------------------------------------------------------------------------------------------------------------------------------------------------------------------------------------------------------------------------------------------------------------------------------------------------------------------------------------------------------------------------------------------------------------------------------------------------------------|
| Ccl_2126 | TACCGCGAGACCTTGACAAATTTATTTTTTAAAGTTAAAATTAAGTTGAACTGTTCTATCTCTAGTTGGT<br>TTTAGAGCTAGAAATAGCAAGTTAAAATAAGGCTAGTCCGTTATCAACTTGAAAAAGTGGCACCGAGTC<br>GGTGCTTTTTTGAATTCTCTAGAGTCTTACAATCAGGATAGAAAACGAATGTATTAAGTACCGGATAT<br>TAAAACTCATCAAAGGGTGCAGATCGAGGAAACGGATTAATAATTGCAAATAAAAAATCGCTTCATA<br>TAAGAATATTTAAGTTCAACTACCTTCGATGAAAACAGAATGGTATTTTACAGGTCTAAGAATAATA<br>GCAAAAGAGGCTTAATAGCCTCTTTTGCTTACTTGAGTAATGATTTTGGACATTCCCTTTGATAATAAG<br>ACCAAAACCAGCATGCACCTGCAGAAGCAGTAGCAGCAAATACTTA <u>ACTAGTAGATAGA</u> ACAGTTAGA<br>ACCAGCAATTTAATTTTACCTTTCATGTAAATATCCCACCCCTCTATTTTTTGTAAATCTATACACTATT<br>GGTGAATGTTAACCGAAGATATTATTGTAATCACTGAAATGATATTTGAGTAAATATTAGGAACTATTA<br>ATGTAAGTAAAGCATATAACTAATAATACTACCCTTATCCTTAACTCCCGTTTTCTTTTTTTCAGTA<br>ACAATAGTTTTTGACACCAGATCTGCAGGTGCGTATAGAAATACAAAAATTCCGGATATAGCAAATAAA<br>ACTATATTTAAGTGCGTGGAGACC |

*Bsal* restriction site, sgRNA cassette with P4 promoter and target specific N20 sequence, homologous arms surrounding a mutated N20-PAM sequence containing a stop codon and a *SpeI* RES, *Bsal* restriction site

**Table S6. Sequences of structurally verified AIPs used for the WebLogo diagram.** Amino acid sequences are listed for the structurally verified AIPs used for the WebLogo shown in Figure S2A. The sequences of the core peptides are indicated in bold.

| ID            | GenBank ID     | Sequence                                                           | Organism                            |
|---------------|----------------|--------------------------------------------------------------------|-------------------------------------|
| Lplan AgrD    | WP_011102233.1 | MKQKMYEIAIHLFKYVGAKQLVMCC <b>CVGIW</b> FETKIPDELRK                 | <i>Lactobacillus plantarum</i>      |
| Lmon AgrD     | EAA0099852.1   | MKNMNKSVGKFLSRKLEEQSMKVADSSMSKAC <b>CFMFV</b> YEPKSPFVKMQEK        | <i>Listeria monocytogenes</i>       |
| Saur AgrD I   | ABB29295.1     | MNTLFNLFDFFITGILKNIGNIAAYST <b>CDFIM</b> DEVEVPKELTQLHE            | <i>Staphylococcus aureus</i>        |
| Saur AgrD II  | WP_072416134.1 | MNTLVNMFDFDIKLAKAIGIVSGVNA <b>CS</b> SLFDEPKVPAELTNLYDK            | <i>Staphylococcus aureus</i>        |
| Saur AgrD III | WP_115288203.1 | MKLLNKVIELLVDFNSIGYKAAAYIN <b>CD</b> FLLDEAEVPKELTQLHE             | <i>Staphylococcus aureus</i>        |
| Saur AgrD IV  | WP_089535699.1 | MNTLLNIFDFFITGVLKNIGNVASYST <b>CYFIM</b> DEVEVPKELTQLHE            | <i>Staphylococcus aureus</i>        |
| Schr AgrD     | WP_107381457   | MAIFETLFLNFTTLFKTLGNLASINP <b>CTGFF</b> DEPEVPQELRETE              | <i>Staphylococcus chromogenes</i>   |
| Sepi AgrD II  | AAO05235.1     | MENIFNLFKFFTTILEFIGTVAGDSV <b>CAS</b> YFDEPEVPEELTKLYE             | <i>Staphylococcus epidermidis</i>   |
| Shae AgrD     | RIO86649.1     | MTVLVDLIIKLFLLQSIGTVASFTP <b>CTTYF</b> DEPEVPEELTNTKN              | <i>Staphylococcus haemolyticus</i>  |
| Shom AgrD     | NAM95812.1     | MTFITDLFIKFLSLILETVGLATYST <b>CYGYF</b> DESEVPEELTNLER             | <i>Staphylococcus hominis</i>       |
| Shyi AgrD     | NJH67186.1     | MAFFDTLLNLVLTISFKSLGNFAKINP <b>CTVFF</b> DEPEVPEELRQGE             | <i>Staphylococcus hyicus</i>        |
| Sint AgrD     | AAL65836.1     | MRILEVLFNLTNLFQSIGTFARIPT <b>STGFF</b> DEPEIPAELLEEEK              | <i>Staphylococcus intermedius</i>   |
| Slug AgrD     | AAD51710.1     | MNLLSGLFTKGISAIFFIGNFSAQDI <b>CNAYF</b> DEPEVPQELIDLQRKQLIESV      | <i>Staphylococcus lugdunensis</i>   |
| Slug AgrD II  | EFU83103.1     | MNLLSGLFTKGISVIFEFIGNFVQDM <b>CNGYF</b> DEPEVPQELIDLHRN            | <i>Staphylococcus lugdunensis</i>   |
| Ssap AgrD     | WP_069838087.1 | MNVIKSISKSISKSISKSISNYFAKVFASIGSISTINP <b>CFGYT</b> DESEIPKELTDLYE | <i>Staphylococcus saprophyticus</i> |
| Ssch AgrD     | WP_050345386.1 | MKFLDLLKLLTSVFA SISTYAKYPF <b>CIGYF</b> YEPEIPAELLEEE              | <i>Staphylococcus schleiferi</i>    |
| Ssim AgrD     | ERS92975.1     | MDLLNGIFKLF AFIF EKIGNLAKYNP <b>CLGFL</b> DEPTVPKELLEEDK           | <i>Staphylococcus simulans</i>      |
| Svit AgrD     | WP_016912307.1 | MNLLATLFSKASNFLSSFGEKAVIRG <b>CTAFL</b> DETEVPAELLKEKQ             | <i>Staphylococcus vitulinus</i>     |
| Swar AgrD     | AGC90169.1     | MEFLVNLFFKFFTSIMEFVGFVAGYSP <b>CTNFF</b> DEPEVPSELTKIYE            | <i>Staphylococcus warneri</i>       |



Table S7. Amounts of reagents used in every step of the SPPS of coupling in method A.

| amino acid                                                    | Oxyrna Pure                       | COMU                               | DIPEA                                                                                                                                                 | time of reaction             |
|---------------------------------------------------------------|-----------------------------------|------------------------------------|-------------------------------------------------------------------------------------------------------------------------------------------------------|------------------------------|
| <b>Fmoc-Ser-(OtBu)</b><br>794.7 mg;<br>2.07 mmol;<br>2.66 eq. | 313.4 mg;<br>2.2 mmol;<br>2.8 eq. | 857.3 mg;<br>2.0 mmol;<br>2.5 eq.  | 680 $\mu$ L;<br>4.0 mol;<br>5.1 eq.                                                                                                                   | 1 h 11 min                   |
| <b>Fmoc-Trp</b><br>838.1 mg;<br>2.0 mmol;<br>2.6 eq.          | 279.7 mg;<br>2.0 mmol;<br>2.5 eq. | 838.6 mg;<br>1.96 mmol;<br>2.5 eq. | 680 $\mu$ L;<br>4.0 mol;<br>5.1 eq.                                                                                                                   | 42 min                       |
| <b>Fmoc-Phe</b><br>788.3 mg;<br>2.0 mmol;<br>2.6 eq.          | 316.6 mg;<br>2.2 mmol;<br>2.9 eq. | 974 mg;<br>2.3 mmol;<br>2.9 eq.    | 680 $\mu$ L;<br>4.0 mol;<br>5.1 eq.                                                                                                                   | 35 min                       |
| <b>Fmoc-Trp</b><br>1037 mg;<br>2.4 mmol;<br>3.1 eq.           | 289 mg;<br>2.0 mmol;<br>2.6 eq.   | 936.5 mg;<br>2.2 mmol;<br>2.8 eq.  | 680 $\mu$ L;<br>4.0 mol;<br>5.1 eq.                                                                                                                   | 1 h 40 min                   |
| <b>Trt-S-Cys-NH-Boc</b><br>970.2 mg;<br>2.1 mmol;<br>2.7 eq.  | 281.6 mg;<br>2.0 mmol;<br>2.5 eq. | 1.209 g;<br>2.4 mmol;<br>3.1 eq.   | collidine instead of DIPEA<br>was used here first: 517<br>$\mu$ L;<br>4.7 mmol;<br>6.0 eq.<br>Later 340 $\mu$ L (2 mmol;<br>2.6 eq.) DIPEA was added. | (1) 1 h 40 min<br>(2) 27 min |

**Table S8. Amounts of reagents used in every step of the SPPS of coupling in method B.**

| <b>amino acid</b>                                          | <b>HBTU</b>                 | <b>HOBt</b>                 | <b>EtN<i>i</i>Pr<sub>2</sub></b> | <b>time of reaction</b> |
|------------------------------------------------------------|-----------------------------|-----------------------------|----------------------------------|-------------------------|
| <b>Fmoc-Ser(<i>t</i>Bu)-OH</b><br>522 mg, 1.36 mmol, 4 eq. | 516 mg, 1.36 mmol,<br>4 eq. | 208 mg, 1.36 mmol,<br>4 eq. | 466 $\mu$ L, 2.72 mmol,<br>8 eq. | 3 h                     |
| <b>Fmoc-Trp-OH</b><br>580 mg, 1.36 mmol, 4 eq.             | 516 mg, 1.36 mmol,<br>4 eq. | 208 mg, 1.36 mmol,<br>4 eq. | 466 $\mu$ L, 2.72 mmol,<br>8 eq. | 3 h                     |
| <b>Fmoc-Phe-OH</b><br>527 mg, 1.36 mmol, 4 eq.             | 516 mg, 1.36 mmol,<br>4 eq. | 208 mg, 1.36 mmol,<br>4 eq. | 466 $\mu$ L, 2.72 mmol,<br>8 eq. | 3 h                     |
| <b>Fmoc-Trp-OH</b><br>580 mg, 1.36 mmol, 4 eq.             | 516 mg, 1.36 mmol,<br>4 eq. | 208 mg, 1.36 mmol,<br>4 eq. | 466 $\mu$ L, 2.72 mmol,<br>8 eq. | 3 h                     |

**At that point, the resin (calc. loading 0.48 mmol) was split up for different couplings**

## References

- [1] T. Lincke, S. Behnken, K. Ishida, M. Roth, C. Hertweck, *Angew. Chem., Int. Ed.* **2010**, *49*, 2011-2013.
- [2] W. Higashide, Y. Li, Y. Yang, J. C. Liao, *Appl. Environ. Microbiol.* **2011**, *77*, 2727-2733.
- [3] S. H. Baer, H. P. Blaschek, T. L. Smith, *Appl. Environ. Microbiol.* **1987**, *53*, 2854-2861.
- [4] K. L. Dunbar, H. Büttner, E. M. Molloy, M. Dell, J. Kumpfmüller, C. Hertweck, *Angew. Chem., Int. Ed.* **2018**, *57*, 14080-14084.
- [5] K. Blin, L. E. Pedersen, T. Weber, S. Y. Lee, *Synth. Syst. Biotechnol.* **2016**, *1*, 118-121.
- [6] al. Fedorova, A. Arseniev, P. Selkova, G. Pobegalov, I. Goryanin, A. Vasileva, O. Musharova, M. Abramova, M. Kazalov, T. Zyubko, T. Artamonova, D. Artamonova, S. Shmakov, M. Khodorkovskii, K. Severinov, *Nucleic Acids Res.* **2020**, *48*, 2026-2034; bT. Xu, Y. Li, Z. Shi, C. L. Hemme, Y. Li, Y. Zhu, J. D. Van Nostrand, Z. He, J. Zhou, *Appl. Environ. Microbiol.* **2015**, *81*, 4423-4431.
- [7] G.-Z. Cui, W. Hong, J. Zhang, W.-L. Li, Y. Feng, Y.-J. Liu, Q. Cui, *J. Microbiol. Methods* **2012**, *89*, 201-208.
- [8] P. Thomas, A. C. Sekhar, R. Upreti, M. M. Mujawar, S. S. Pasha, *Biotechnol. Rep.* **2015**, *8*, 45-55.
- [9] K. Katoh, J. Rozewicki, K. D. Yamada, *Brief. Bioinform.* **2019**, *20*, 1160-1166.
- [10] K. Tamura, G. Stecher, D. Peterson, A. Filipski, S. Kumar, *Mol. Biol. Evol.* **2013**, *30*, 2725-2729.
- [11] F. Sievers, A. Wilm, D. Dineen, T. J. Gibson, K. Karplus, W. Li, R. Lopez, H. McWilliam, M. Remmert, J. Söding, J. D. Thompson, D. G. Higgins, *Mol. Syst. Biol.* **2011**, *7*, 539.
- [12] G. E. Crooks, G. Hon, J. M. Chandonia, S. E. Brenner, *Genome Res.* **2004**, *14*, 1188-1190.
- [13] S. B. Tummala, N. E. Welker, E. T. Papoutsakis, *Appl. Environ. Microbiol.* **1999**, *65*, 3793-3799.
